# Supplementary material for: Electrochemically mediated synthesis of trifluoromethylallenes
Source: Royal Society of Chemistry journal article supplement (doi:10.1039/d4qo00332b), 2024-01-01

## Supporting Information

### Electrochemically mediated synthesis of trifluoromethylallenes

Jia-Lan Zhang, Jin-Xiu Xiong, Lu-Qi Fei, Fei-Hu Cui, Shu-Hui Li\*, Hai-Tao Tang, Yan-Zhao Xie\* and Ying-Ming Pan\*

<sup>a</sup> State Key Laboratory for Chemistry and Molecular Engineering of Medicinal Resources, Key Laboratory for Chemistry and Molecular Engineering of Medicinal Resources (Ministry of Education of China), Collaborative Innovation Center for Guangxi Ethnic Medicine, School of Chemistry and Pharmaceutical Sciences, Guangxi Normal University

<sup>b</sup> Food Nutrition and Materials Research Center, Fujian Polytechnic Normal University  
E-mail: panym@mailbox.gxnu.edu.cn  
E-mail: xieyanzhaofz@126.com

### Table of Contents

|                                                                |           |
|----------------------------------------------------------------|-----------|
| <b>1 General Methods</b> .....                                 | <b>2</b>  |
| <b>2. Chemical Experiment procedure</b> .....                  | <b>3</b>  |
| 2.1 Supplementary experiments.....                             | 3         |
| 2.2 Synthesis of Substrates .....                              | 5         |
| 2.3 General procedure for the preparation of products .....    | 5         |
| 2.4 Control Experiments .....                                  | 7         |
| 2.5 BHT or TEMPO trapped experiment.....                       | 8         |
| 2.6 Copies of <sup>1</sup> H NMR for the Product.....          | 9         |
| 2.7 Cyclic Voltammetry Studies .....                           | 9         |
| <b>3.Characterization Data and Spectrum of Compounds</b> ..... | <b>11</b> |
| <b>4.Copies of the NMR spectra</b> .....                       | <b>21</b> |

## 1 General Methods

Unless otherwise noted, all reagents and solvents were obtained commercially and used without further purification. Column chromatography on silica gel (300-400 mesh) was carried out using technical grade 60 - 90 °C petroleum ether and analytical grade EtOAc (without further purification).  $^1\text{H}$  and  $^{13}\text{C}$  and  $^{19}\text{F}$  spectra were recorded on a 400 MHz or 500 MHz spectrometer. Chemical shifts were reported in ppm.  $^1\text{H}$  and  $^{19}\text{F}$  NMR spectra were referenced to  $\text{CDCl}_3$  (7.26 ppm) or DMSO (2.5 ppm) or MeOD (4.87 ppm), and  $^{13}\text{C}$ -NMR spectra were referenced to  $\text{CDCl}_3$  (77.0 ppm) or DMSO (39.5 ppm) or MeOD (49.0 ppm). Peak multiplicities were designated by the following abbreviations: s, singlet; d, doublet; t, triplet; m, multiplet; brs, broad singlet and J, coupling constant in Hz. The HRMS spectrum was measured by micromass QTOF2 Quadrupole/Time of Flight Tandem mass spectrometer with electron spray ionization. Potentiostat was purchased from Shanghai Xinrui Company and the model is DJS-292B. Cyclic voltammograms were recorded on a CHI 660E potentiostat.

## 2. Chemical Experiment procedure

### 2.1 Supplementary experiments

**Table S1** Screening of Reaction Conditions

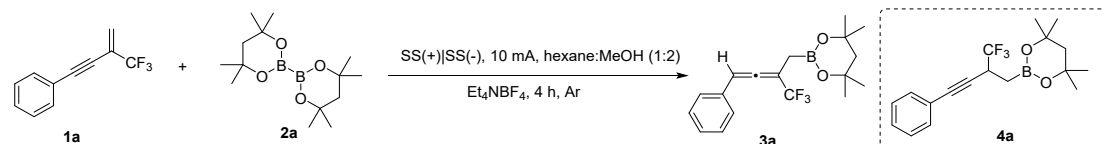

| Entry | Variation from standard conditions                                                        | Yield/% <sup>[b]</sup> |
|-------|-------------------------------------------------------------------------------------------|------------------------|
| 1     | none                                                                                      | 81                     |
| 2     | CH <sub>3</sub> CN instead of hexane:MeOH(1:2)                                            | 0                      |
| 3     | CH <sub>3</sub> OH instead of hexane:MeOH(1:2)                                            | 66                     |
| 4     | THF/CH <sub>3</sub> OH(1: 1) instead of hexane:MeOH(1:2)                                  | 0                      |
| 5     | THF instead of hexane:MeOH(1:2)                                                           | 0                      |
| 6     | 1,4-dioxane/CH <sub>3</sub> OH(1:2) instead of hexane:MeOH(1:2)                           | 50                     |
| 7     | CH <sub>3</sub> CN/CH <sub>3</sub> OH (9:1) instead of hexane:MeOH(1:2)                   | 30                     |
| 8     | THF/CH <sub>3</sub> OH(1:5) instead of hexane:MeOH(1:2)                                   | 47                     |
| 9     | HFIP instead of hexane:MeOH(1:2)                                                          | 20                     |
| 10    | C (+)   SS (-) instead of SS (+)   SS (-)                                                 | 0                      |
| 11    | SS (+)   Pt (-) instead of SS (+)   SS (-)                                                | 40                     |
| 12    | SS (+)   C (-) instead of SS (+)   SS (-)                                                 | 0                      |
| 13    | Fe (+)   SS (-) instead of SS (+)   SS (-)                                                | 0                      |
| 14    | 2.5 eq B <sub>2</sub> oct <sub>2</sub>                                                    | 79                     |
| 15    | 1.5 eq B <sub>2</sub> oct <sub>2</sub>                                                    | 77                     |
| 16    | 1 eq K <sub>2</sub> CO <sub>3</sub> as the base                                           | 54                     |
| 17    | 1 eq CsF as the base                                                                      | 0                      |
| 18    | 1 eq CH <sub>3</sub> ONa as the base                                                      | 20                     |
| 19    | 1 eq <sup>t</sup> BuOK as the base                                                        | 5                      |
| 20    | LiClO <sub>4</sub> instead of Et <sub>4</sub> NBF <sub>4</sub>                            | 0                      |
| 21    | <sup>n</sup> Bu <sub>4</sub> NBr instead of Et <sub>4</sub> NBF <sub>4</sub>              | 20                     |
| 22    | <sup>n</sup> Bu <sub>4</sub> NCl instead of Et <sub>4</sub> NBF <sub>4</sub>              | 20                     |
| 23    | <sup>n</sup> Bu <sub>4</sub> NI instead of Et <sub>4</sub> NBF <sub>4</sub>               | 30                     |
| 24    | <sup>n</sup> Bu <sub>4</sub> NPF <sub>6</sub> instead of Et <sub>4</sub> NBF <sub>4</sub> | 54                     |
| 25    | 5 mA instead of 10 mA                                                                     | 50                     |
| 26    | 15 mA instead of 10 mA                                                                    | 56                     |
| 27    | 6 h instead of 4 h                                                                        | 60                     |
| 28    | 8 h instead of 4 h                                                                        | 50                     |
| 29    | no current                                                                                | 0                      |

Standard conditions: **1a** (0.2 mmol), **2a** (0.4 mmol), Et<sub>4</sub>NBF<sub>4</sub> [0.05 M] in hexane:CH<sub>3</sub>OH (1:2, 6 mL), rt, stainless steel electrodes (cathode and anode), 10 mA, 3 F·mol<sup>-1</sup>, undivided cell, under Ar.  
**1a** (0.1 mmol), **2a** (0.15 mmol), Et<sub>4</sub>NBF<sub>4</sub> [0.05 M] in hexane:CH<sub>3</sub>OH (1:2, 6 mL), rt, stainless steel

electrodes (cathode and anode), 10 mA, 3 F·mol<sup>-1</sup>, undivided cell, under Ar. <sup>[a]</sup> Yield of isolated product .

## 2.2 Synthesis of Substrates

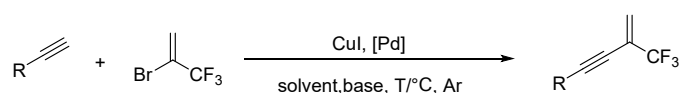

**Method A:** <sup>1</sup>Under argon atmosphere, PdCl<sub>2</sub>(PPh<sub>3</sub>)<sub>2</sub> (0.14 g, 2 mol %) and CuI (0.10 g, 5 mol %) were added into an oven dried Schlenk flask, followed by dry degassed triethylamine (30 mL) and 2-bromo-3,3,3-trifluoroprop-1-ene (1.75 g, 10 mmol, 1.0 equiv.). The corresponding 1-alkyne (11 mmol, 1.1 equiv.) was added dropwise via a syringe. The slurry was stirred at 50 °C (oil bath) overnight, and quenched with saturated NH<sub>4</sub>Cl solution, extracted with hexane, dried over anhydrous Na<sub>2</sub>SO<sub>4</sub>. After concentration under vacuum, the residue was purified by distillation or column chromatography over silica gel (200-300 mesh) using ethyl acetate/petroleum ether as eluent.

**Method B:** <sup>2</sup>Under argon atmosphere, Pd(PPh<sub>3</sub>)<sub>4</sub> (0.0520 g, 0.3 mol %) and CuI (0.0571 g, 2 mol %) were added into an oven dried round bottom flask, followed by dry degassed diethylamine (7.5 mL) and THF (20 mL), sequentially. The corresponding 1-alkyne (15 mmol, 1.0 equiv.) and 2-bromo-3,3,3-trifluoroprop-1-ene (3.499 g, 1.3 equiv.) was added dropwise. The slurry was stirred at room temperature overnight, and quenched with saturated NH<sub>4</sub>Cl solution at 0 °C, extracted with hexane/Et<sub>2</sub>O (1:1), washed by 1 mol/L HCl, dried over anhydrous Na<sub>2</sub>SO<sub>4</sub>. After concentration under vacuum, the residue was purified by distillation.

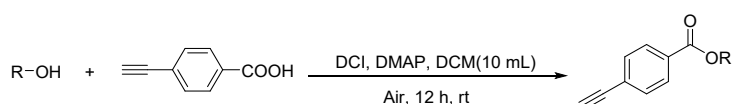

To a mixture of the 4-vinylbenzoic acid (1.0 equiv.), the corresponding alcohol or amine (1.5equiv.) and DMAP (0.2 equiv.) in CH<sub>2</sub>Cl<sub>2</sub> (0.2 M) was added N, N'- Diisopropylcarbodiimide (1.2 equiv.) dropwise. The reaction was stirred at room temperature until its completion, which was monitored by TLC. The reaction was quenched with H<sub>2</sub>O and extracted with CH<sub>2</sub>Cl<sub>2</sub>. The organic layers were washed with brine, dried over anhydrous Na<sub>2</sub>SO<sub>4</sub>, filtered, concentrated in vacuo. Flash chromatography (EtOAc/Hexane 6 = 1:5) afforded the product. The analytical data of the alkenes are in accordance with the reported data<sup>2</sup>.

### References:

1. C. Yang, Z.-L. Liu, D.-T. Dai, Q. Li, W.-W. Ma, M. Zhao and Y.-H. Xu, Catalytic Asymmetric Conjugate Protosilylation and Protoborylation of 2-Trifluoromethyl Enynes for Synthesis of Functionalized Allenes, *Org. Lett.*, 2020, **22**, 1360–1367;
2. S. Chen, J. Wang, L.-G. Xie, Transition Metal-Free Formal Hydro/Deuteromethylthiolation of Unactivated Alkenes, *Org. Biomol. Chem.* 2021, **19**, 4037–4042.

## 2.3 General procedure for the preparation of products

General procedure for synthesis of 4,4,6,6-tetramethyl-2-(4-phenyl-2-(trifluoromethyl)buta-2,3-dien-1-yl)-1,3,2-dioxaborinane

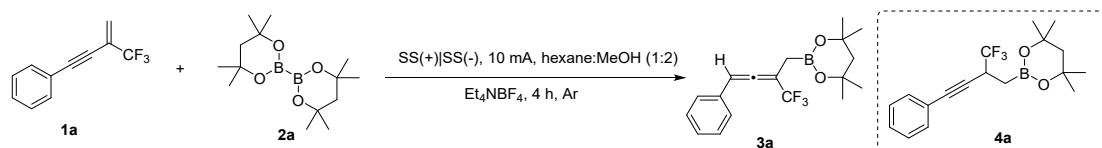

B<sub>2</sub>pin<sub>2</sub> (112.7 mg, 0.2 mmol, 2 equiv) and Et<sub>4</sub>NBF<sub>4</sub> (65.1 mg, 0.3 mmol, 0.05 M) were weighed under Argon in a glovebox and added in a 10 mL IKA<sup>®</sup> vial equipped with a magnetic stirrer. The 2-trifluoromethyl-1,3-enyne (0.2 mmol, 1 equiv) was added and all compounds were solubilized in 2 mL of hexane and 4 mL of methanol. Two stainless steel electrodes (SST) were immersed in the solution and the vial was set on the IKA ElectraSyn<sup>®</sup> device at 10 mA. The reaction is monitored by TLC and stopped when total conversion of the alkene substrate is observed. The crude mixture is filtered through a pad of silica and concentrated under reduced pressure. The residue was purified by flash chromatography, preparative thin layer chromatography (PTLC) or reversed-phase chromatography.

General procedure for synthesis of dimethyl(phenyl)(4-phenyl-2-(trifluoromethyl)buta-2,3-dien-1-yl)silane

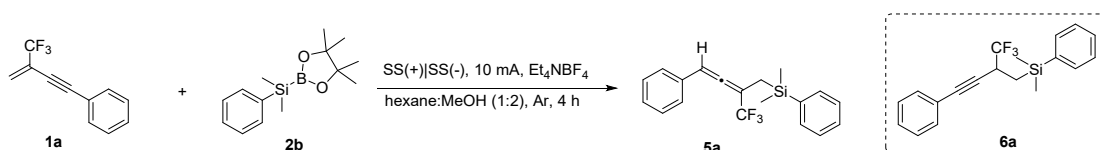

PhMe<sub>2</sub>Si-Bpin (39.4 mg, 0.15 mmol, 1.5 equiv) and Et<sub>4</sub>NBF<sub>4</sub> (65.1 mg, 0.3 mmol, 0.05 M) were weighed under Argon in a glovebox and added in a 10 mL IKA<sup>®</sup> vial equipped with a magnetic stirrer. The 2-trifluoromethyl-1,3-enyne (0.1 mmol, 1 equiv) was added and all compounds were solubilized in 2 mL of hexane and 4 mL of methanol. Two stainless steel electrodes (SST) were immersed in the solution and the vial was set on the IKA ElectraSyn<sup>®</sup> device at 10 mA. The reaction is monitored by TLC and stopped when total conversion of the alkene substrate is observed. The crude mixture is filtered through a pad of silica and concentrated under reduced pressure. The residue was purified by flash chromatography, preparative thin layer chromatography (PTLC) or reversed-phase chromatography.

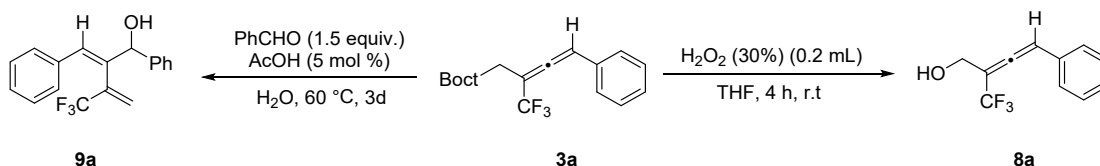

Under argon atmosphere, the starting material **3** (0.0338 g, 0.1 mmol), benzaldehyde (0.15 mmol, 1.5 equiv.) and H<sub>2</sub>O (0.9 mL) were added sequentially into a Schlenk tube. Then AcOH (0.0003 g, 5 mol %) in H<sub>2</sub>O (0.1 mL) was added into the mixture and stirred at 60 °C (oil bath) for 3 d. The mixture was cooled to room temperature, extracted with DCM (15 mL × 3). The combined organic layers dried over anhydrous Na<sub>2</sub>SO<sub>4</sub>. After concentration under vacuum, the residue was purified by column chromatography over silica gel (200-300 mesh) using ethyl acetate/petroleum ether (1:5) as eluent to afford the product **8a** as pale yellow oil (0.0234 g, 77% yield).

The starting material **3** (0.0338 g, 0.1 mmol) was dissolved in THF (2 mL) and cooled to 0 °C. Then, 30% H<sub>2</sub>O<sub>2</sub> (0.2 mL) was added dropwise. The mixture was warmed to room temperature, diluted with 1 mL THF and stirred for 4 h in the air. When the reaction was over, the resulting solution was cooled to 0 °C again, saturated aqueous Na<sub>2</sub>S<sub>2</sub>O<sub>3</sub> (0.5 mL) was added slowly, stirred for a further 5 min. Warmed to room temperature and extracted with ethyl acetate (15 mL × 3), combined the organic layers and dried over anhydrous Na<sub>2</sub>SO<sub>4</sub>. After concentration under vacuum, the residue was purified by column chromatography over silica gel (200-300 mesh) using ethyl

acetate/petroleum ether (1: 5) as eluent to afford the product as pale yellow oil (0.0214 g, 88% yield)

## 2.4 Control Experiments

### a) Radical inhibition experiments

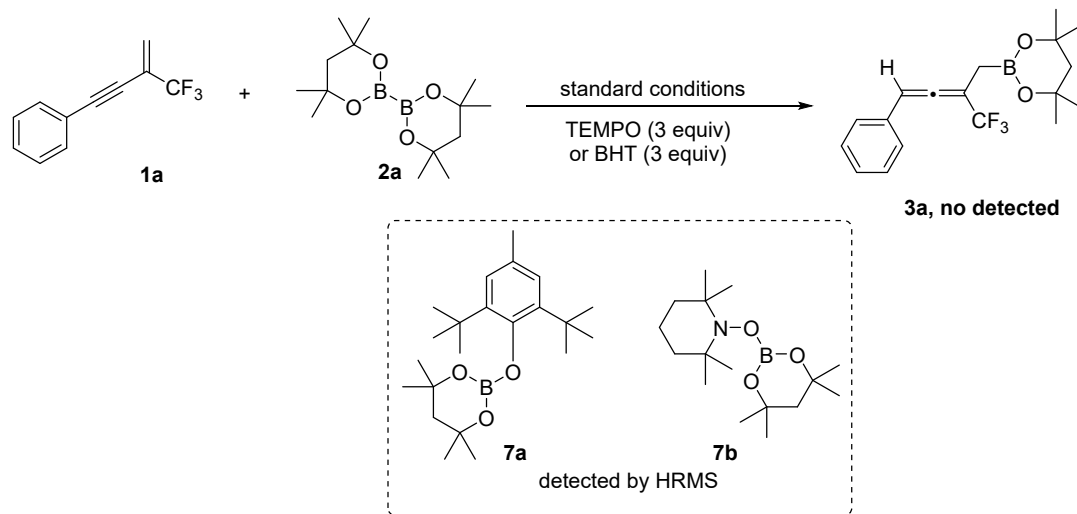

### b) Labeling experiment

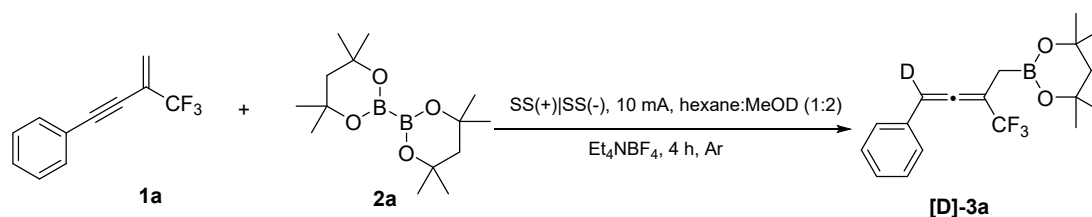

### c) Divided electrolysis experiments

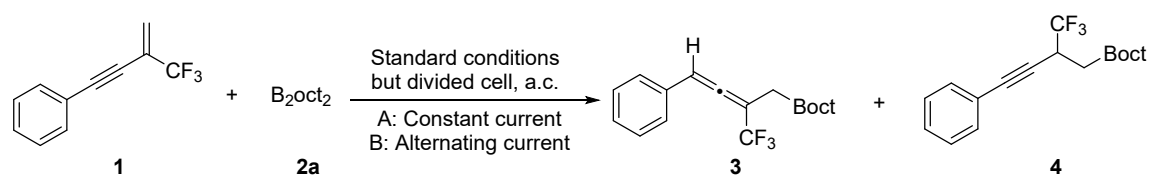

AC:  $i = \pm 10 \text{ mA}$ ,  $t_{\pm} = 1 \text{ s}$

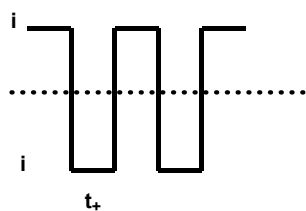

| Conditions | Yield of (3/4 ratio) |
|------------|----------------------|
| Method A   | N.R                  |
| Method B   | 13%                  |

**Procedures for reaction b:** A reaction was set-up according to the general procedure using a mixture of  $\text{CH}_3\text{OD}$ : hexane (2:1) as the solvent. The ratio of H- and D- products were determined by  $^1\text{H}$  NMR.

## 2.5 BHT or TEMPO trapped experiment

|             |            |                        |         |                 |                      |
|-------------|------------|------------------------|---------|-----------------|----------------------|
| Sample Name | BHT        | Position               | P1-A1   | Instrument Name | Instrument 1         |
| User Name   |            | Inj Vol                | 0.2     | InjPosition     |                      |
| Sample Type | Sample     | IRM Calibration Status | Success | Data Filename   | BHT.d                |
| ACQ Method  | Yijing-8.m | Comment                |         | Acquired Time   | 1/17/2024 9:35:08 PM |

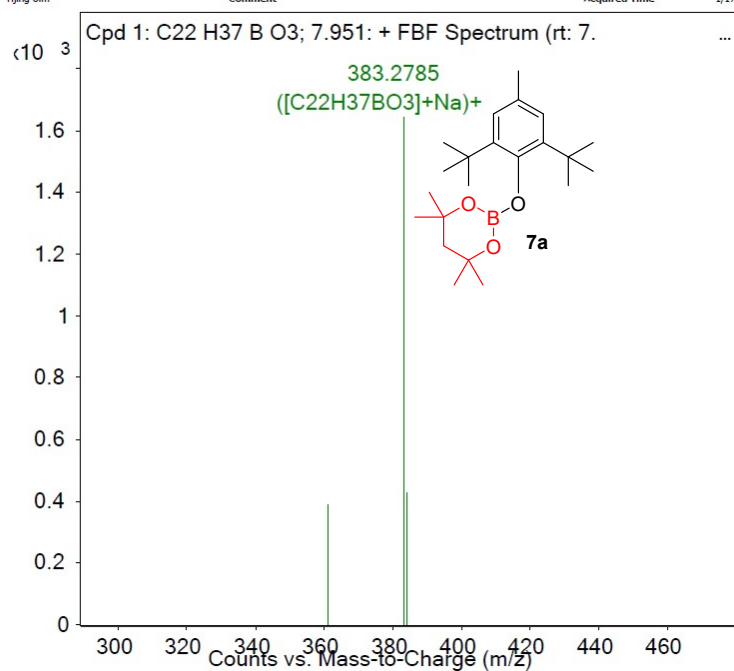

**Figure S2** HRMS analysis compound **7a**. HRMS (m/z) [ESI]: calculated for C<sub>22</sub>H<sub>37</sub>BO<sub>3</sub> [M+Na]<sup>+</sup>: 383.2728, found 383.2785.

|             |             |                        |                                   |                 |             |
|-------------|-------------|------------------------|-----------------------------------|-----------------|-------------|
| Sample Name | Unavailable | Position               | Unavailable                       | Instrument Name | Unavailable |
| User Name   | Unavailable | Inj Vol                | Unavailable                       | InjPosition     | Unavailable |
| Sample Type | Unavailable | IRM Calibration Status | Success                           | Data Filename   | TEMPO.d     |
| ACQ Method  |             | Comment                | Sample information is unavailable | Acquired Time   | Unavailable |

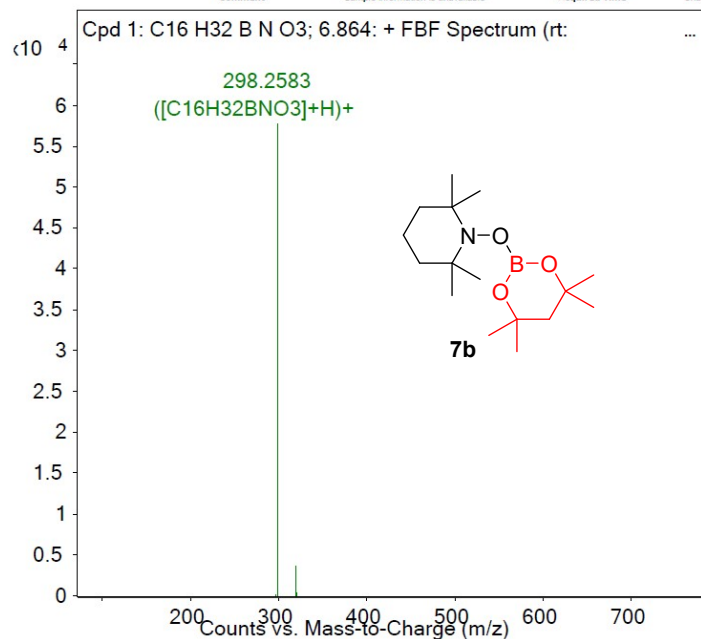

**Figure S3** HRMS analysis compound **7b**. HRMS (m/z) [ESI]: calculated for C<sub>16</sub>H<sub>32</sub>BNO<sub>3</sub> [M+Na]<sup>+</sup>: 298.2548, found 298.2583.



## 2.6 Copies of $^1\text{H}$ NMR for the Product

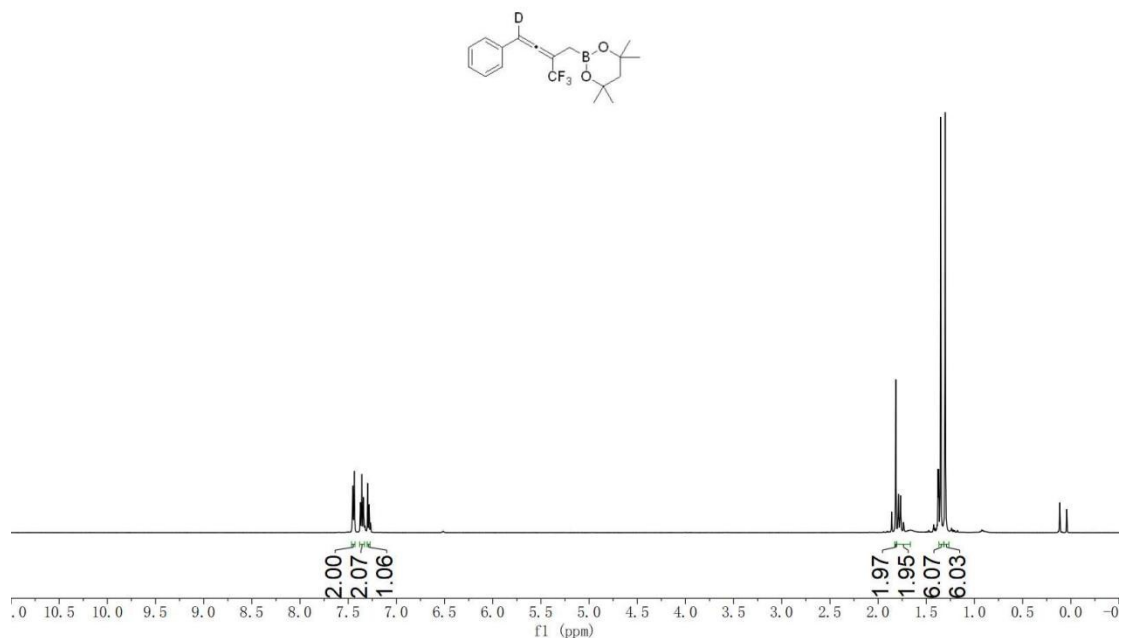

## 2.7 Cyclic Voltammetry Studies

The cyclic voltammograms were recorded in an electrolyte solution of  $\text{Et}_4\text{NBF}_4$  (0.05 M) in various solvents using a glassy carbon disk working electrode (diameter, 3 mm), a Pt wire auxiliary electrode and a Ag/AgCl reference electrode. The scan rate was 100 mV/s.

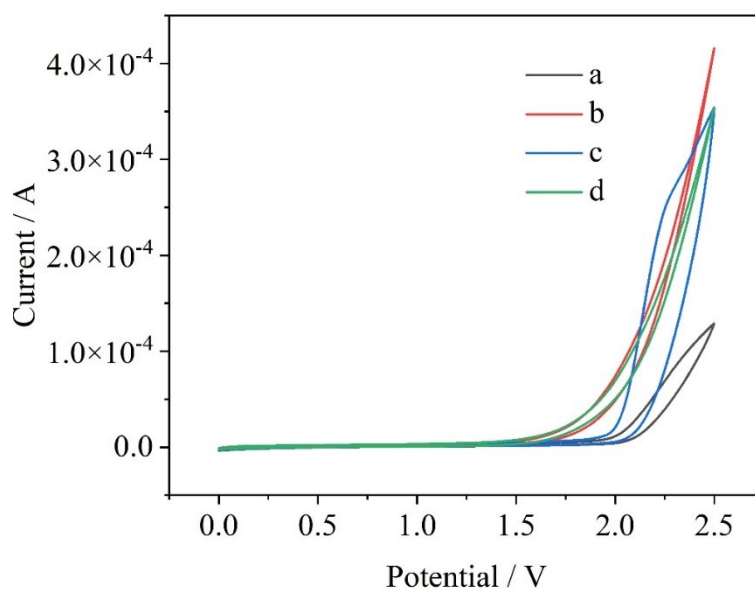

**Figure S4-1** Cyclic voltammograms in 0.3 mmol  $\text{B}_2\text{oct}_2$  + 0.05 M  $\text{Et}_4\text{NBF}_4$ . a)  $\text{CH}_3\text{CN}$ , 6 mL. b)  $\text{CH}_3\text{OH}$ , 6 mL. c)  $\text{CH}_3\text{ONa}$  +  $\text{CH}_3\text{CN}$ , 6 mL. d)  $\text{CH}_3\text{OH}$ +Hexane, 6 mL.

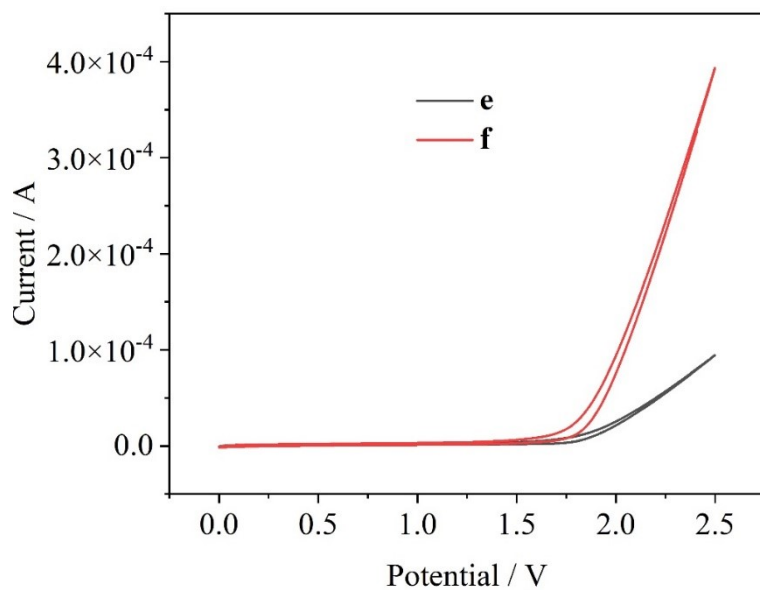

**Figure S4-2** Cyclic voltammograms in 0.3 mmol enyne + 0.05 M  $\text{Et}_4\text{NBF}_4$  +  $\text{CH}_3\text{OH}$ /hexane (1:2, 6 mL). e) no  $\text{B}_2\text{oct}_2$ . f) with  $\text{B}_2\text{oct}_2$

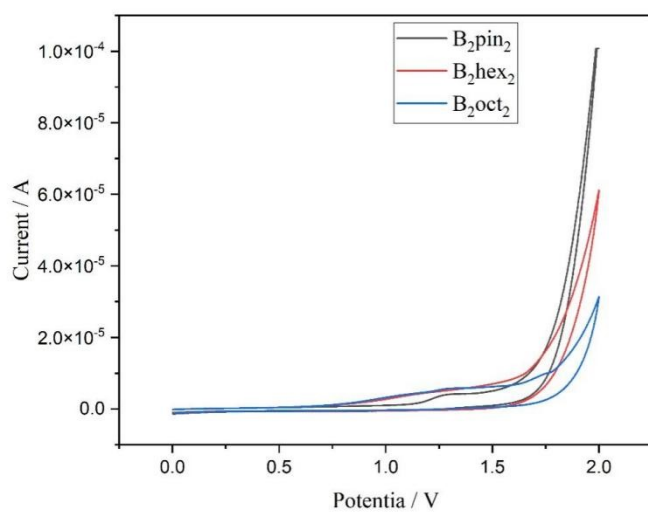

**Figure S4-3** Cyclic voltammograms in 0.3 mmol Borane + 0.05 M  $\text{Et}_4\text{NBF}_4$  +  $\text{CH}_3\text{OH}$ /hexane (1:2, 6 mL).

### 3.Characterization Data and Spectrum of Compounds

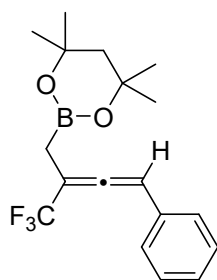

**3a**

4,4,6,6-tetramethyl-2-(4-phenyl-2-(trifluoromethyl)buta-2,3-dien-1-yl)-1,3,2-dioxaborinane(**3a**):

Pale yellow oil, yield = 81%, 0.0548 g

<sup>1</sup>H NMR (400 MHz, Chloroform-d)  $\delta$  7.33-7.31 (m, 2H), 7.21-7.25 (m, 2H), 7.17-7.14 (m, 1H), 6.40-6.38(m, 1H), 1.69 (s, 2H), 1.67-1.59 (m, 2H), 1.23 (s, 6H), 1.18 (s, 6H); <sup>13</sup>C NMR (101 MHz, Chloroform-d)  $\delta$  204.4 (q,  $J = 4.1$  Hz), 132.8, 131.7, 128.6, 127.6, 123.9 (q,  $J = 274.7$  Hz) , 100.2(q,  $J = 30.3$  Hz), 99.8, 71.1, 48.7, 31.6, 31.5; <sup>19</sup>F NMR (376 MHz, Chloroform-d)  $\delta$  -64.85, -72.60; <sup>11</sup>B NMR (128 MHz, Chloroform-d)  $\delta$  28.66; HRMS (ESI)  $m/z$  calcd for C<sub>18</sub>H<sub>22</sub>BF<sub>3</sub>O<sub>2</sub>Na [M+Na]<sup>+</sup> : 361.1557, found: 361.1563

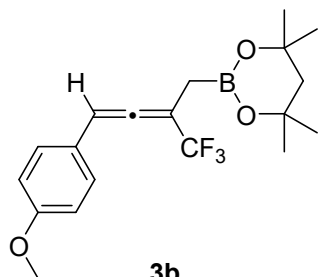

**3b**

2-(4-(4-methoxyphenyl)-2-(trifluoromethyl)buta-2,3-dien-1-yl)-4,4,6,6-tetramethyl-1,3,2-dioxaborinane(**3b**): Pale yellow oil, yield = 75%, 0.0552 g

<sup>1</sup>H NMR (400 MHz, Chloroform-d)  $\delta$  7.35-7.30 (m, 2H), 6.88-6.84 (m, 2H), 6.45-6.43 (m, 1H), 3.81 (s, 3H), 1.78 (s, 2H), 1.74-1.68 (m, 2H), 1.31 (s, 7H), 1.27 (s, 8H); <sup>13</sup>C NMR (126 MHz, Chloroform-d)  $\delta$  203.9 (q,  $J = 3.8$  Hz), 159.4, 133.2, 128.8, 125.1, 123.9(q,  $J = 274.7$  Hz), 114.1, 100.0(q,  $J = 35.3$  Hz), 99.3, 71.1, 69.5, 55.4, 48.7, 31.7, 31.6; <sup>19</sup>F NMR (376 MHz, Chloroform-d)  $\delta$  -64.93, -72.68; <sup>11</sup>B NMR (128 MHz, Chloroform-d)  $\delta$  28.60; HRMS (ESI)  $m/z$  calcd for C<sub>19</sub>H<sub>24</sub>BF<sub>3</sub>O<sub>3</sub>Na [M+Na]<sup>+</sup> : 391.1663, found: 391.1674

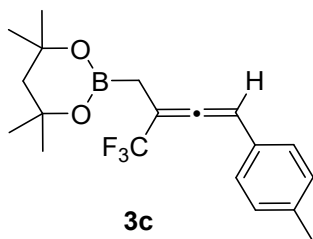

**3c**

4,4,6,6-tetramethyl-2-(4-(p-tolyl)-2-(trifluoromethyl)buta-2,3-dien-1-yl)-1,3,2-dioxaborinane(**3c**):

Pale yellow oil, yield = 78%, 0.0549 g

<sup>1</sup>H NMR (500 MHz, Chloroform-d)  $\delta$  7.31-7.30 (m, 2H), 7.15-7.12 (m, 2H), 6.47-6.45 (m, 1H), 2.35 (s, 3H), 1.79 (s, 2H), 1.75-1.71 (m, 2H), 1.33 (s, 6H), 1.29 (s, 7H); <sup>13</sup>C NMR (126 MHz,

Chloroform-d)  $\delta$  204.2 (q,  $J = 3.8$  Hz), 137.7, 131.7, 129.8, 129.4, 129.0, 127.5, 124.0 (q,  $J = 274.7$  Hz), 119.9, 100.0 (q,  $J = 35.3$  Hz), 99.6, 71.1, 48.8, 31.7, 31.6, 21.3;  **$^{19}\text{F}$  NMR** (471 MHz, Chloroform-d)  $\delta$  -64.83, -72.61;  **$^{11}\text{B}$  NMR** (128 MHz, Chloroform-d)  $\delta$  28.69; **HRMS** (ESI)  $m/z$  calcd for  $\text{C}_{19}\text{H}_{24}\text{BF}_3\text{O}_2\text{Na}$   $[\text{M}+\text{Na}]^+$ : 375.1714, found: 375.1721

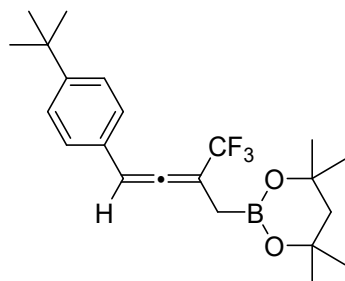

**3d**

2-(4-(4-(tert-butyl)phenyl)-2-(trifluoromethyl)buta-2,3-dien-1-yl)-4,4,6,6-tetramethyl-1,3,2-dioxaborinane(**3d**): Pale yellow oil, yield = 69%, 0.0544 g

**$^1\text{H}$  NMR** (400 MHz, Chloroform-d)  $\delta$  7.33 (s, 4H), 6.47-6.44 (m, 1H), 1.77 (s, 2H), 1.73-1.68 (m, 2H), 1.31 (s, 12H), 1.26 (s, 9H);  **$^{13}\text{C}$  NMR** (101 MHz, Chloroform-d)  $\delta$  204.4 (q,  $J = 4.1$  Hz), 150.1, 131.5, 129.8, 127.3, 125.5, 125.2, 123.9 (q,  $J = 275.7$  Hz), 99.9 (q,  $J = 34.3$  Hz), 99.4, 71.1, 48.7, 34.6, 31.7, 31.5, 31.3;  **$^{19}\text{F}$  NMR** (376 MHz, Chloroform-d)  $\delta$  -64.78, -72.65;  **$^{11}\text{B}$  NMR** (128 MHz, Chloroform-d)  $\delta$  28.48; **HRMS** (ESI)  $m/z$  calcd for  $\text{C}_{22}\text{H}_{30}\text{BF}_3\text{O}_2\text{Na}$   $[\text{M}+\text{Na}]^+$ : 417.2183, found: 417.2195

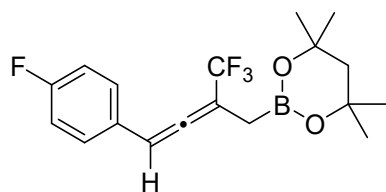

**3e**

2-(4-(4-fluorophenyl)-2-(trifluoromethyl)buta-2,3-dien-1-yl)-4,4,6,6-tetramethyl-1,3,2-dioxaborinane(**3e**): Yellow oil, yield = 71%, 0.0518 g

**$^1\text{H}$  NMR** (400 MHz, Chloroform-d)  $\delta$  7.39-7.35 (m, 2H), 7.03-6.99 (m, 2H), 6.46-6.43 (m, 1H), 1.78 (s, 2H), 1.75-1.69 (m, 2H), 1.31 (s, 6H), 1.26 (s, 6H);  **$^{13}\text{C}$  NMR** (126 MHz, Chloroform-d)  $\delta$  204.26-204.16 (m), 162.5 (d,  $J = 247.0$  Hz), 129.2 (d,  $J = 8.8$  Hz), 123.8 (q,  $J = 274.7$  Hz), 115.6 (d,  $J = 21.4$  Hz), 100.4 (q,  $J = 34.0$  Hz), 98.8, 71.2, 48.7, 31.7, 31.6;  **$^{19}\text{F}$  NMR** (471 MHz, Chloroform-d)  $\delta$  -64.95, -72.60, -111.09, -114.03;  **$^{11}\text{B}$  NMR** (128 MHz, Chloroform-d)  $\delta$  28.63; **HRMS** (ESI)  $m/z$  calcd for  $\text{C}_{18}\text{H}_{21}\text{BF}_4\text{O}_2\text{Na}$   $[\text{M}+\text{Na}]^+$ : 379.1463, found: 379.1477

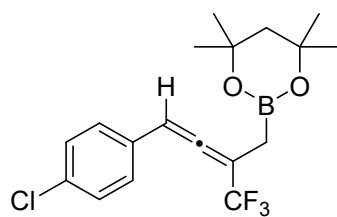

**3f**

2-(4-(4-chlorophenyl)-2-(trifluoromethyl)buta-2,3-dien-1-yl)-4,4,6,6-tetramethyl-1,3,2-

dioxaborinane(**3f**): Brownish-yellow oil, yield = 78%, 0.0580 g

**<sup>1</sup>H NMR** (500 MHz, Chloroform-d)  $\delta$  7.39-7.36 (m, 2H), 7.34-7.30 (m, 2H), 6.49-6.45 (m, 1H), 1.83 (s, 2H), 1.79-1.73 (m, 2H), 1.35 (s, 6H), 1.31 (s, 6H); **<sup>13</sup>C NMR** (126 MHz, Chloroform-d)  $\delta$  204.5 (q,  $J = 3.8$  Hz), 133.5, 131.4, 128.8 (d,  $J = 3.8$  Hz), 123.8 (q,  $J = 274.5$  Hz), 100.7 (q,  $J = 35.3$  Hz), 98.9, 71.2, 48.7, 31.7, 31.6; **<sup>19</sup>F NMR** (471 MHz, Chloroform-d)  $\delta$  -64.90, -72.54; **<sup>11</sup>B NMR** (128 MHz, Chloroform-d)  $\delta$  28.47; **HRMS** (ESI)  $m/z$  calcd for  $C_{18}H_{21}BClF_3O_2Na$   $[M+Na]^+$  : 395.1167, found: 395.1173

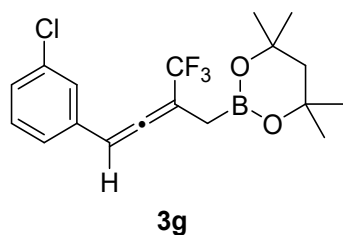

2-(4-(3-chlorophenyl)-2-(trifluoromethyl)buta-2,3-dien-1-yl)-4,4,6,6-tetramethyl-1,3,2-dioxaborinane(**3g**): Brownish-yellow oil, yield = 74%, 0.0551 g

**<sup>1</sup>H NMR** (400 MHz, Chloroform-d)  $\delta$  7.37 (s, 1H), 7.27-7.22 (m, 3H), 6.42 (m, 1H), 1.79 (s, 2H), 1.76-1.69 (m, 2H), 1.32 (s, 6H), 1.27 (s, 6H); **<sup>13</sup>C NMR** (126 MHz, Chloroform-d)  $\delta$  204.63 (q,  $J = 3.8$  Hz), 134.9, 134.7, 129.8, 127.9, 127.3, 125.8, 123.8 (q,  $J = 275.9$  Hz), 100.8 (q,  $J = 34.0$  Hz), 98.8, 71.2, 48.8, 31.7, 31.6; **<sup>19</sup>F NMR** (376 MHz, Chloroform-d)  $\delta$  -64.86, -72.51; **<sup>11</sup>B NMR** (128 MHz, Chloroform-d)  $\delta$  28.36; **HRMS** (ESI)  $m/z$  calcd for  $C_{18}H_{21}BClF_3O_2Na$   $[M+Na]^+$  : 395.1167, found: 395.1170

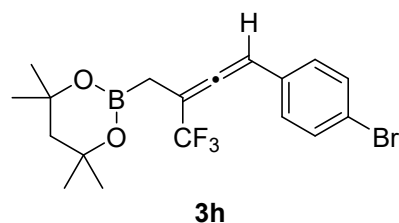

2-(4-(4-bromophenyl)-2-(trifluoromethyl)buta-2,3-dien-1-yl)-4,4,6,6-tetramethyl-1,3,2-dioxaborinane(**3h**): Yellow oil, yield = 63%, 0.0524 g

**<sup>1</sup>H NMR** (400 MHz, Chloroform-d)  $\delta$  7.45-7.43 (m, 2H), 7.29-7.26 (m, 2H), 6.43-6.41 (m, 1H), 1.79 (s, 2H), 1.75-1.68 (m, 2H), 1.31 (s, 6H), 1.27 (s, 6H); **<sup>13</sup>C NMR** (101 MHz, Chloroform-d)  $\delta$  204.5 (q,  $J = 4.2$  Hz), 131.7, 129.1, 123.7 (q,  $J = 275.7$  Hz), 121.6, 100.7 (q,  $J = 34.3$  Hz), 98.9, 71.2, 48.7, 31.7, 31.6; **<sup>19</sup>F NMR** (376 MHz, Chloroform-d)  $\delta$  -64.90, -72.53; **<sup>11</sup>B NMR** (128 MHz, Chloroform-d)  $\delta$  28.66; **HRMS** (ESI)  $m/z$  calcd for  $C_{18}H_{21}BBBrF_3O_2Na$   $[M+Na]^+$  : 439.0662, found: 439.0668

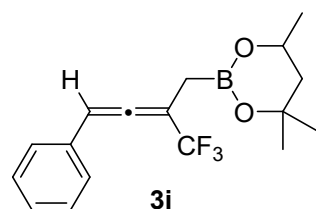

4,4,6-trimethyl-2-(4-phenyl-2-(trifluoromethyl)buta-2,3-dien-1-yl)-1,3,2-dioxaborinane(**3i**): Yellow oil, yield = 50%, 0.0324 g

**<sup>1</sup>H NMR** (400 MHz, Chloroform-d)  $\delta$  7.40-7.37 (m, 2H), 7.33-7.30 (m, 2H), 7.26-7.22 (m, 1H), 6.48-6.46 (m, 1H), 4.21-4.09 (m, 1H), 1.75-1.71 (m, 3H), 1.45-1.38 (m, 1H), 1.24 (d,  $J = 3.1$  Hz, 3H), 1.22 (s, 1H), 1.11-1.16 (m, 5H); **<sup>13</sup>C NMR** (101 MHz, Chloroform-d)  $\delta$  204.5-204. (m), 132.7, 128.6, 128.6, 127.8, 127.6, 127.5, 123.9 (q,  $J = 275.7$  Hz), 99.8, 99.0 (q,  $J = 35.1$  Hz), 71.3, 65.1, 65.1, 45.8, 45.7, 31.1, 31.0, 28.0, 27.9, 23.0, 22.9; **<sup>19</sup>F NMR** (376 MHz, Chloroform-d)  $\delta$  -64.94, -72.64; **<sup>11</sup>B NMR** (128 MHz, Chloroform-d)  $\delta$  28.82; **HRMS** (ESI)  $m/z$  calcd for C<sub>17</sub>H<sub>20</sub>BF<sub>3</sub>O<sub>2</sub>Na [M+Na]<sup>+</sup>: 347.1401, found: 347.1411

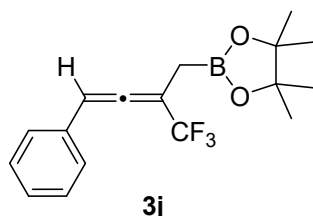

4,4,5,5-tetramethyl-2-(4-phenyl-2-(trifluoromethyl)buta-2,3-dien-1-yl)-1,3,2-dioxaborolane(**3j**): Yellow oil, yield = 57%, 0.0369 g

**<sup>1</sup>H NMR** (400 MHz, Chloroform-d)  $\delta$  7.31-7.29 (m, 2H), 7.27-7.22 (m, 2H), 7.20-7.17 (m, 1H), 6.47-6.44 (m, 1H), 1.83-1.73 (m, 2H), 1.14 (s, 6H), 1.11 (s, 6H); **<sup>13</sup>C NMR** (101 MHz, Chloroform-d)  $\delta$  204.4 (q,  $J = 4.0$  Hz), 131.8, 128.7, 128.2, 128.0, 127.7, 123.6 (q,  $J = 274.0$  Hz), 100.5, 99.0 (q,  $J = 35.1$  Hz), 83.9, 24.8, 24.7; **<sup>19</sup>F NMR** (376 MHz, Chloroform-d)  $\delta$  -65.19, -72.95; **<sup>11</sup>B NMR** (128 MHz, Chloroform-d)  $\delta$  32.07; **HRMS** (ESI)  $m/z$  calcd for C<sub>17</sub>H<sub>20</sub>BF<sub>3</sub>O<sub>2</sub>Na [M+Na]<sup>+</sup>: 347.1401, found: 347.1413

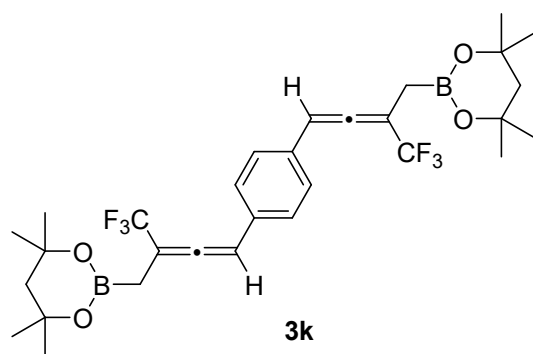

1,4-bis(4,4,4-trifluoro-3-((4,4,6,6-tetramethyl-1,3,2-dioxaborinan-2-yl)methyl)buta-1,2-dien-1-yl)benzene(**3k**): Pale yellow oil, yield = 55%, 0.0658 g

**<sup>1</sup>H NMR** (400 MHz, Chloroform-d)  $\delta$  7.34-7.33 (m, 4H), 6.47-6.45 (m, 2H), 1.77 (d,  $J = 2.7$  Hz, 4H), 1.74-1.68 (m, 4H), 1.30 (d,  $J = 2.2$  Hz, 12H), 1.26 (d,  $J = 3.3$  Hz, 12H); **<sup>13</sup>C NMR** (126 MHz, Chloroform-d)  $\delta$  204.7 (q,  $J = 5.0$  Hz), 132.3, 127.8, 123.9 (q,  $J = 274.7$  Hz), 100.3 (q,  $J = 35.3$  Hz), 99.6, 71.1, 48.7, 31.7, 31.7; **<sup>19</sup>F NMR** (376 MHz, Chloroform-d)  $\delta$  -64.89, -72.56; **<sup>11</sup>B NMR** (128 MHz, Chloroform-d)  $\delta$  28.30; **HRMS** (ESI)  $m/z$  calcd for C<sub>30</sub>H<sub>38</sub>B<sub>2</sub>F<sub>6</sub>O<sub>4</sub>Na [M+Na]<sup>+</sup>: 621.2753, found: 621.2766

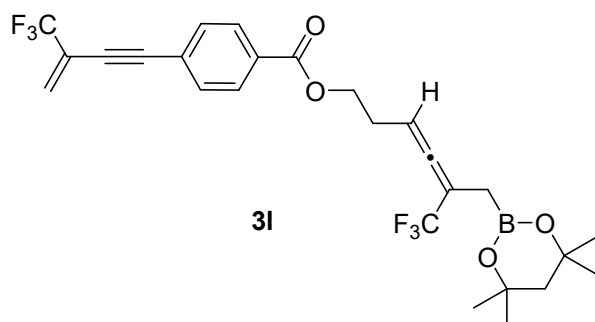

6,6,6-trifluoro-5-((4,4,6,6-tetramethyl-1,3,2-dioxaborinan-2-yl)methyl)hexa-3,4-dien-1-yl 4-(3-(trifluoromethyl)but-3-en-1-yn-1-yl)benzoate(**3l**): Pale yellow oil, yield = 50%, 0.0528 g

**<sup>1</sup>H NMR** (500 MHz, Chloroform-*d*)  $\delta$  8.01-7.98 (m, 2H), 7.49-7.46 (m, 2H), 6.52-6.50 (m, 1H), 6.01 (d,  $J$  = 1.3 Hz, 1H), 5.81 (s, 1H), 4.46 (t,  $J$  = 6.7 Hz, 2H), 2.84 (t,  $J$  = 6.7 Hz, 2H), 1.79 (s, 2H), 1.77-1.70 (m, 2H), 1.31 (s, 6H), 1.27 (s, 6H); **<sup>13</sup>C NMR** (101 MHz, Chloroform-*d*)  $\delta$  205.4 (q,  $J$  = 4.0 Hz), 166.0, 138.1, 130.0, 128.9, 127.5, 126.7 (q,  $J$  = 4.5 Hz), 125.1, 123.8 (q,  $J$  = 275.7 Hz), 122.7 (q,  $J$  = 35.4 Hz), 121.3 (q,  $J$  = 274.7 Hz), 101.0, 99.2, 97.9 (q,  $J$  = 35.0 Hz), 90.3, 74.8 (q,  $J$  = 2.2 Hz), 71.2, 62.1, 48.7, 31.6, 31.6, 20.0; **<sup>19</sup>F NMR** (376 MHz, Chloroform-*d*)  $\delta$  -64.83, -68.30, -72.45, -72.56; **<sup>11</sup>B NMR** (128 MHz, Chloroform-*d*)  $\delta$  28.18; **HRMS** (ESI)  $m/z$  calcd for C<sub>26</sub>H<sub>27</sub>B<sub>2</sub>F<sub>6</sub>O<sub>4</sub>Na [M+Na]<sup>+</sup>: 551.1799, found: 551.1821

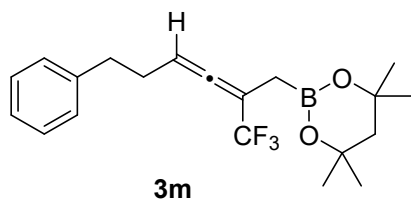

4,4,6,6-tetramethyl-2-(6-phenyl-2-(trifluoromethyl)hexa-2,3-dien-1-yl)-1,3,2-dioxaborinane(**3m**): Pale yellow oil, yield = 66%, 0.0480 g

**<sup>1</sup>H NMR** (400 MHz, Chloroform-*d*)  $\delta$  7.30 – 7.26 (m, 2H), 7.22 – 7.18 (m, 3H), 5.58 – 5.55 (m, 0.4H), 2.82 – 2.69 (m, 2H), 2.46 – 2.35 (m, 2H), 1.80 (s, 2H), 1.62 – 1.52 (m, 1H), 1.3 (s, 12H); **<sup>13</sup>C NMR** (101 MHz, Chloroform-*d*)  $\delta$  202.7 (q,  $J$  = 4.0 Hz), 141.5, 140.7, 128.5, 128.5, 128.4, 128.4, 126.3, 126.0, 124.3 (q,  $J$  = 275.7 Hz), 96.7 (q,  $J$  = 35.4 Hz), 96.3, 82.6, 70.9, 70.9, 48.8, 48.8, 35.2, 34.7, 31.7, 31.7, 31.7, 20.9; **<sup>19</sup>F NMR** (376 MHz, Chloroform-*d*)  $\delta$  -65.05, -72.95; **<sup>11</sup>B NMR** (128 MHz, Chloroform-*d*)  $\delta$  28.72; **HRMS** (ESI)  $m/z$  calcd for C<sub>20</sub>H<sub>26</sub>BF<sub>3</sub>O<sub>2</sub>Na [M+Na]<sup>+</sup>: 389.1870, found: 389.1883

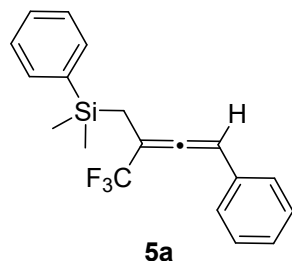

Dimethyl(phenyl)(4-phenyl-2-(trifluoromethyl)buta-2,3-dien-1-yl)silane(**5a**): Pale yellow oil, 64%, 0.0193 g

**<sup>1</sup>H NMR** (400 MHz, Chloroform-*d*)  $\delta$  7.47-7.45 (m, 2H), 7.33 – 7.23 (m, 6H), 7.15 – 7.12 (m, 2H), 6.37-6.34 (m, 1H), 1.87 – 1.79 (m, 2H), 0.34 (s, 3H), 0.33 (s, 3H); **<sup>13</sup>C NMR** (101 MHz, Chloroform-*d*)  $\delta$  204.6 (q,  $J$  = 4.0 Hz), 137.6, 133.6, 132.1, 129.3, 128.8, 128.0, 127.8, 127.4, 123.7

(q,  $J = 274.7$  Hz), 101.0, 99.7 (q,  $J = 34.3$  Hz), 14.5, -2.9;  $^{19}\text{F}$  NMR (376 MHz, Chloroform-d)  $\delta$  -64.73, -73.30; HRMS (ESI)  $m/z$  calcd for  $\text{C}_{19}\text{H}_{19}\text{F}_3\text{Si}$   $[\text{M}+\text{H}]^+$  :332.1203, found: 332.1210

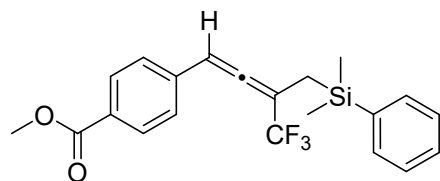

**5b**

Methyl 4-(3-((dimethyl(phenyl)silyl)methyl)-4,4,4-trifluorobuta-1,2-dien-1-yl)benzoate (**5b**): Pale yellow oil, 68%, 0.0193 g

$^1\text{H}$  NMR (400 MHz, Chloroform-d)  $\delta$  7.96 – 7.93 (m, 2H), 7.47 - 7.45 (m, 2H), 7.34 – 7.27 (m, 3H), 7.17 – 7.15 (m, 2H), 6.39-6.37 (m, 1H), 3.92 (s, 3H), 1.90 - 1.81 (m, 2H), 0.36 (s, 3H), 0.34 (s, 3H);  $^{13}\text{C}$  NMR (101 MHz, Chloroform-d)  $\delta$  205.4 (q,  $J = 4.1$  Hz), 166.7, 137.3, 137.0, 133.6, 130.0, 129.5, 129.4, 127.9, 127.2, 123.5 (q,  $J = 275.7$  Hz), 100.4, 100.3 (q,  $J = 35.4$  Hz), 52.2, 14.4, -2.9, -2.9;  $^{19}\text{F}$  NMR (376 MHz, Chloroform-d)  $\delta$  -64.66, -73.15; HRMS (ESI)  $m/z$  calcd for  $\text{C}_{21}\text{H}_{22}\text{F}_3\text{O}_2\text{Si}$   $[\text{M}+\text{H}]^+$  : 391.1336, found: 391.1341

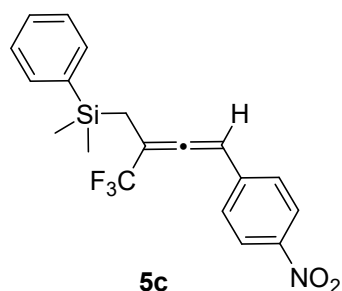

**5c**

Dimethyl(4-(4-nitrophenyl)-2-(trifluoromethyl)buta-2,3-dien-1-yl)(phenyl)silane (**5c**): Pale yellow oil, 64%, 0.0193 g

$^1\text{H}$  NMR (400 MHz, Chloroform-d)  $\delta$  7.54 – 7.50 (m, 2H), 7.45-7.43 (m, 2H), 7.33 – 7.24 (m, 3H), 7.13 – 7.10 (m, 2H), 6.35-6.33 (m, 1H), 1.90-1.82 (m, 2H), 0.36 (s, 3H), 0.34 (s, 3H);  $^{13}\text{C}$  NMR (101 MHz, Chloroform-d)  $\delta$  205.63 (q,  $J = 4.0$  Hz), 137.2, 137.0, 133.6, 132.5, 129.4, 127.9, 127.8, 123.4 (q,  $J = 275.7$  Hz), 118.8, 111.2, 100.6 (q,  $J = 35.4$  Hz), 99.9, 14.4, -2.8, -2.9;  $^{19}\text{F}$  NMR (376 MHz, Chloroform-d)  $\delta$  -64.61, -72.62; HRMS (ESI)  $m/z$  calcd for  $\text{C}_{19}\text{H}_{19}\text{F}_3\text{NO}_2\text{Si}$   $[\text{M}+\text{H}]^+$  : 378.1132, found: 378.1151

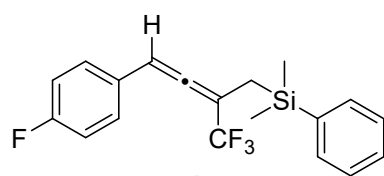

**5d**

(4-(4-fluorophenyl)-2-(trifluoromethyl)buta-2,3-dien-1-yl)dimethyl(phenyl)silane (**5d**): Yellow oil, yield = 80%, 0.0280 g

$^1\text{H}$  NMR (500 MHz, Chloroform-d)  $\delta$  7.49-7.45 (m, 2H), 7.35-7.29 (m, 3H), 7.09 -7.06 (m, 2H), 7.00-6.95 (m, 2H), 6.35-6.33 (m, 1H), 1.88-1.82 (m, 2H), 0.36 (s, 3H), 0.34 (s, 3H);  $^{13}\text{C}$  NMR (101



MHz, Chloroform-d)  $\delta$  206.6 (q,  $J = 2.0$  Hz), 164.8 (d,  $J = 248.5$  Hz), 139.8, 135.9, 131.6, 131.3 (d,  $J = 8.1$  Hz), 130.2, 125.9 (q,  $J = 274.7$  Hz), 118.1 (d,  $J = 22.2$  Hz), 102.3, 102.3 (q,  $J = 34.8$  Hz), 16.8, -0.52, -0.60;  $^{19}\text{F}$  NMR (471 MHz, Chloroform-d)  $\delta$  -64.79, -73.29, -110.47, -113.46; HRMS (ESI)  $m/z$  calcd for  $\text{C}_{19}\text{H}_{19}\text{F}_4\text{Si}$   $[\text{M}+\text{H}]^+$  : 351.1187, found: 351.1194

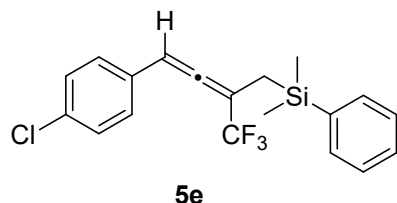

(4-(4-chlorophenyl)-2-(trifluoromethyl)buta-2,3-dien-1-yl)dimethyl(phenyl)silane(**5e**): Yellow oil, yield = 77%, 0.0281 g

$^1\text{H}$  NMR (400 MHz, Chloroform-d)  $\delta$  7.48-7.44 (m, 2H), 7.35-7.27 (m, 3H), 7.26-7.22 (m, 2H), 7.04-7.00 (m, 2H), 6.32-6.30 (m, 1H), 1.88-1.80 (m, 2H), 0.35 (s, 3H), 0.33 (s, 3H);  $^{13}\text{C}$  NMR (101 MHz, Chloroform-d)  $\delta$  204.6 (q,  $J = 4.0$  Hz), 137.4, 133.7, 133.6, 130.6, 129.3, 128.9, 128.5, 127.9, 123.5 (q,  $J = 275.7$  Hz), 100.2 (q,  $J = 35.4$  Hz), 100.0, 14.5, -2.8, -2.9;  $^{19}\text{F}$  NMR (376 MHz, Chloroform-d)  $\delta$  -64.77; HRMS (ESI)  $m/z$  calcd for  $\text{C}_{19}\text{H}_{19}\text{ClF}_3\text{Si}$   $[\text{M}+\text{H}]^+$  : 367.0891, found: 367.0923

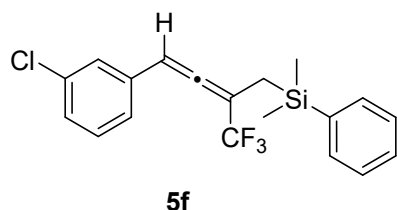

(4-(3-chlorophenyl)-2-(trifluoromethyl)buta-2,3-dien-1-yl)dimethyl(phenyl)silane(**5f**): Pale yellow oil, yield = 99%, 0.0362 g

$^1\text{H}$  NMR (400 MHz, Chloroform-d)  $\delta$  7.48-7.45 (m, 2H), 7.33-7.27 (m, 3H), 7.23-7.20 (m, 2H), 7.10-7.09 (m, 1H), 7.01 - 6.96 (m, 1H), 6.30-6.28 (m, 1H), 1.89-1.81 (m, 2H), 0.36 (s, 3H), 0.34 (s, 3H);  $^{13}\text{C}$  NMR (101 MHz, Chloroform-d)  $\delta$  204.7 (q,  $J = 3.0$  Hz), 137.3, 134.7, 133.6, 129.9, 129.3, 128.1, 127.8, 127.2, 125.5, 123.5 (q,  $J = 275.7$  Hz), 100.4 (q,  $J = 34.3$  Hz), 100.0, 14.4, -2.9, -3.0;  $^{19}\text{F}$  NMR (376 MHz, Chloroform-d)  $\delta$  -64.76, -73.22; HRMS (ESI)  $m/z$  calcd for  $\text{C}_{19}\text{H}_{19}\text{ClF}_3\text{Si}$   $[\text{M}+\text{H}]^+$  : 367.0891, found: 367.0915

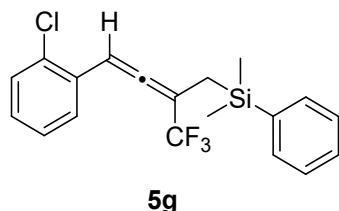

(4-(2-chlorophenyl)-2-(trifluoromethyl)buta-2,3-dien-1-yl)dimethyl(phenyl)silane(**5g**): Amber oil, yield = 96%, 0.0351 g

$^1\text{H}$  NMR (400 MHz, Chloroform-d)  $\delta$  7.48-7.45 (m, 2H), 7.35 - 7.27 (m, 4H), 7.20 - 7.13 (m, 3H), 6.823-6.80 (m, 1H), 1.88-1.81 (m, 2H), 0.36 (s, 3H), 0.34 (s, 3H);  $^{13}\text{C}$  NMR (101 MHz, Chloroform-

d)  $\delta$  205.4 (q,  $J = 4$  Hz), 137.3, 133.6, 132.6, 129.8, 129.3, 129.1, 128.9, 127.8, 127.0, 123.6 (q,  $J = 275.7$  Hz), 100.4 (q,  $J = 35.4$  Hz), 97.4, 14.5, -2.9, -3.0;  $^{19}\text{F}$  NMR (376 MHz, Chloroform-d)  $\delta$  -64.69; HRMS (ESI)  $m/z$  calcd for  $\text{C}_{19}\text{H}_{19}\text{ClF}_3\text{Si}$   $[\text{M}+\text{H}]^+$ : 367.0891, found: 367.0911

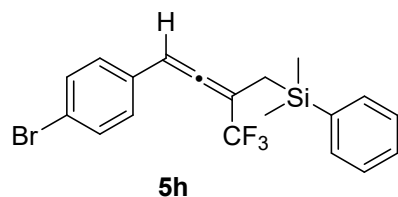

(4-(4-bromophenyl)-2-(trifluoromethyl)buta-2,3-dien-1-yl)dimethyl(phenyl)silane(**5h**): Pale yellow oil, yield = 77%, 0.0316 g

$^1\text{H}$  NMR (400 MHz, Chloroform-d)  $\delta$  7.48-7.45 (m, 2H), 7.41 – 7.38 (m, 2H), 7.35-7.28 (m 3H), 6.98 – 6.95(m, 2H), 6.31-6.29 (m, 1H), 1.88-1.81 (m, 2H), 0.35 (s, 3H), 0.34 (s, 3H);  $^{13}\text{C}$  NMR (126 MHz, Chloroform-d)  $\delta$  204.6 (q,  $J = 3.0$  Hz), 137.4, 133.6, 131.9, 129.4, 128.9, 127.9, 123.5 (q,  $J = 274.7$  Hz), 121.9, 100.3 (q,  $J = 35.3$  Hz), 100.1, 14.5, -2.8, -2.9;  $^{19}\text{F}$  NMR (376 MHz, Chloroform-d)  $\delta$  -64.74 – -64.76 (m), -73.22; HRMS (ESI)  $m/z$  calcd for  $\text{C}_{19}\text{H}_{19}\text{BrF}_3\text{Si}$   $[\text{M}+\text{H}]^+$ : 411.0386, found: 411.0397

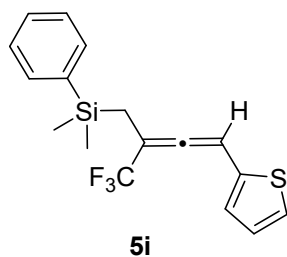

Dimethyl(phenyl)(4-(thiophen-2-yl)-2-(trifluoromethyl)buta-2,3-dien-1-yl)silane(**5i**): Pale yellow oil, yield = 77%, 0.0260 g

$^1\text{H}$  NMR (500 MHz, Chloroform-d)  $\delta$  7.55 – 7.53 (m, 2H), 7.40 – 7.36 (m, 3H), 7.30 – 7.27 (m, 1H), 7.02-7.00 (m, 1H), 6.95-6.94 (m, 1H), 6.65-6.63 (m, 1H), 1.89-1.88 (m, 2H), 0.43 (s, 3H), 0.42 (s, 3H);  $^{13}\text{C}$  NMR (126 MHz, Chloroform-d)  $\delta$  204.1 (q,  $J = 3.8$  Hz), 137.7, 135.8, 133.6, 129.3, 127.9, 127.6, 126.7, 126.2, 123.4 (q,  $J = 275.9$  Hz), 99.9 (q,  $J = 35.3$  Hz), 95.10, 14.76, -2.92;  $^{19}\text{F}$  NMR (471 MHz, Chloroform-d)  $\delta$  -64.99, -73.09; HRMS (ESI)  $m/z$  calcd for  $\text{C}_{17}\text{H}_{18}\text{F}_3\text{SSi}$   $[\text{M}+\text{H}]^+$ : 339.0845, found: 339.0886.

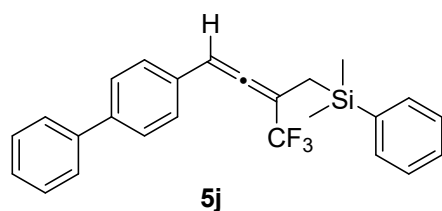

(4-([1,1'-biphenyl]-4-yl)-2-(trifluoromethyl)buta-2,3-dien-1-yl)dimethyl(phenyl)silane(**5j**): Pale yellow oil, yield = 66%, 0.0269 g

$^1\text{H}$  NMR (400 MHz, Chloroform-d)  $\delta$  7.52 – 7.50 (m, 2H), 7.45 – 7.35 (m, 6H), 7.29 – 7.21 (m, 4H), 7.13 – 7.11 (m, 2H), 6.34 - 6.32 (m, 1H), 1.82 – 1.74 (m, 2H), 0.29 (s, 3H), 0.27 (s, 3H);  $^{13}\text{C}$  NMR (101 MHz, Chloroform-d)  $\delta$  204.8 (q,  $J = 4.0$  Hz), 140.9, 140.6, 137.6, 133.6, 131.1, 129.3, 127.9, 127.8, 127.5, 127.0, 123.7 (q,  $J = 275.7$  Hz), 100.6, 99.8 (q,  $J = 35.4$  Hz), 14.5, -2.8, -2.9;

$^{19}\text{F}$  NMR (376 MHz, Chloroform-d)  $\delta$  -64.69; HRMS (ESI)  $m/z$  calcd for  $\text{C}_{25}\text{H}_{23}\text{F}_3\text{Si}$   $[\text{M}+\text{H}]^+$  : 408.1521, found: 408.1537

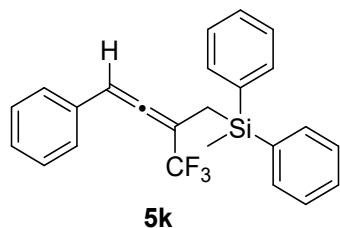

**5k**

Methyl(diphenyl(4-phenyl-2-(trifluoromethyl)buta-2,3-dien-1-yl)silane(**5k**): Pale yellow oil, yield = 50%, 0.0197 g

$^1\text{H}$  NMR (400 MHz, Chloroform-d)  $\delta$  7.50 – 7.7 (m, 4H), 7.35 – 7.28 (m, 6H), 7.23 – 7.21 (m, 3H), 7.00 - 6.98 (m, 2H), 6.20 - 6.17 (m, 1H), 2.21 – 2.12 (m, 2H), 0.63 (s, 3H);  $^{13}\text{C}$  NMR (101 MHz, Chloroform-d)  $\delta$  204.9 (q,  $J = 4.0$  Hz), 135.7, 134.5, 134.4, 131.9, 131.7, 129.5 (d,  $J = 2.0$  Hz), 128.6, 127.9, 127.4, 123.7 (q,  $J = 275.7$  Hz), 99.1 (q,  $J = 35.4$  Hz), 12.80, -4.35;  $^{19}\text{F}$  NMR (376 MHz, Chloroform-d)  $\delta$  -64.94, -73.24; HRMS (ESI)  $m/z$  calcd for  $\text{C}_{24}\text{H}_{22}\text{F}_3\text{Si}$   $[\text{M}+\text{H}]^+$  : 395.1437, found: 395.1459

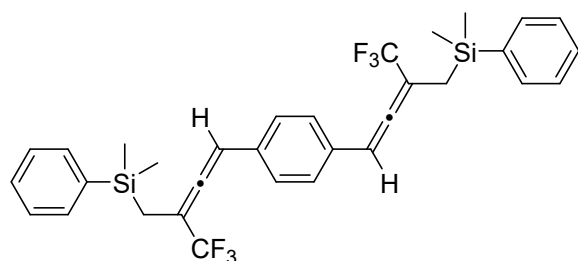

**5l**

1,4-bis(3-((dimethyl(phenyl)silyl)methyl)-4,4,4-trifluorobuta-1,2-dien-1-yl)benzene(**5l**): Pale yellow oil, yield = 73%, 0.0428 g

$^1\text{H}$  NMR (400 MHz, Chloroform-d)  $\delta$  7.49-7.45 (m, 4H), 7.3 – 7.28 (m, 6H), 7.06 - 7.01 (m, 4H), 6.35-6.33(m, H), 1.88 – 1.81 (m, 4H), 0.36 (s, 6H), 0.34 (s, 3H), 0.34 (s, 3H);  $^{13}\text{C}$  NMR (101 MHz, Chloroform-d)  $\delta$  204.93 – 204.76 (m), 137.5, 137.5, 133.6, 132.1, 129.3, 127.9, 127.8, 127.7, 123.8(q,  $J = 274.7$  Hz), 100.6, 99.9 (q,  $J = 34.4$  Hz), 14.5, -2.9;  $^{19}\text{F}$  NMR (376 MHz, Chloroform-d)  $\delta$  -64.74, -73.25; HRMS (ESI)  $m/z$  calcd for  $\text{C}_{32}\text{H}_{33}\text{F}_6\text{Si}_2$   $[\text{M}+\text{H}]^+$  : 587.2019, found: 587.2033

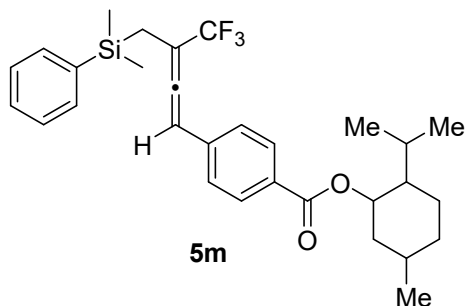

**5m**

2-isopropyl-5-methylcyclohexyl 4-(3-((dimethyl(phenyl)silyl)methyl)-4,4,4-trifluorobuta-1,2-dien-1-yl)benzoate(**5m**): Pale yellow oil, yield = 60%, 0.0308 g

$^1\text{H}$  NMR (400 MHz, Chloroform-d)  $\delta$  7.97 – 7.93 (m, 2H), 7.47 – 7.45 (m, 2H), 7.33 – 7.27 (m, 2H), 7.19-7.14 (m, 2H), 6.40 - 6.37 (m, 1H), 4.96 - 4.90 (m, 1H), 2.16 – 2.12 (m, 1H), 1.98 – 1.85

(m, 3H), 1.76-1.72 (m, 2H), 1.60 – 1.53 (m, 2H), 1.17 – 1.08 (m, 2H), 0.95 – 0.92 (m, 9H), 0.82-0.79 (m, 4H), 0.36 (s, 3H), 0.34 (s, 2H), 0.34 (s, 1H);  $^{13}\text{C}$  NMR (126 MHz, Chloroform-d)  $\delta$  205.5 (d,  $J = 3.7$  Hz), 165.8, 137.3, 136.8, 133.6, 130.0, 129.4, 127.9, 127.2, 126.4, 123.6 (q,  $J = 272.5$  Hz), 100.4, 100.3 (q,  $J = 35.3$  Hz), 75.0, 47.3, 41.0, 34.4, 31.5, 26.6, 23.7, 22.1, 20.8, 16.7, 14.5, -2.8, -2.9;  $^{19}\text{F}$  NMR (376 MHz, Chloroform-d)  $\delta$  -64.68, -72.38; HRMS (ESI)  $m/z$  calcd for  $\text{C}_{30}\text{H}_{38}\text{F}_3\text{O}_2\text{Si}$   $[\text{M}+\text{H}]^+$  :515.2588, found: 515.2594

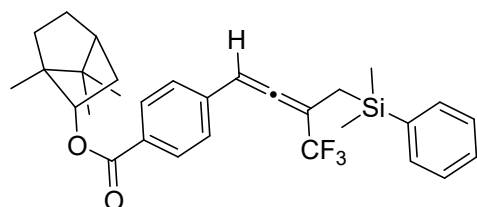

**5n**

1,7,7-trimethylbicyclo[2.2.1]heptan-2-yl 4-(3-((dimethyl(phenyl)silyl)methyl)-4,4,4-trifluorobuta-1,2-dien-1-yl)benzoate(**5n**): Pale yellow oil, yield = 55%, 0.0282 g

$^1\text{H}$  NMR (500 MHz, Chloroform-d)  $\delta$  7.98-7.95 (m, 2H), 7.47 – 7.46 (m, 2H), 7.35 – 7.28 (m, 3H), 7.19-7.16 (m, 2H), 6.40-6.38 (m, 1H), 5.13-5.10 (m, 1H), 2.51-2.46 (m, 1H), 2.15 – 2.10 (m, 1H), 1.85 (t,  $J = 2.9$  Hz, 2H), 1.80-1.74 (m, 2H), 1.36 – 1.28 (m, 2H), 1.14-1.10 (m, 1H), 0.97 (s, 3H), 0.94 – 0.92 (s, 6H), 0.36 (s, 3H), 0.34 (s, 3H);  $^{13}\text{C}$  NMR (126 MHz, Chloroform-d)  $\delta$  205.5 (q,  $J = 3.8$  Hz), 166.5, 137.3, 136.8, 133.6, 131.7, 130.0, 129.4, 127.9, 127.3, 126.4, 123.6 (q,  $J = 274.7$  Hz), 100.5 (q,  $J = 35.3$  Hz), 100.4, 80.7, 49.2, 48.0, 45.0, 37.0, 28.2, 27.5, 19.8, 19.0, 14.4, 13.7, -2.8, -2.9;  $^{19}\text{F}$  NMR (471 MHz, Chloroform-d)  $\delta$  -64.66, -72.35; HRMS (ESI)  $m/z$  calcd for  $\text{C}_{30}\text{H}_{36}\text{F}_3\text{O}_2\text{Si}$   $[\text{M}+\text{H}]^+$  :513.2431, found: 513.2437

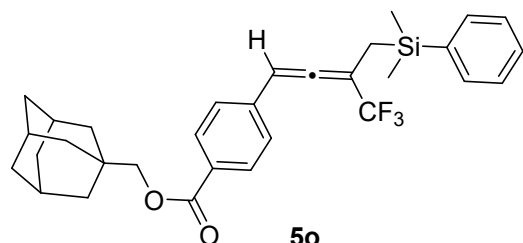

**5o**

((1s,3s)-adamantan-1-yl)methyl 4-(3-((dimethyl(phenyl)silyl)methyl)-4,4,4-trifluorobuta-1,2-dien-1-yl)benzoate(**5o**): Pale yellow oil, yield = 77%, 0.0299 g

$^1\text{H}$  NMR (400 MHz, Chloroform-d)  $\delta$  7.90 – 7.88 (m, 2H), 7.47-7.45 (m, 2H), 7.35 – 7.30 (m, 3H), 7.16 – 7.14 (m, 2H), 6.39-6.36 (m, 1H), 2.26 (s, 7H), 1.85-1.84 (m, 2H), 1.76 – 1.68 (m, 8H), 1.38 – 1.24 (m, 2H), 0.35 (s, 3H), 0.33 (s, 3H);  $^{13}\text{C}$  NMR (101 MHz, Chloroform-d)  $\delta$  205.3 (q,  $J = 3.9$  Hz), 165.1, 137.4, 136.3, 133.6, 131.5, 129.9, 129.3, 127.9, 127.1, 123.5 (q,  $J = 123.5$  Hz), 100.5, 100.2 (q,  $J = 35.4$  Hz), 81.2, 41.4, 36.3, 30.9, 14.4, -2.9;  $^{19}\text{F}$  NMR (376 MHz, Chloroform-d)  $\delta$  -64.70, -72.39; HRMS (ESI)  $m/z$  calcd for  $\text{C}_{31}\text{H}_{36}\text{F}_3\text{O}_2\text{Si}$   $[\text{M}+\text{H}]^+$  :525.2431, found: 525.2449

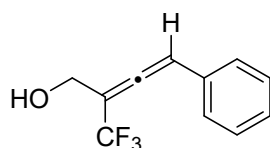

**8a**

4-phenyl-2-(trifluoromethyl)buta-2,3-dien-1-ol(**8a**): pale yellow oil, yield = 88%, 0.0214 g

$^1\text{H NMR}$  (400 MHz, Chloroform- $d$ )  $\delta$  7.39 – 7.29 (m, 5H), 6.76-6.74 (m, 1H), 4.45-4.38 (m, 2H), 1.85 (s, 1H);  $^{13}\text{C NMR}$  (126 MHz, Chloroform- $d$ )  $\delta$  204.32 – 204.09 (m), 130.99, 129.06, 128.78, 127.62, 123.0 (q,  $J = 276.0$  Hz), 103.3 (q,  $J = 33.1$  Hz), 102.75, 58.97;  $^{19}\text{F NMR}$  (471 MHz, Chloroform- $d$ )  $\delta$  -62.16; **HRMS** (ESI)  $m/z$  calcd for  $\text{C}_{11}\text{H}_{10}\text{F}_3\text{O} [\text{M}+\text{H}]^+$ : 215.0678, found: 215.0684

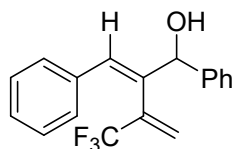

**9a**

(*E*)-2-benzylidene-1-phenyl-3-(trifluoromethyl)but-3-en-1-ol (**9a**): Pale yellow oil, yield = 77%, 0.0234 g

$^1\text{H NMR}$  (500 MHz, Chloroform- $d$ )  $\delta$  7.42 – 7.33 (m, 6H), 7.32 – 7.27 (m, 3H), 7.25 – 7.21 (m, 1H), 7.06 (s, 1H), 5.78 – 5.77 (d,  $J = 5$  Hz, 1H), 5.44 (s, 1H), 4.99 (s, 1H);  $^{13}\text{C NMR}$  (126 MHz, Chloroform- $d$ )  $\delta$  140.8, 136.8, 135.7, 135.3 (q,  $J = 31.5$  Hz), 131.0, 129.0, 128.6, 128.2, 128.2, 127.7, 127.3, 126.0 (q,  $J = 5.0$  Hz), 123.0 (q,  $J = 274.7$  Hz), 76.5;  $^{19}\text{F NMR}$  (471 MHz, Chloroform- $d$ )  $\delta$  -64.35; **HRMS** (ESI)  $m/z$  calcd for  $\text{C}_{18}\text{H}_{15}\text{F}_3\text{ONa} [\text{M}+\text{Na}]^+$ : 327.0667, found: 327.0688

## 4. Copies of the NMR spectra

### 4,4,6,6-tetramethyl-2-(4-phenyl-2-(trifluoromethyl)buta-2,3-dien-1-yl)-1,3,2-dioxaborinane(3a)

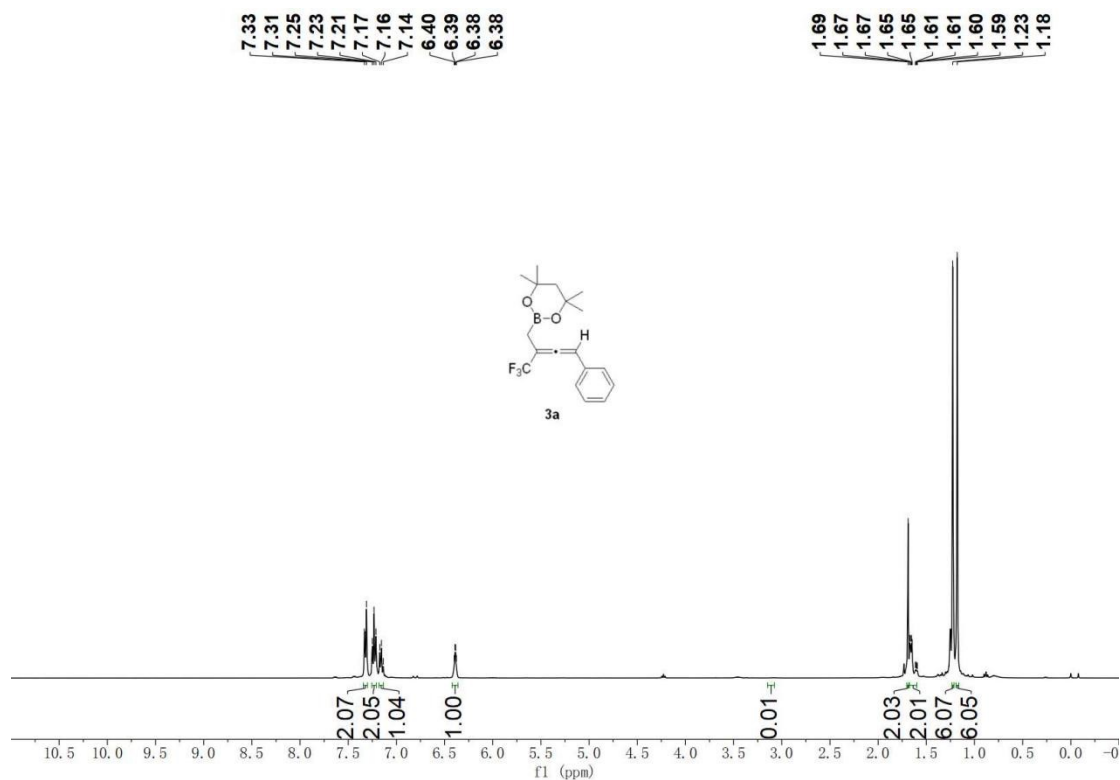

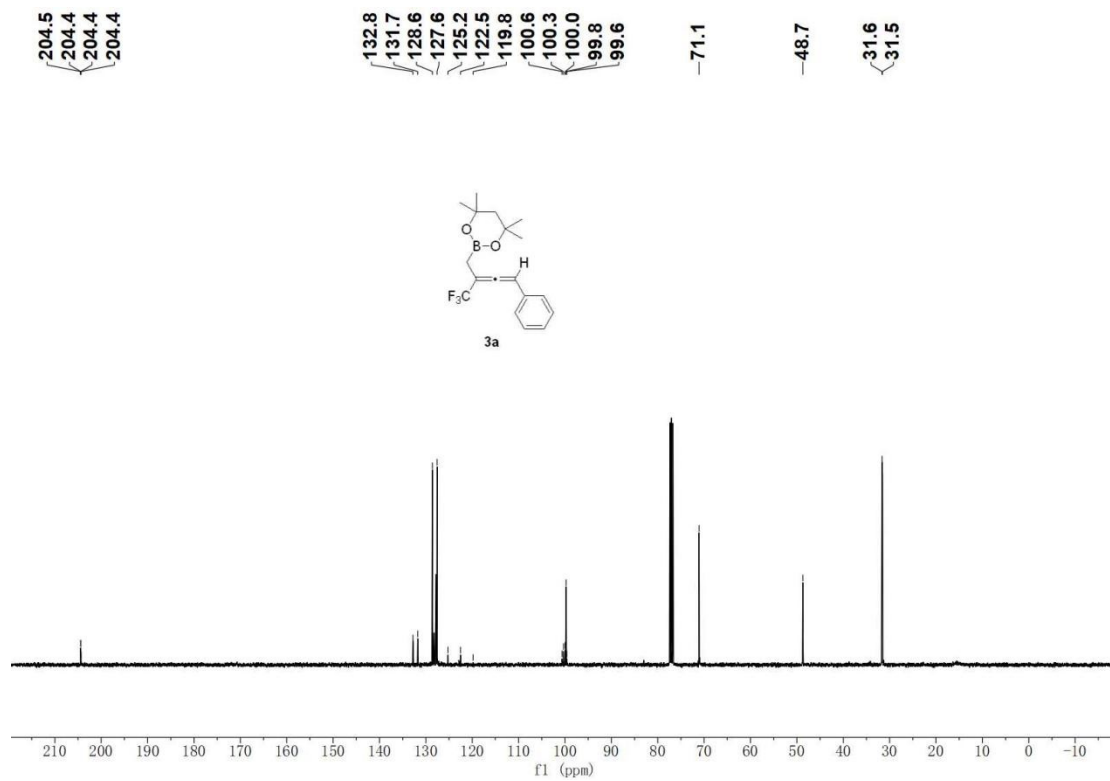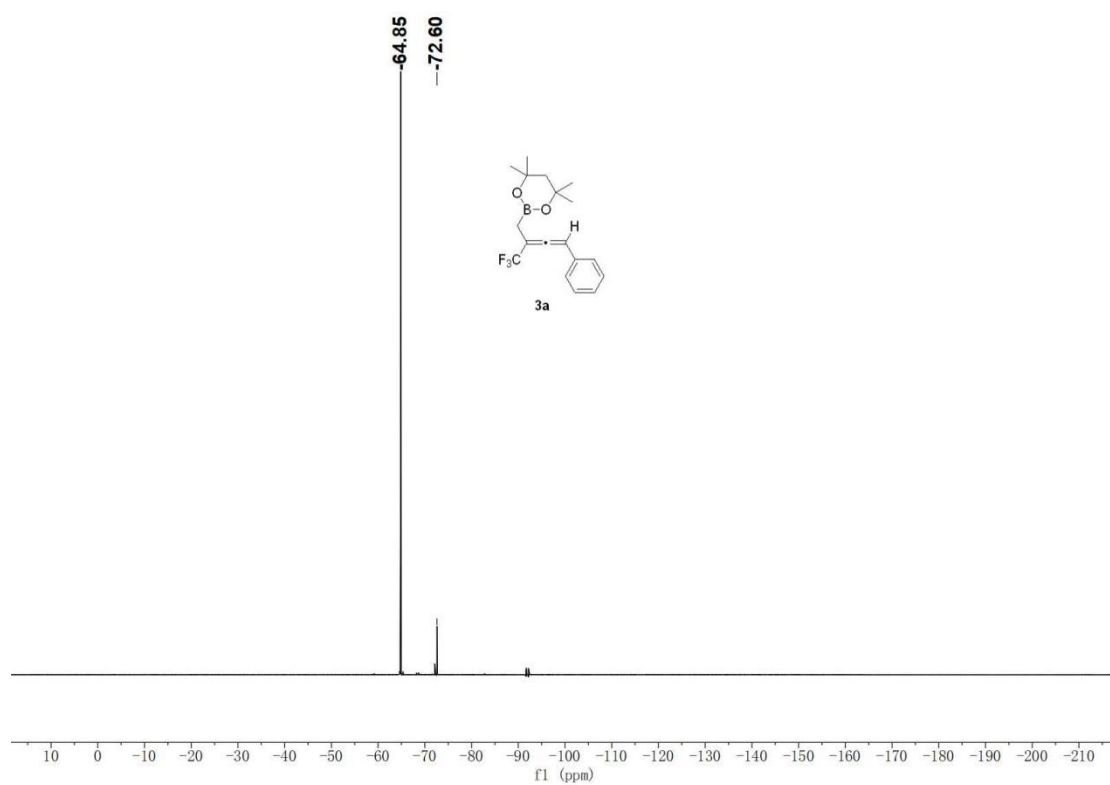

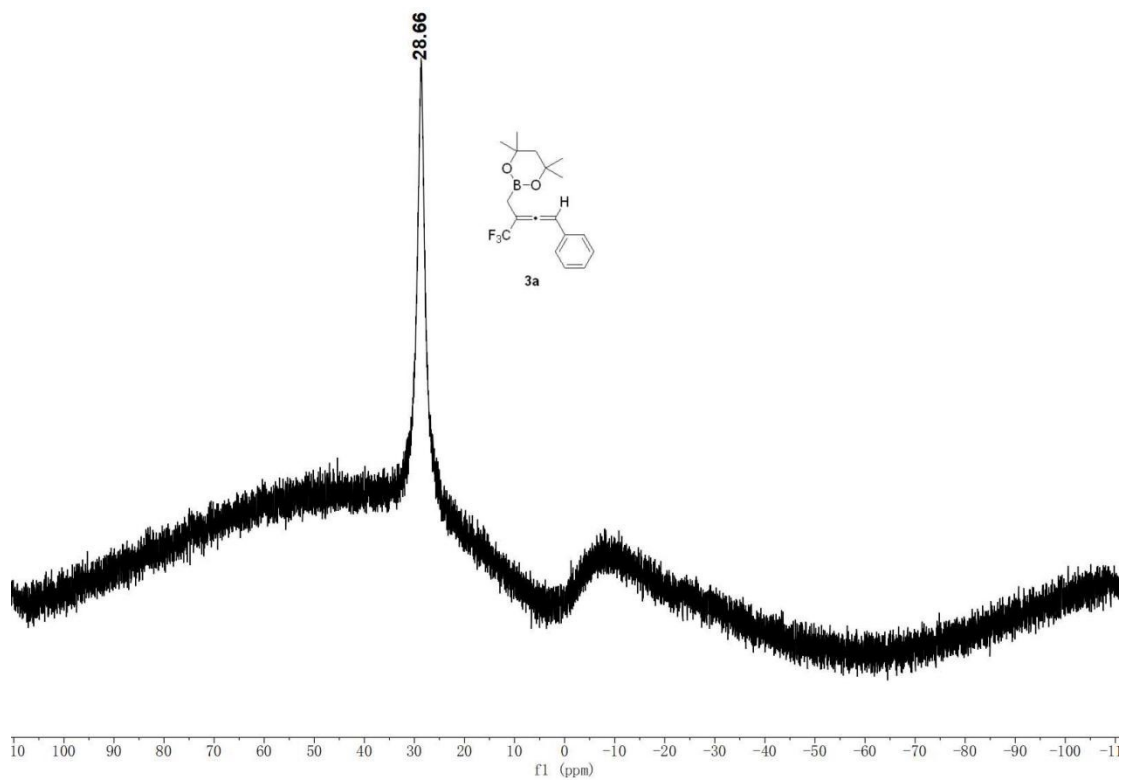

**2-(4-(4-methoxyphenyl)-2-(trifluoromethyl)buta-2,3-dien-1-yl)-4,4,6,6-tetramethyl-1,3,2-dioxaborinane(3b)**

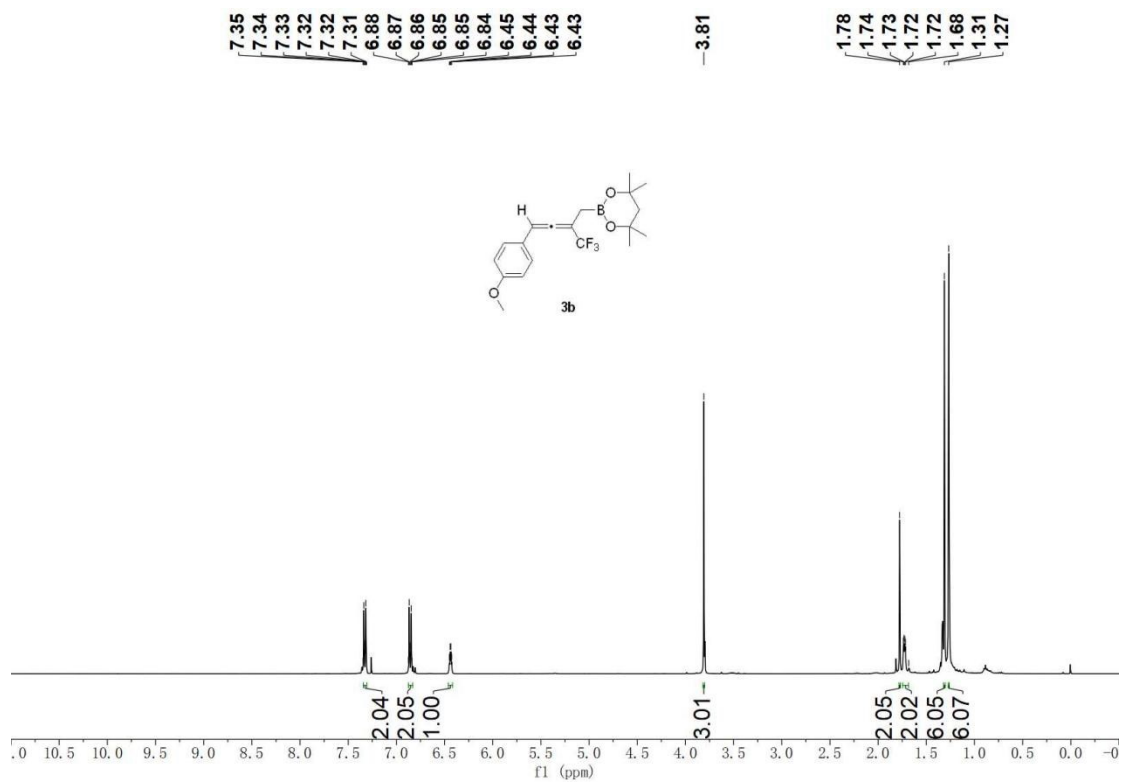

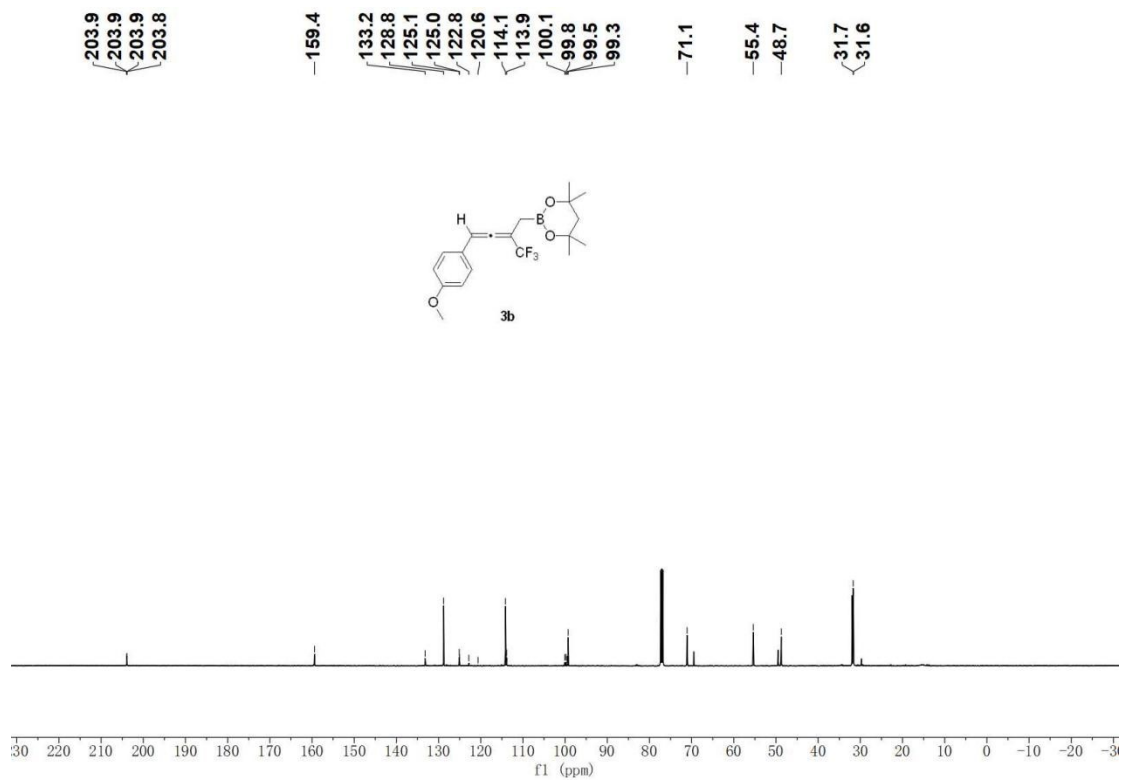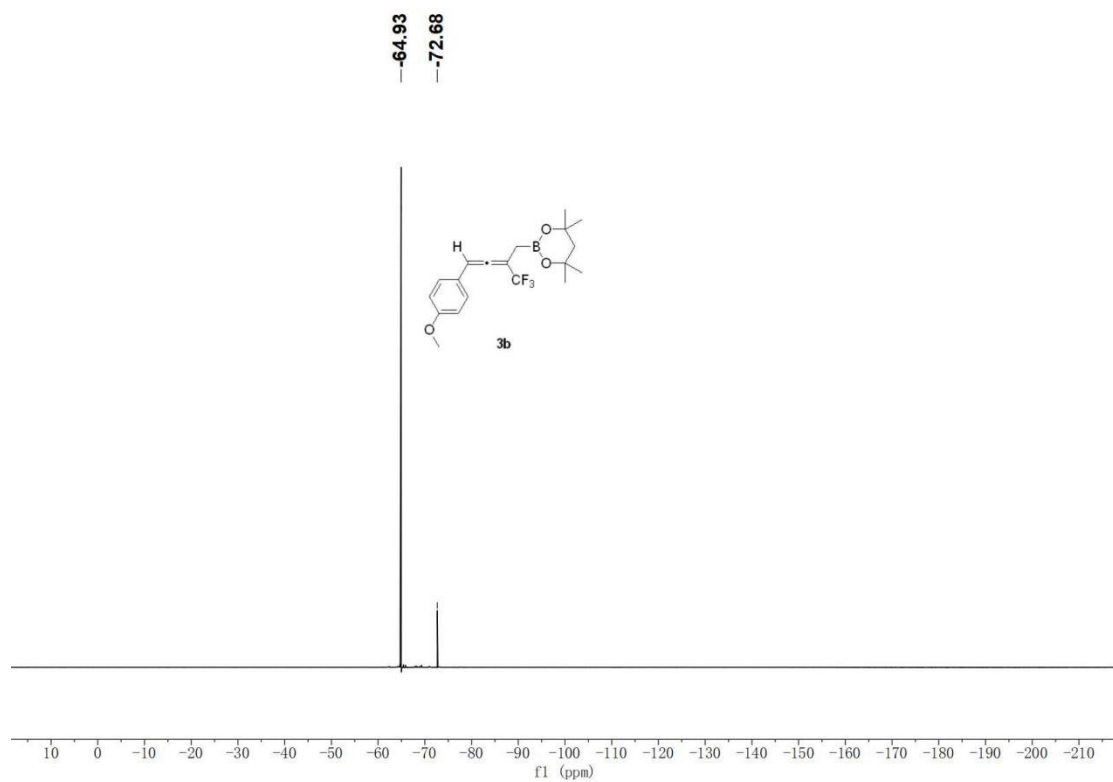



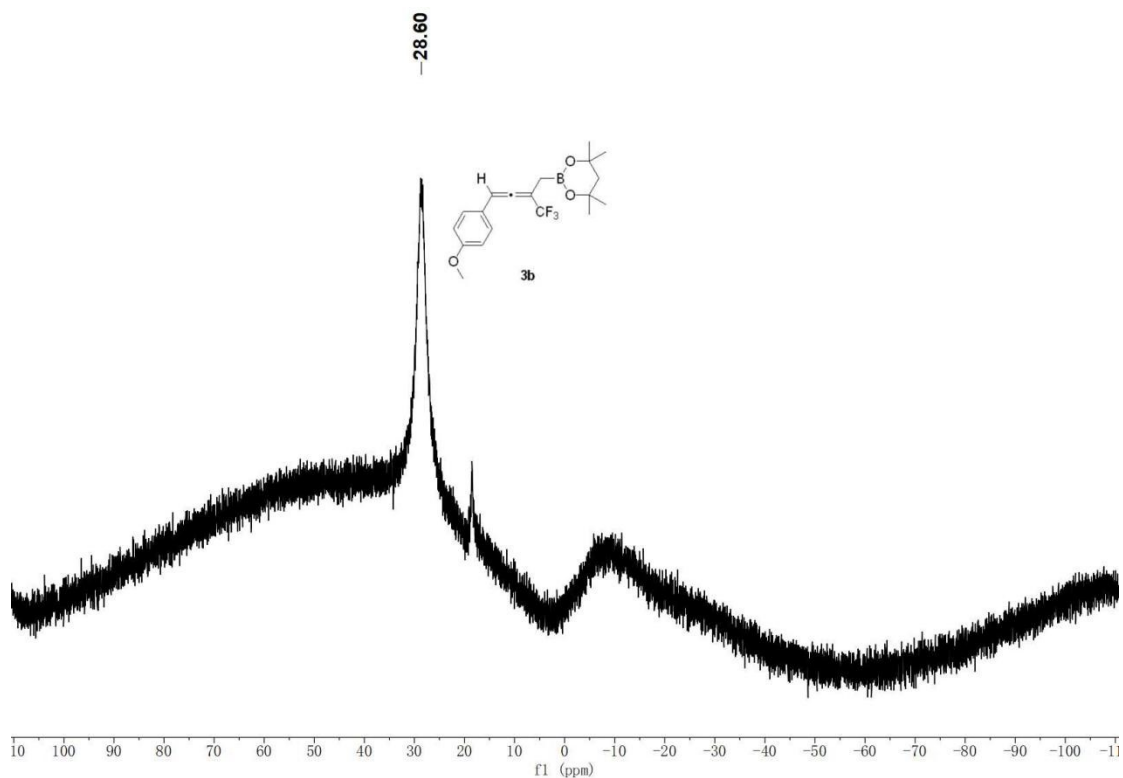

**4,4,6,6-tetramethyl-2-(4-(p-tolyl)-2-(trifluoromethyl)buta-2,3-dien-1-yl)-1,3,2-dioxaborinane (3c)**

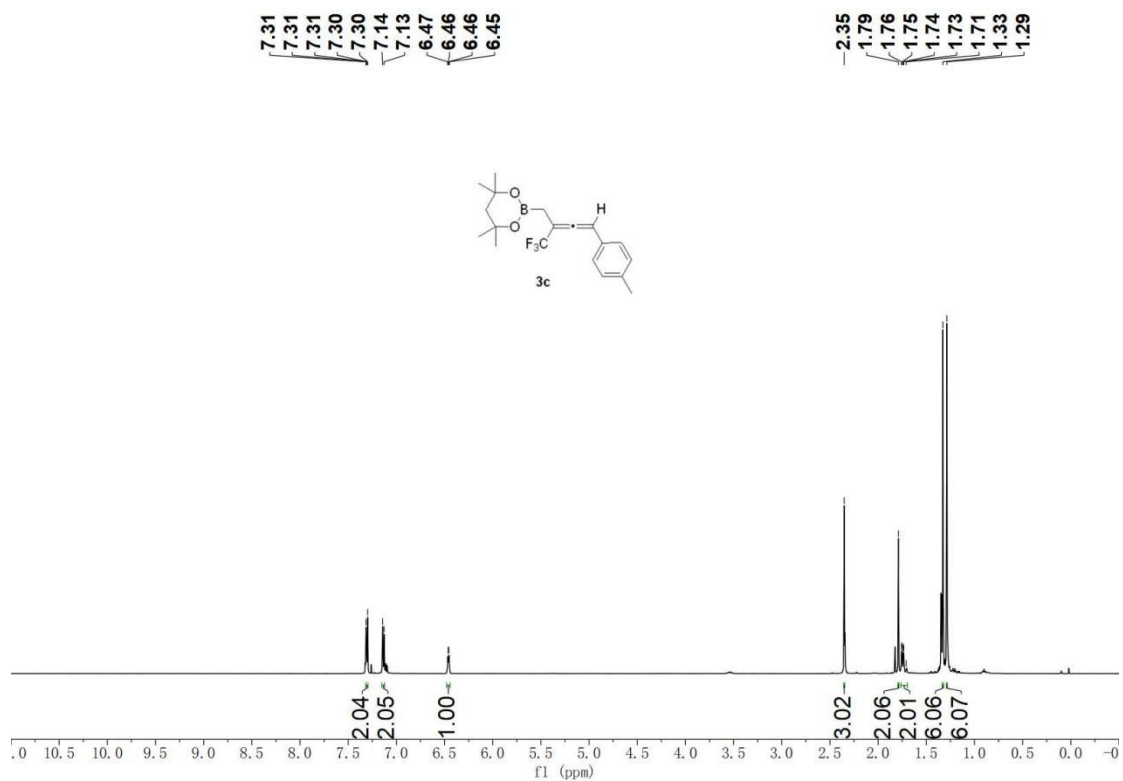

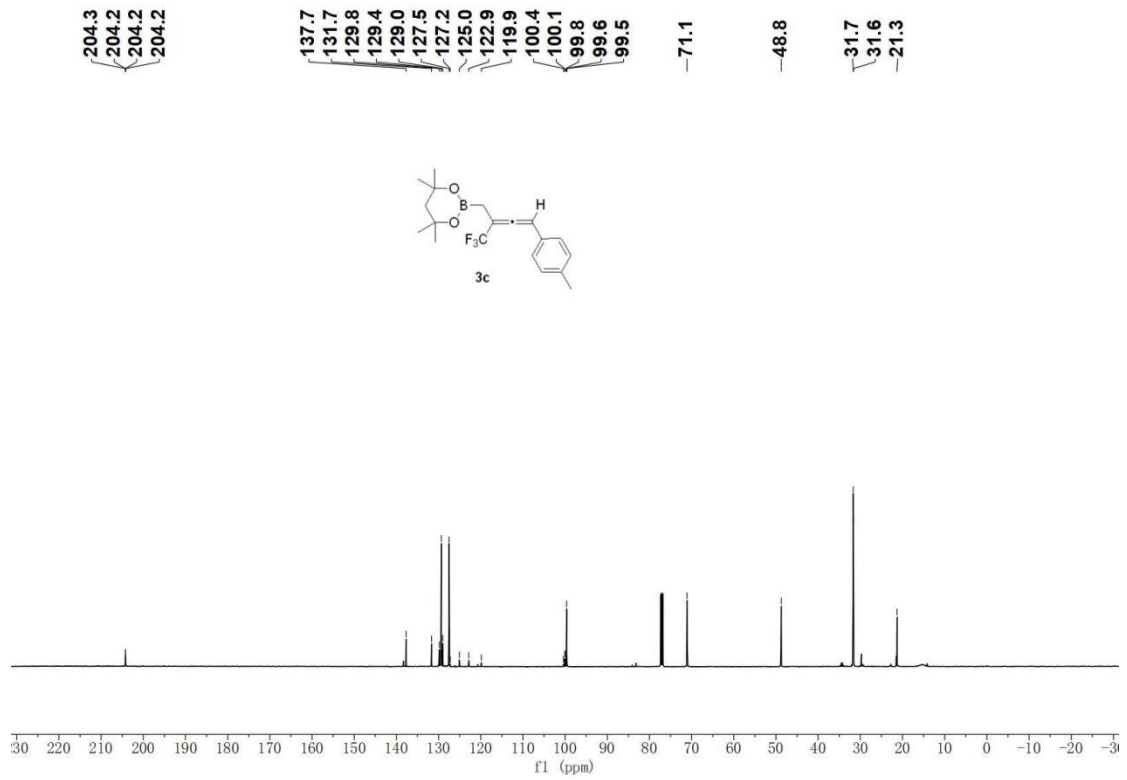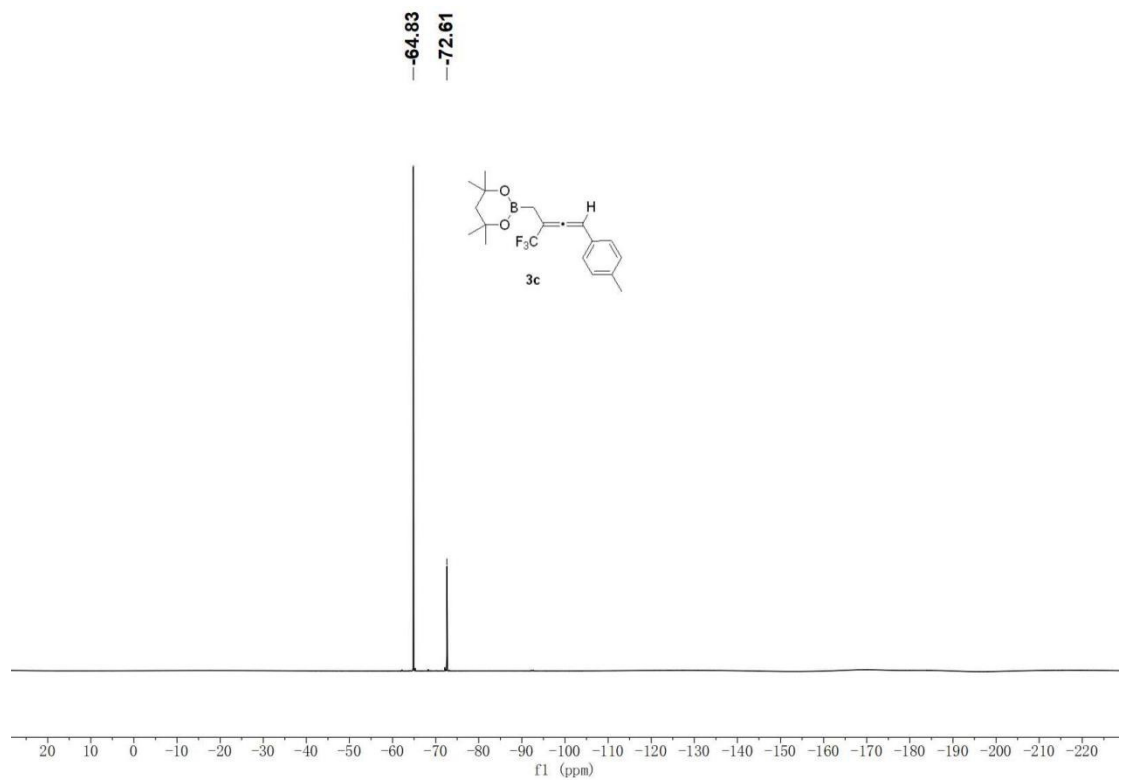

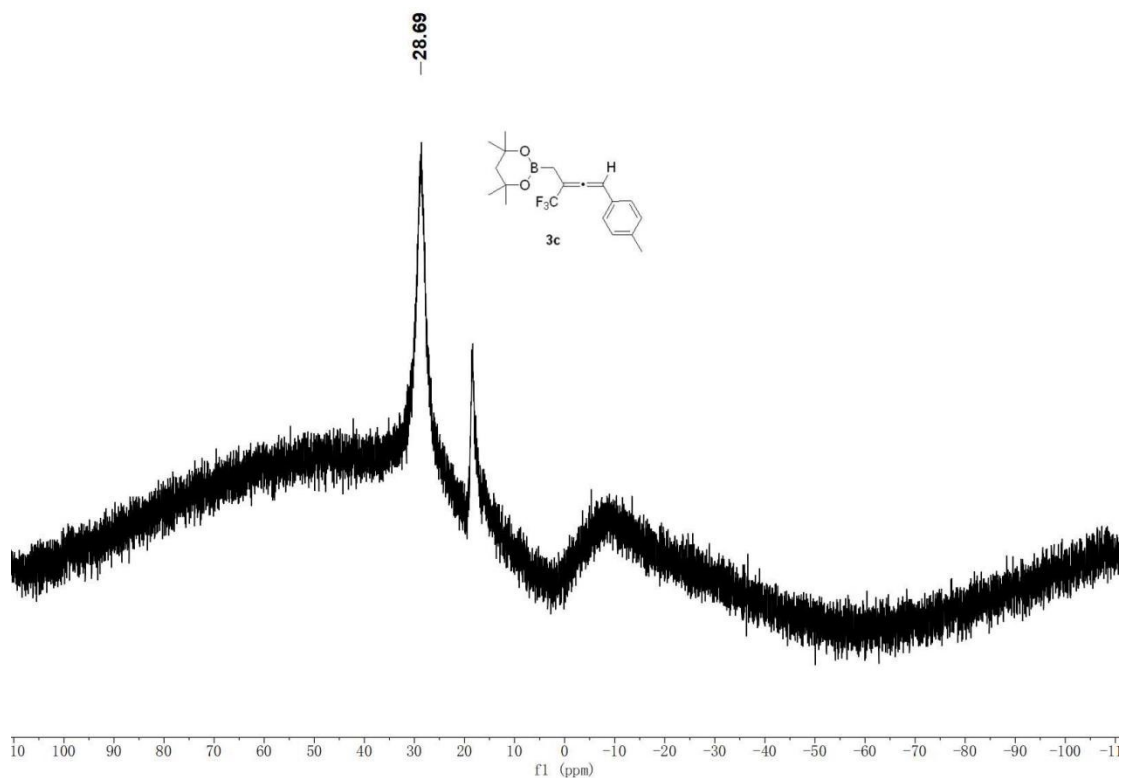

2-(4-(4-(*tert*-butyl)phenyl)-2-(trifluoromethyl)buta-2,3-dien-1-yl)-4,4,6,6-tetramethyl-1,3,2-dioxaborinane (**3d**)

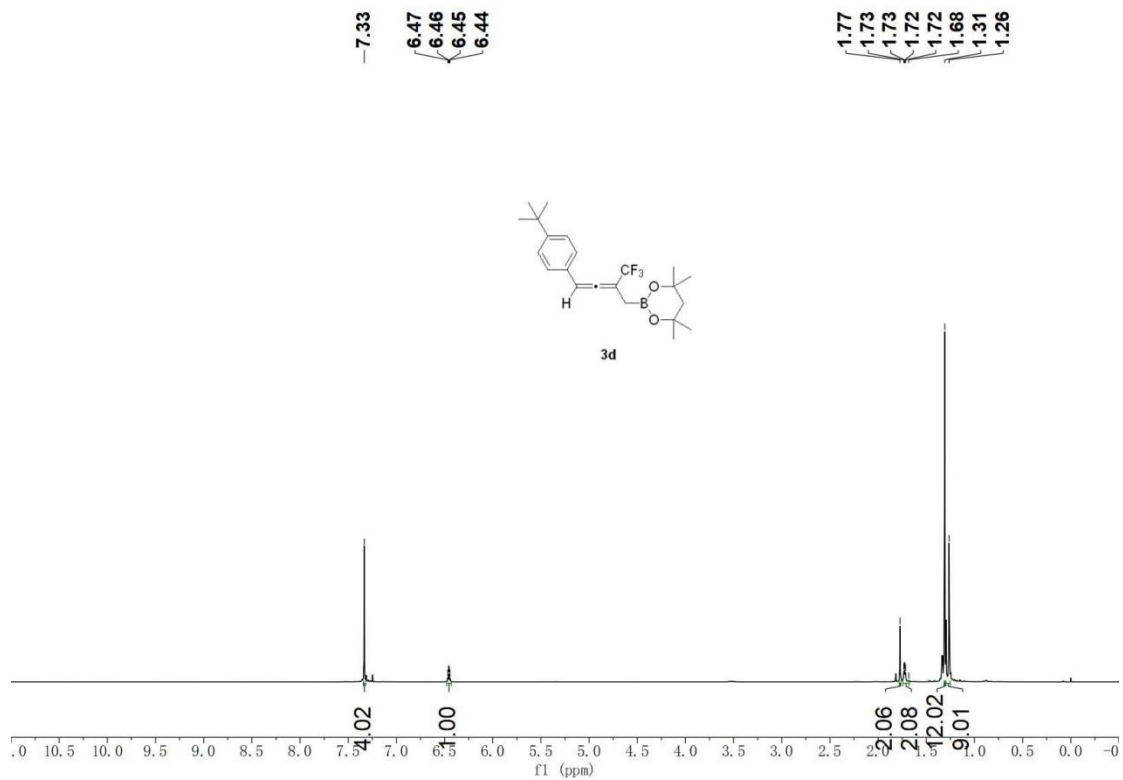

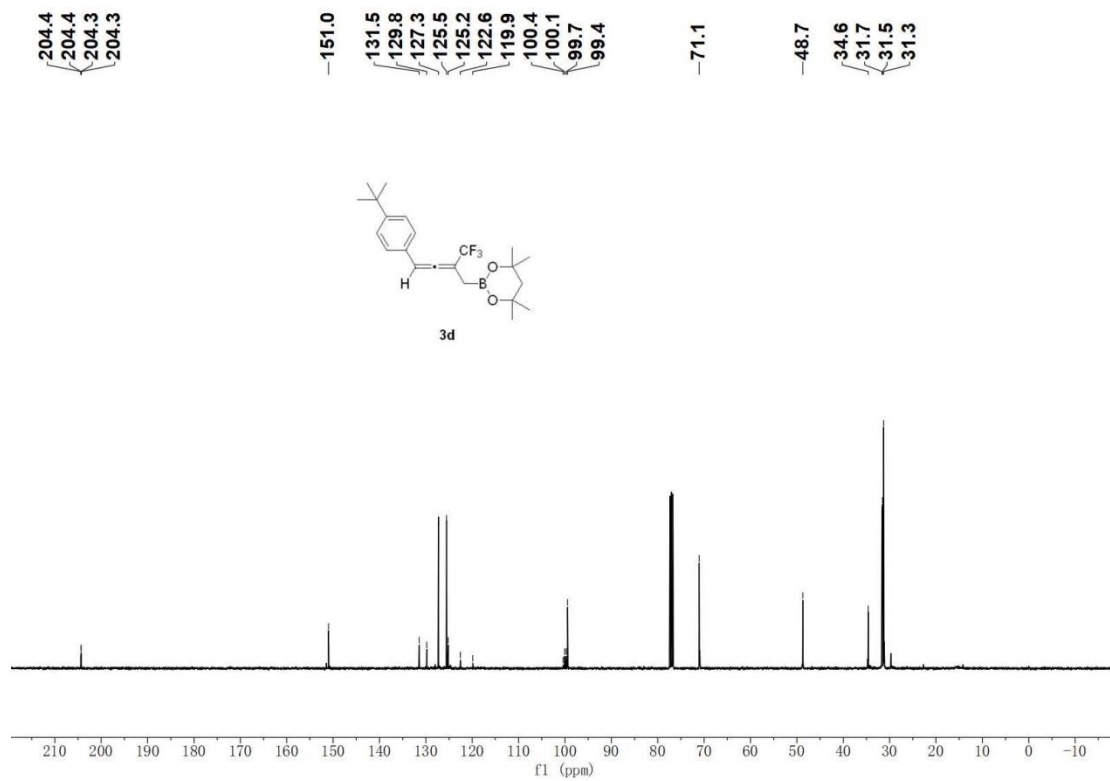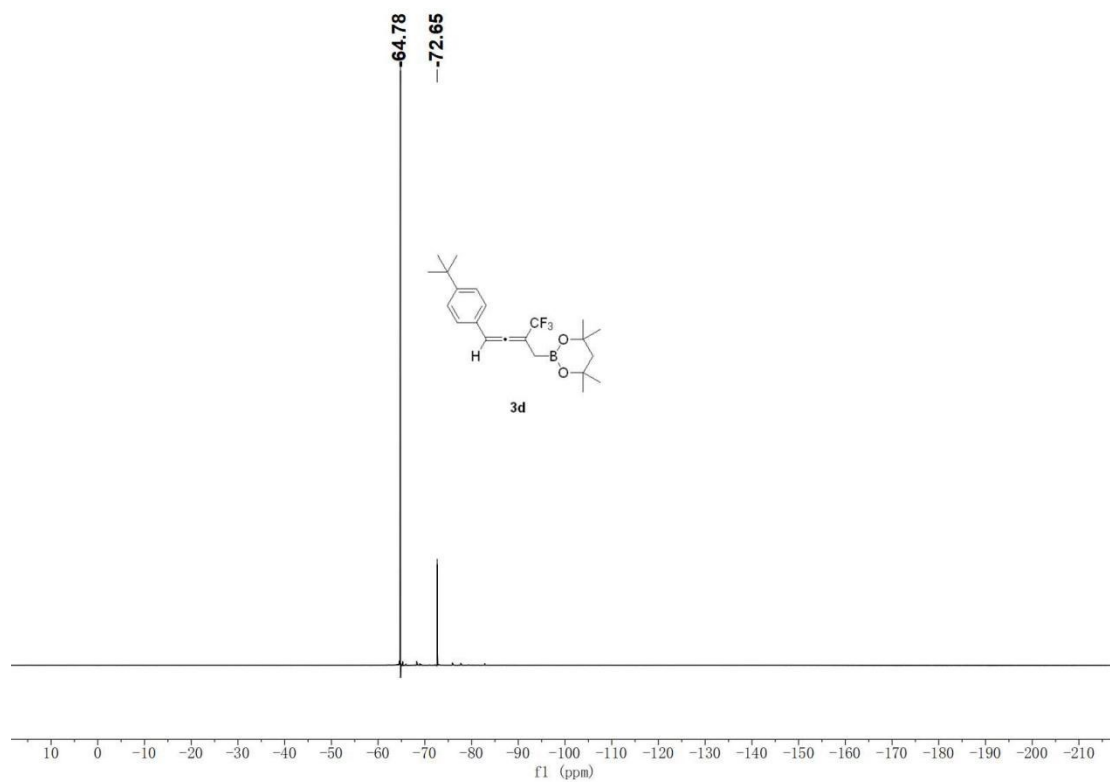

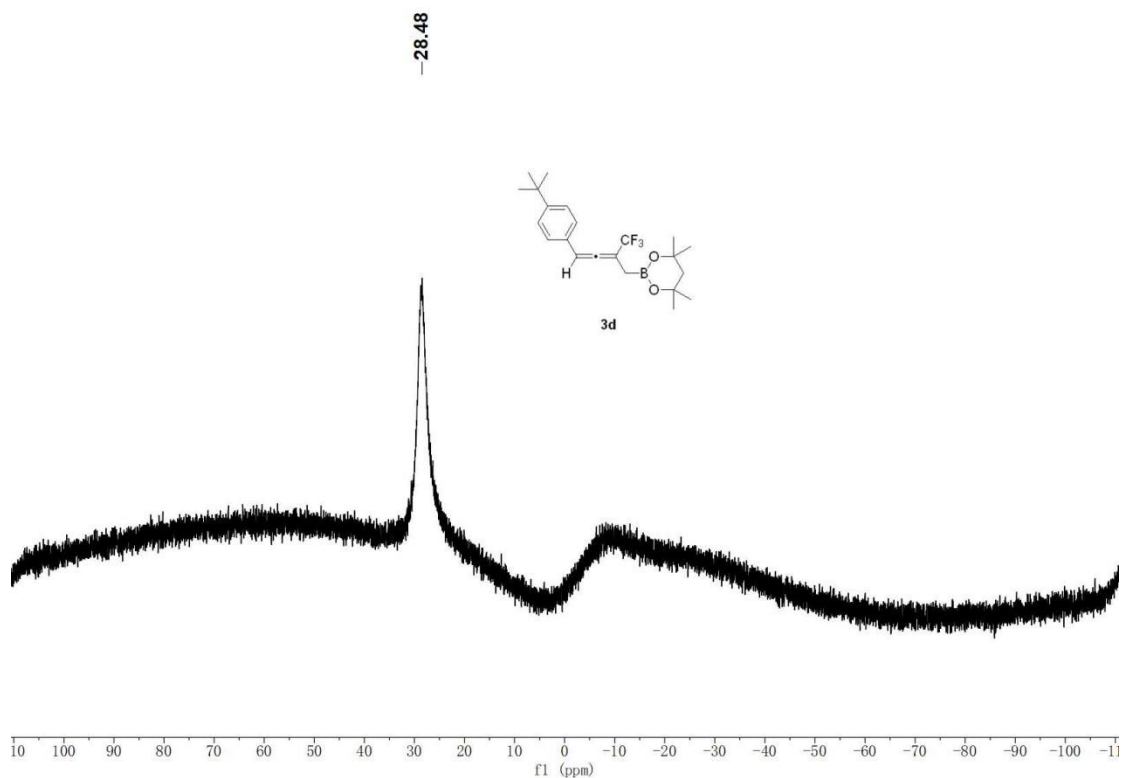

**2-(4-(4-chlorophenyl)-2-(trifluoromethyl)buta-2,3-dien-1-yl)-4,4,6,6-tetramethyl-1,3,2-dioxaborinane (3e)**

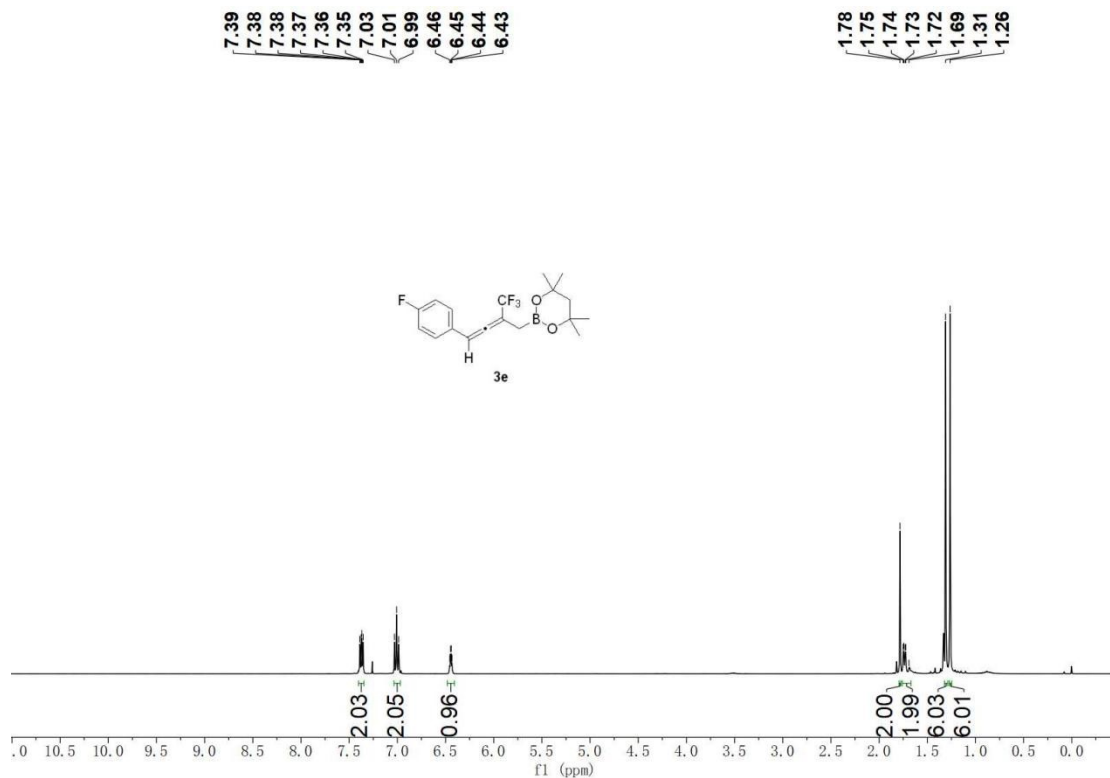

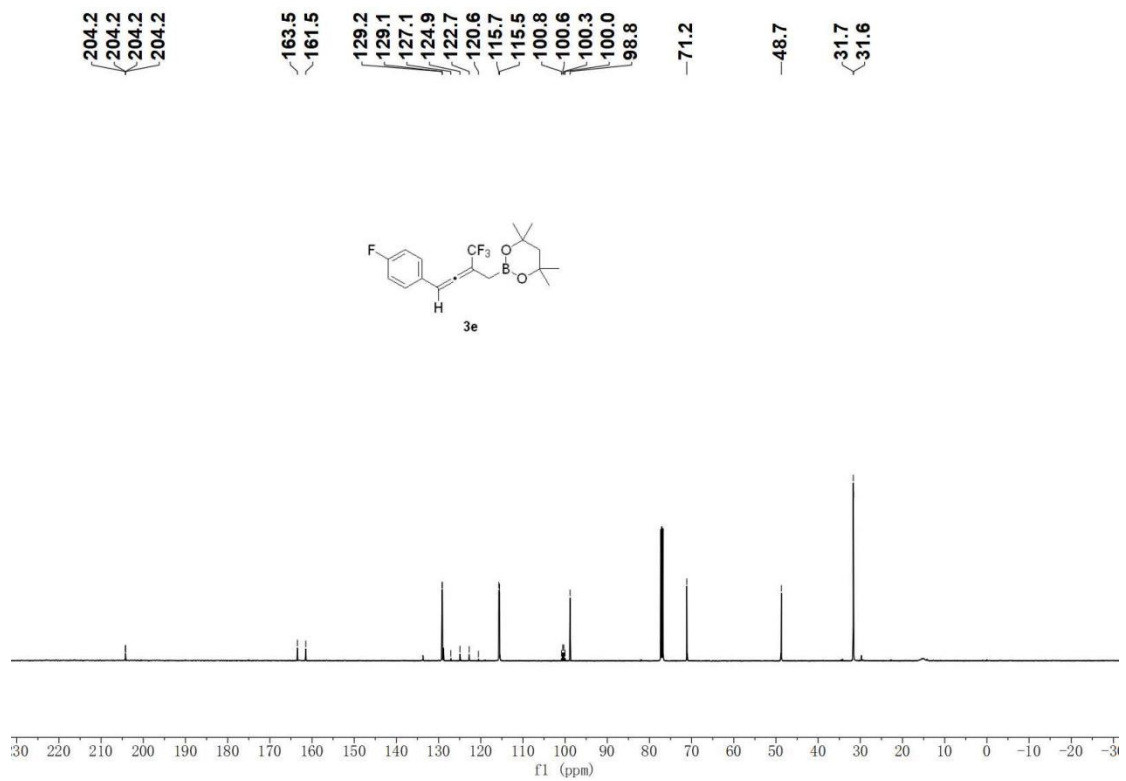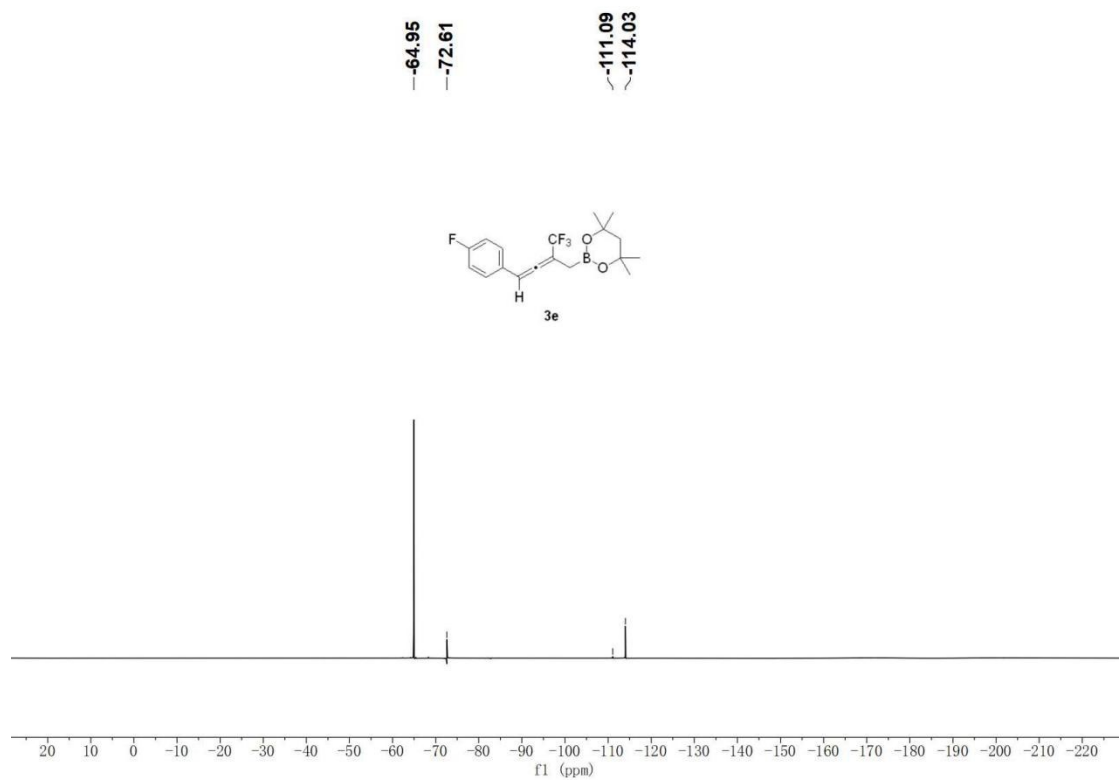

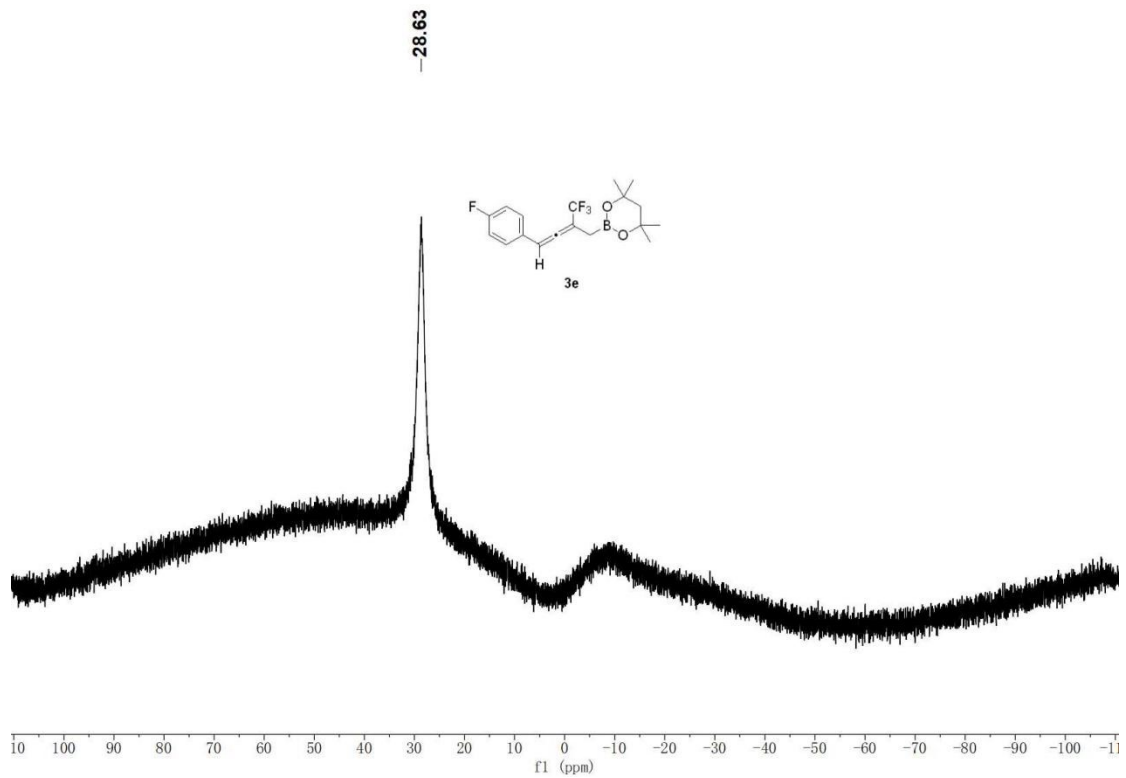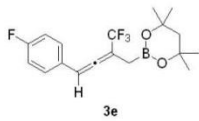

**2-(4-(4-chlorophenyl)-2-(trifluoromethyl)buta-2,3-dien-1-yl)-4,4,6,6-tetramethyl-1,3,2-dioxaborinane(3f)**

7.39  
7.38  
7.37  
7.37  
7.33  
7.33  
7.32  
7.31  
6.48  
6.47  
6.47  
6.46

1.83  
1.79  
1.79  
1.77  
1.76  
1.74  
1.73  
1.35  
1.31

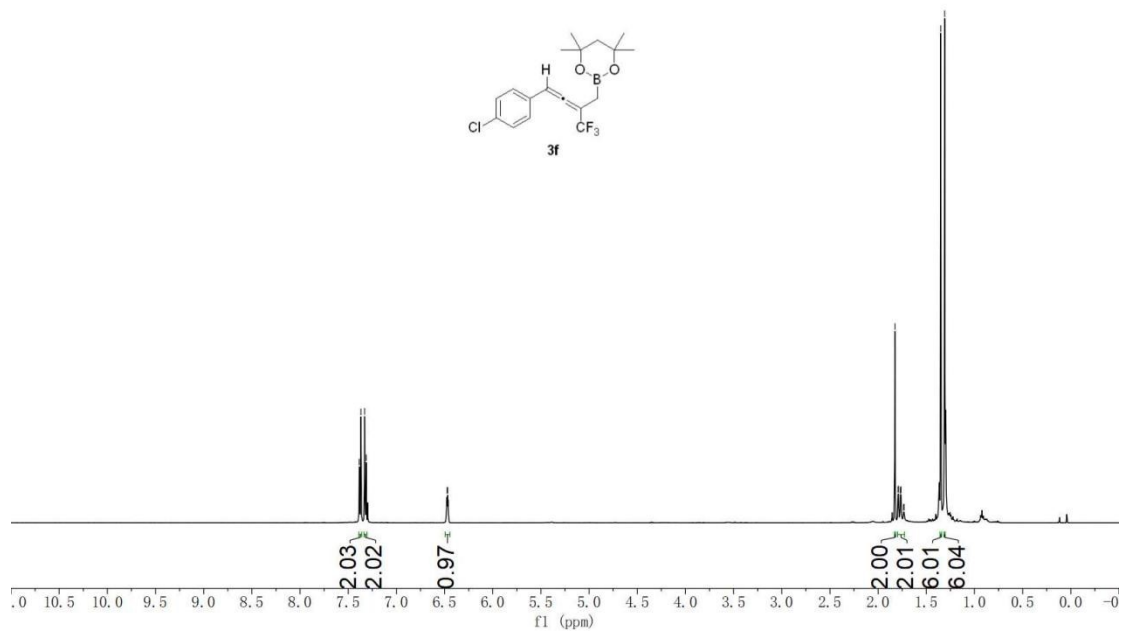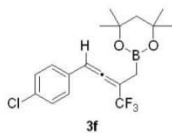

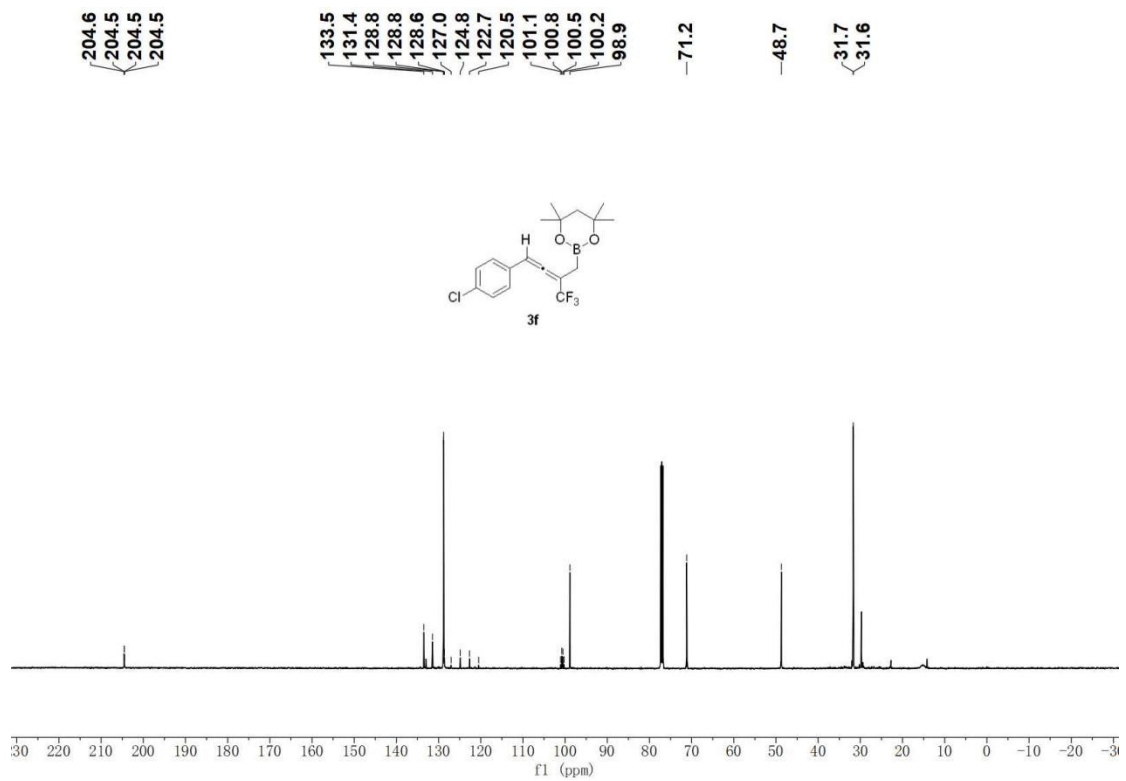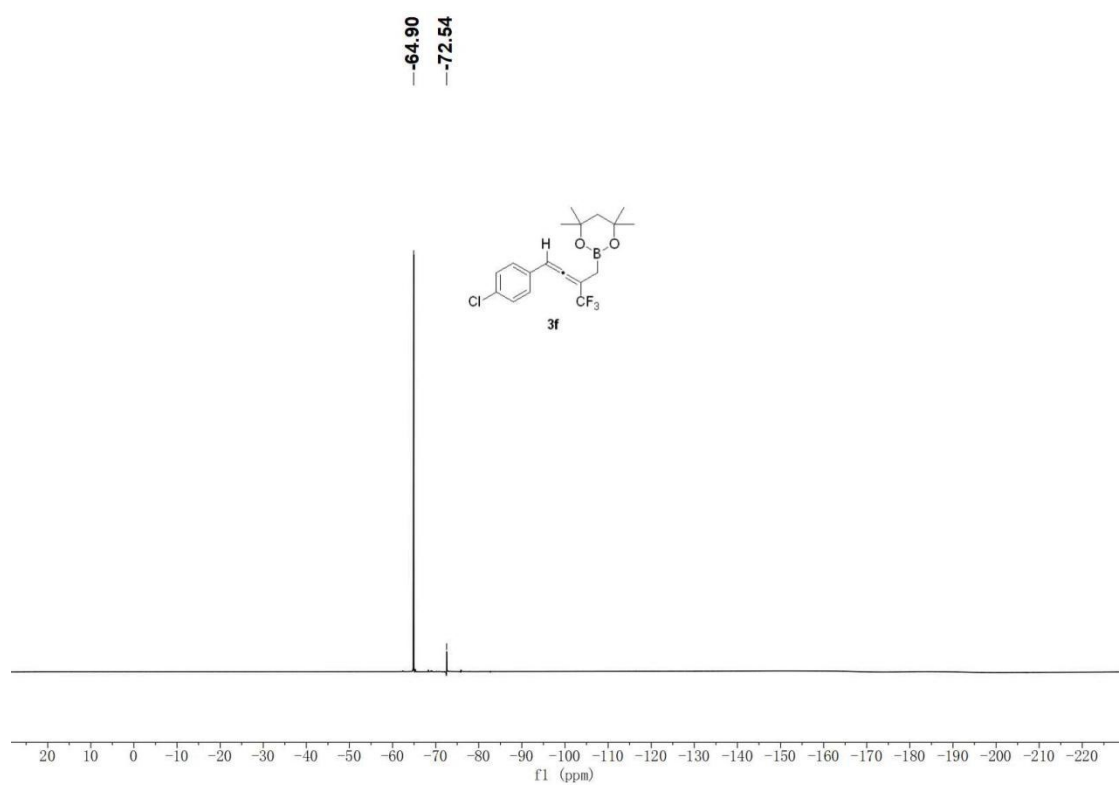



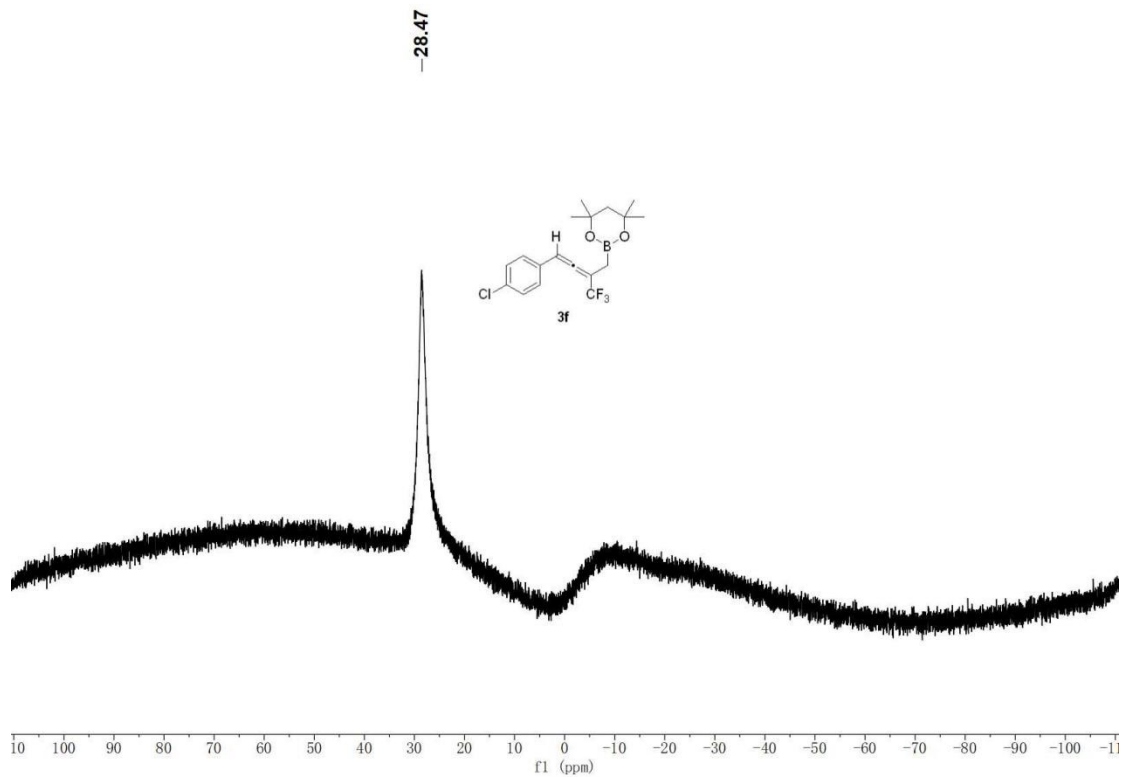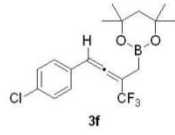

**2-(4-(3-chlorophenyl)-2-(trifluoromethyl)buta-2,3-dien-1-yl)-4,4,6,6-tetramethyl-1,3,2-dioxaborinane(3g)**

7.37  
7.26  
7.24  
7.23  
7.22  
6.43  
6.42  
6.41

1.79  
1.76  
1.75  
1.74  
1.73  
1.70  
1.69  
1.32  
1.27

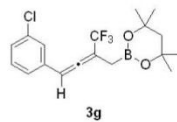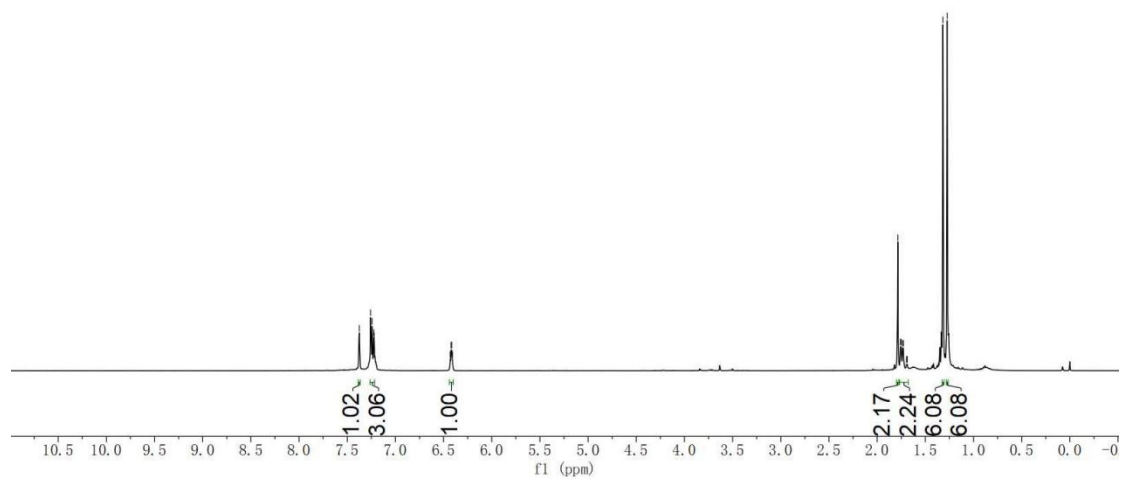

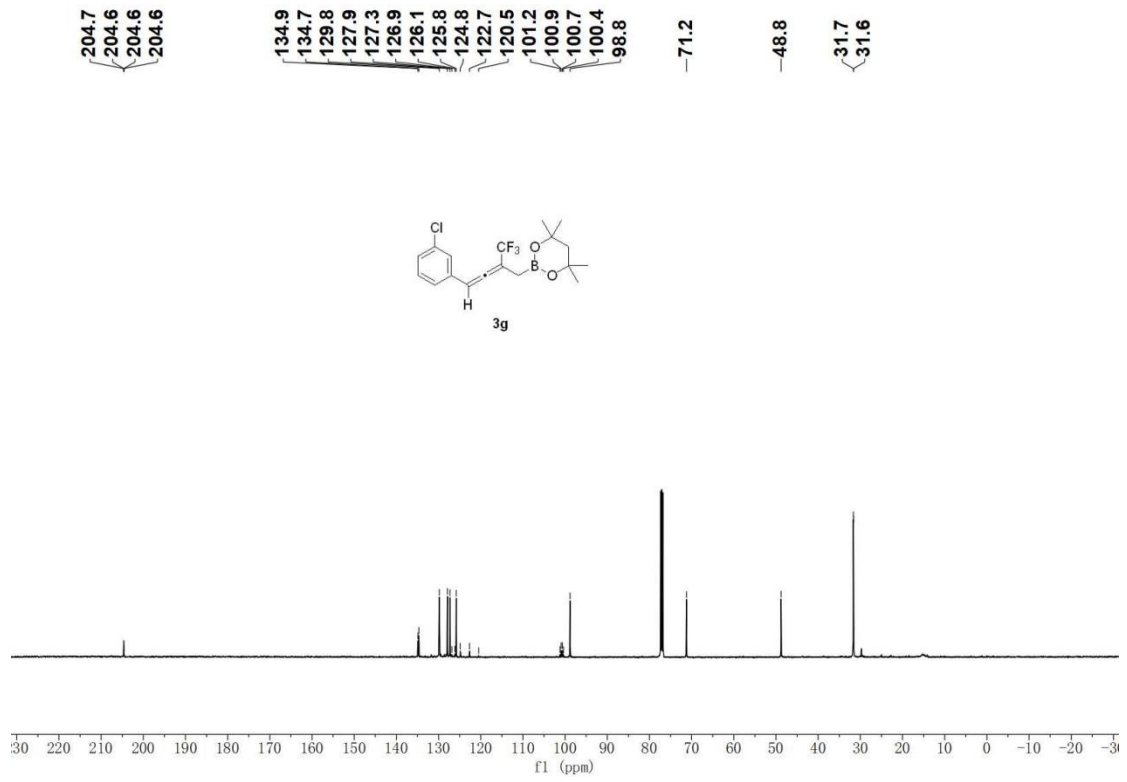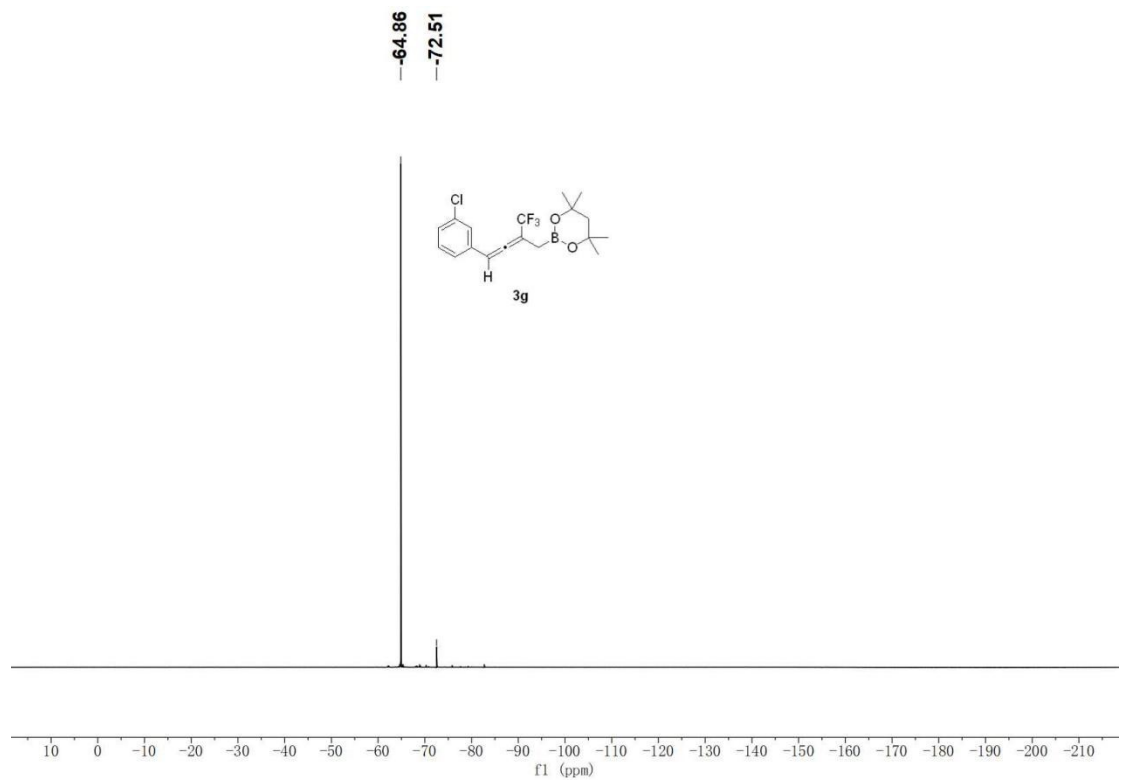

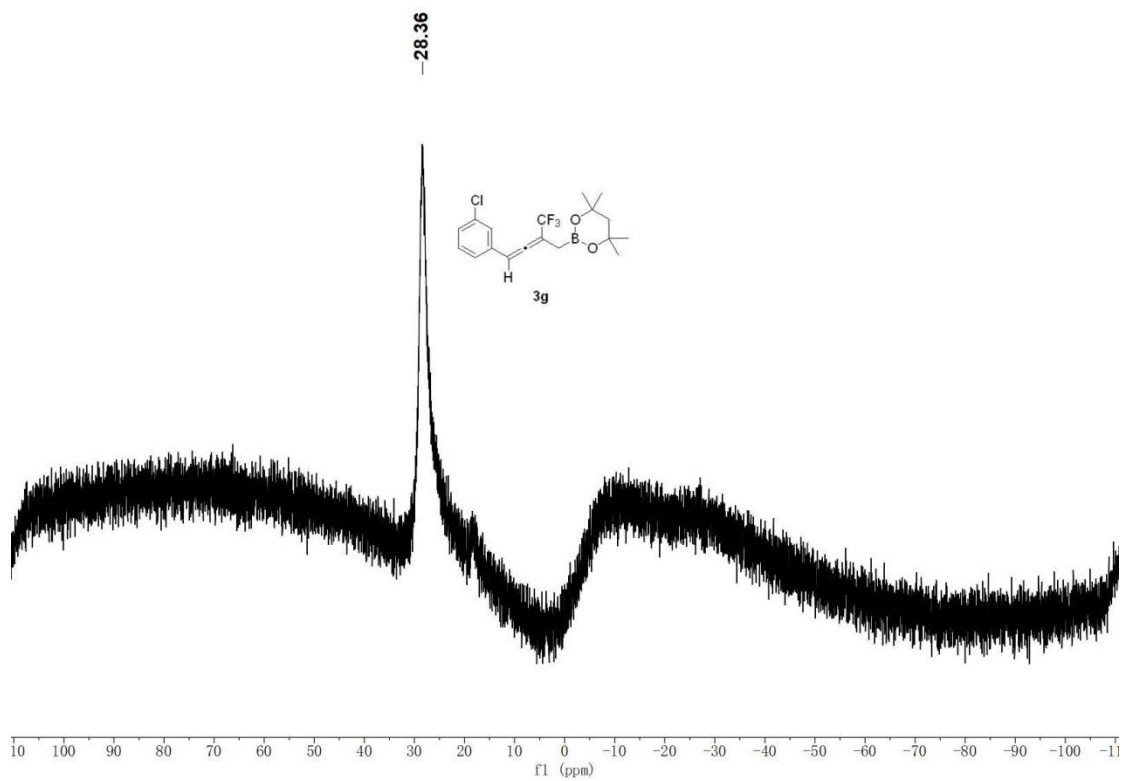

2-(4-(4-bromophenyl)-2-(trifluoromethyl)buta-2,3-dien-1-yl)-4,4,6,6-tetramethyl-1,3,2-dioxaborinane(3h)

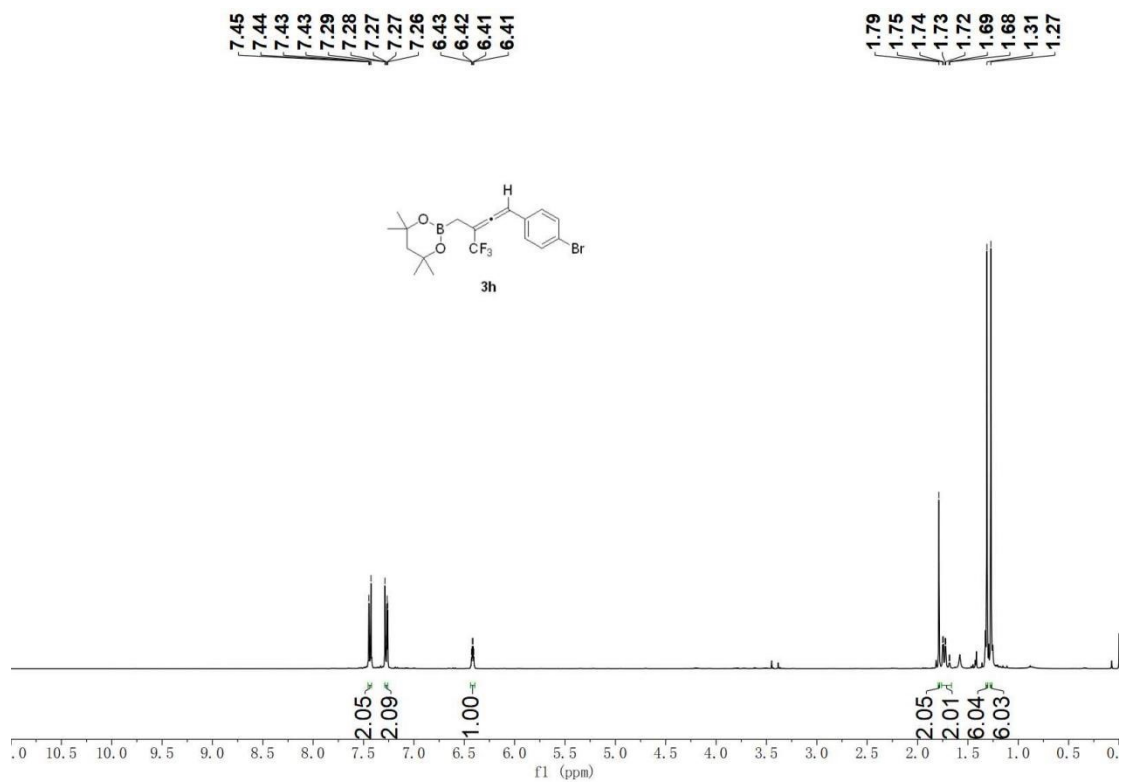

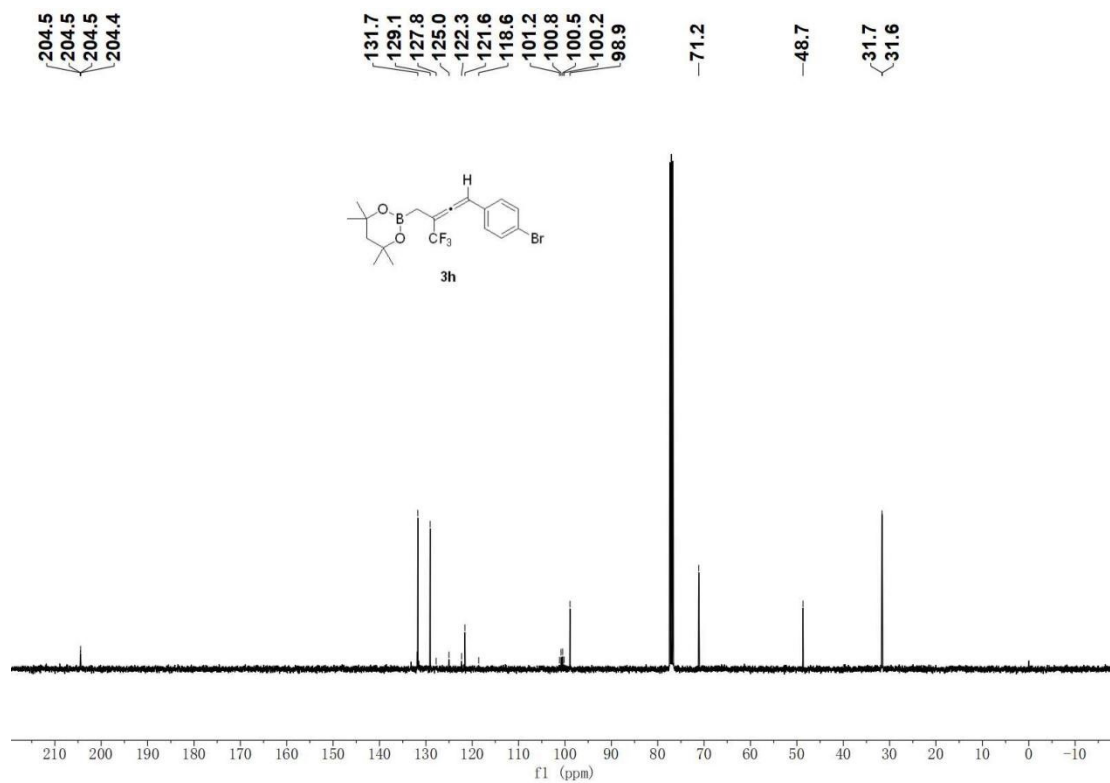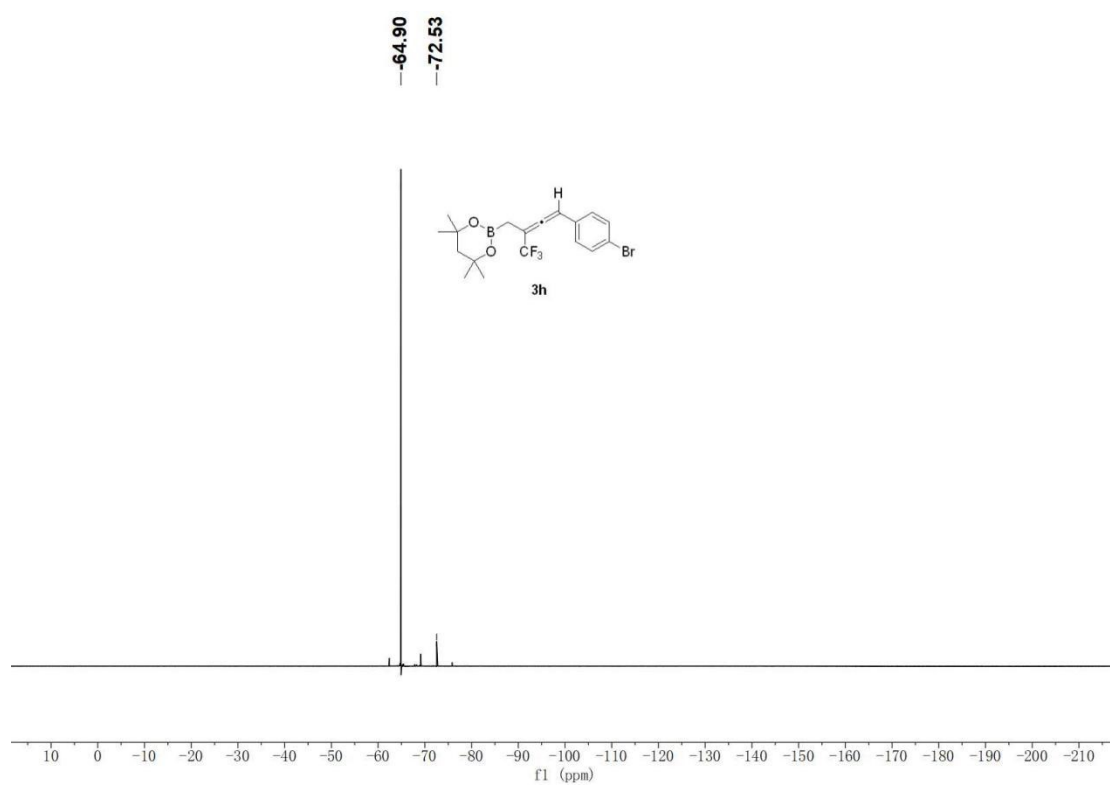

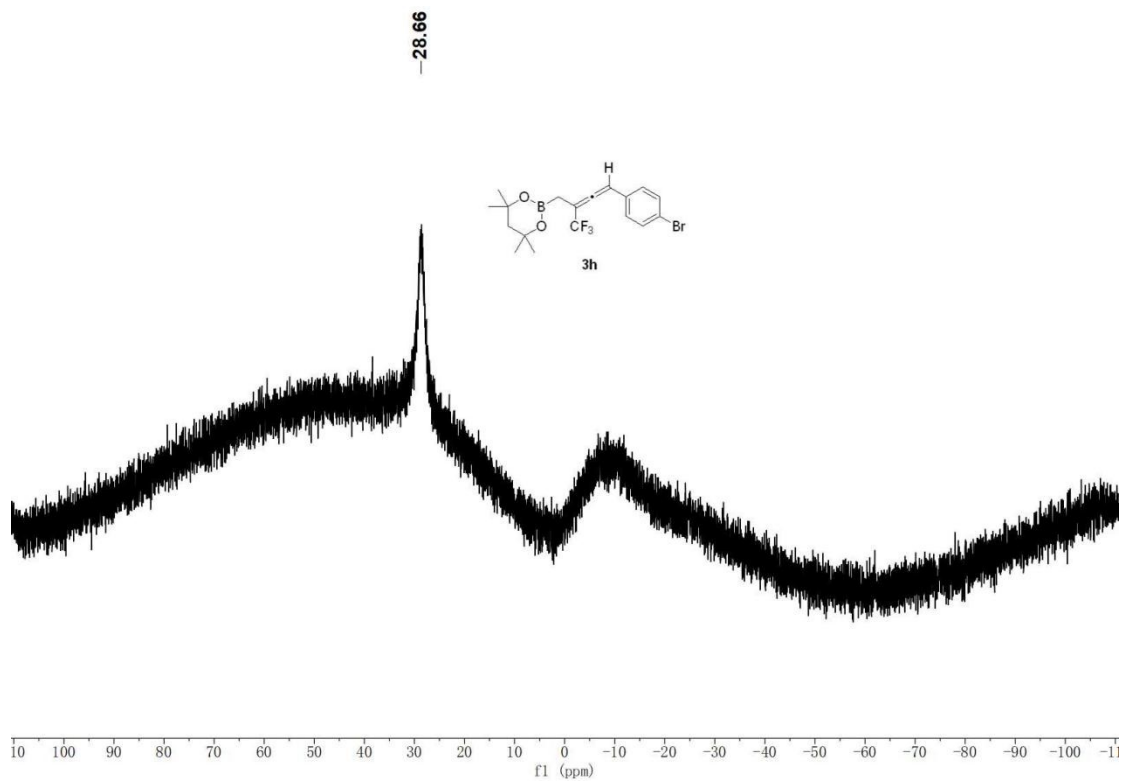

**4,4,6-trimethyl-2-(4-phenyl-2-(trifluoromethyl)buta-2,3-dien-1-yl)-1,3,2-dioxaborinane (3i)**

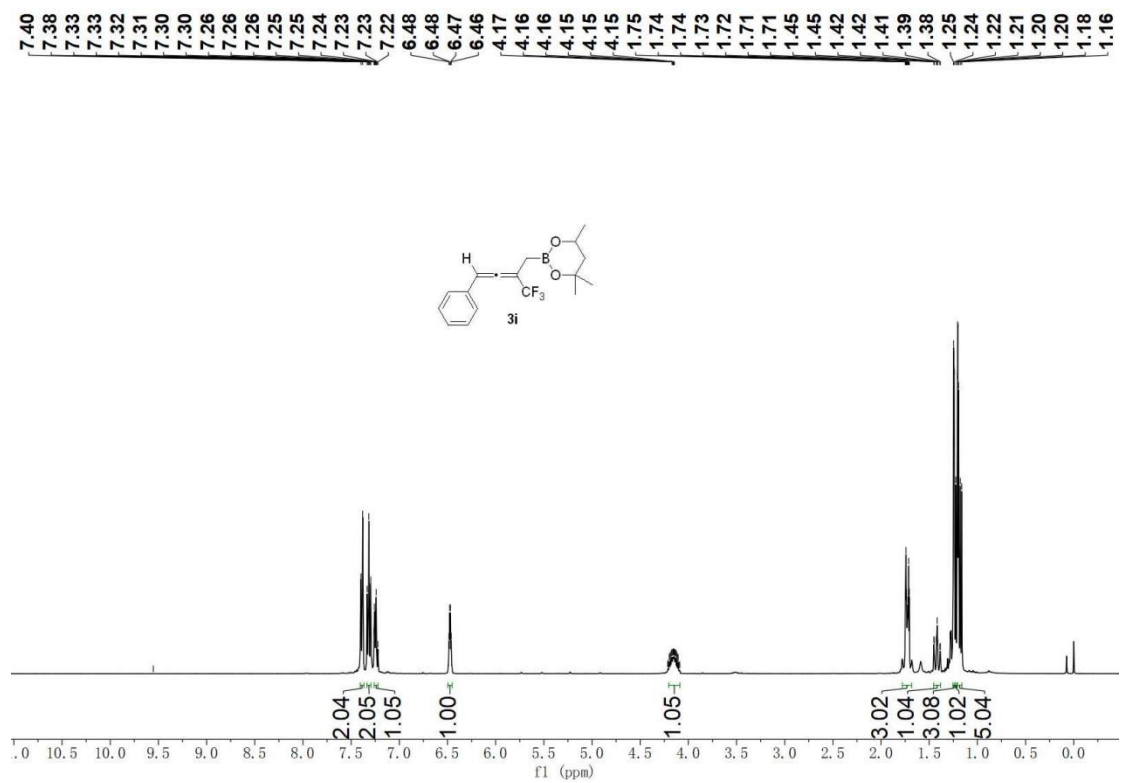

204.4  
204.4  
204.4

132.7  
128.6  
128.2  
127.8  
127.6  
127.5  
125.2  
122.5  
119.7  
100.6  
100.2  
99.9  
99.8  
99.5

71.3  
65.1  
65.1

45.8  
45.7  
31.0  
31.0  
28.0  
27.9  
23.0  
22.9

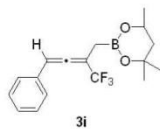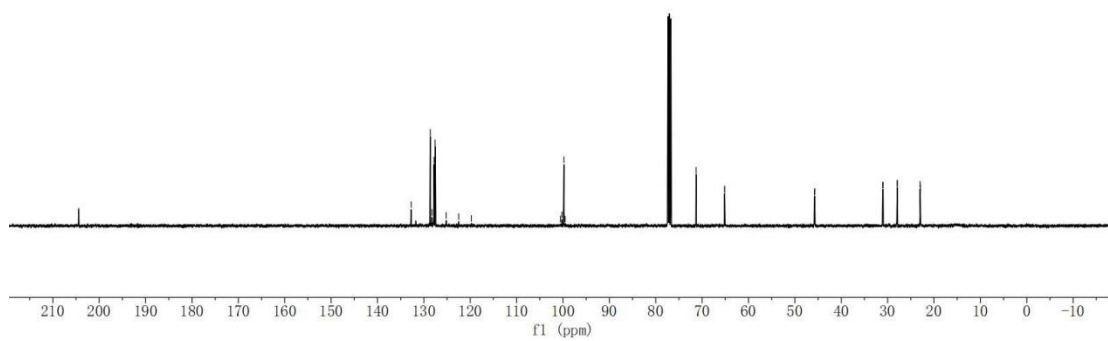

-64.93  
-72.62

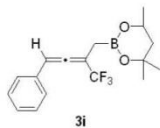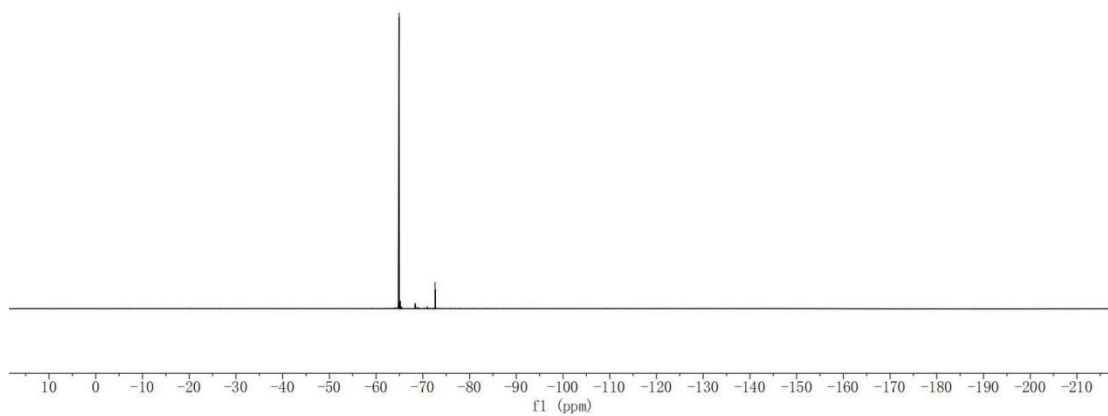

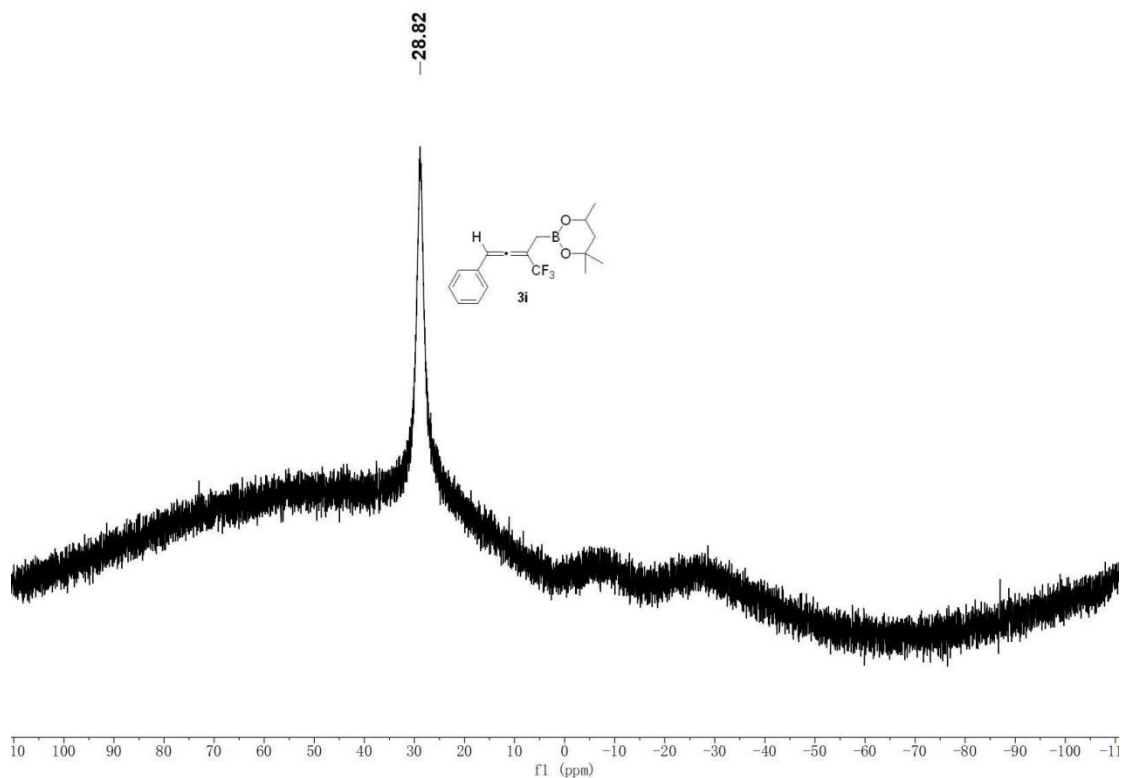

**4,4,5,5-tetramethyl-2-(4-phenyl-2-(trifluoromethyl)buta-2,3-dien-1-yl)-1,3,2-dioxaborolane (3j)**

7.31  
7.31  
7.30  
7.29  
7.27  
7.27  
7.26  
7.25  
7.24  
7.23  
7.20  
7.20  
7.19  
7.18  
7.18  
7.17  
6.47  
6.46  
6.45  
6.44

1.83  
1.79  
1.78  
1.78  
1.77  
1.74  
1.14  
1.11

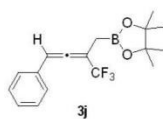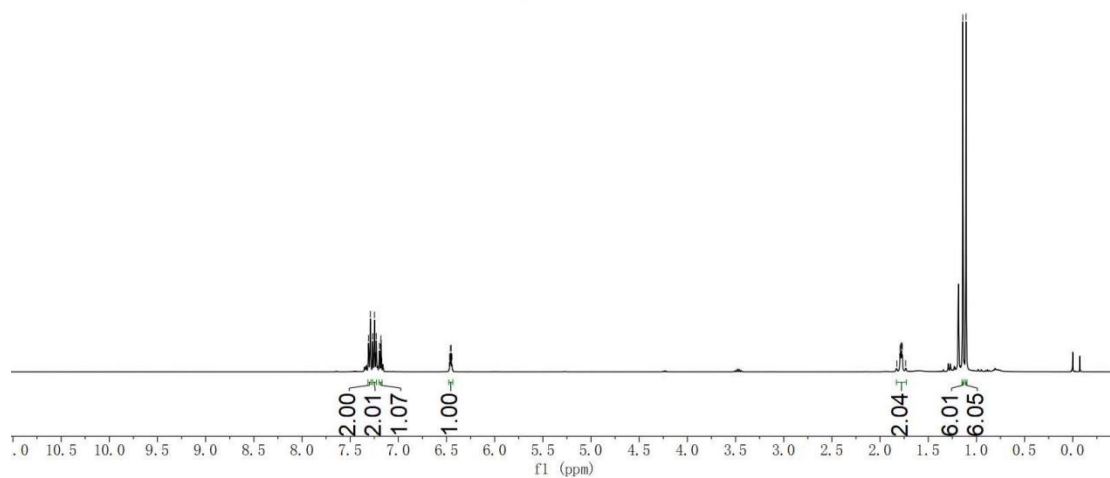

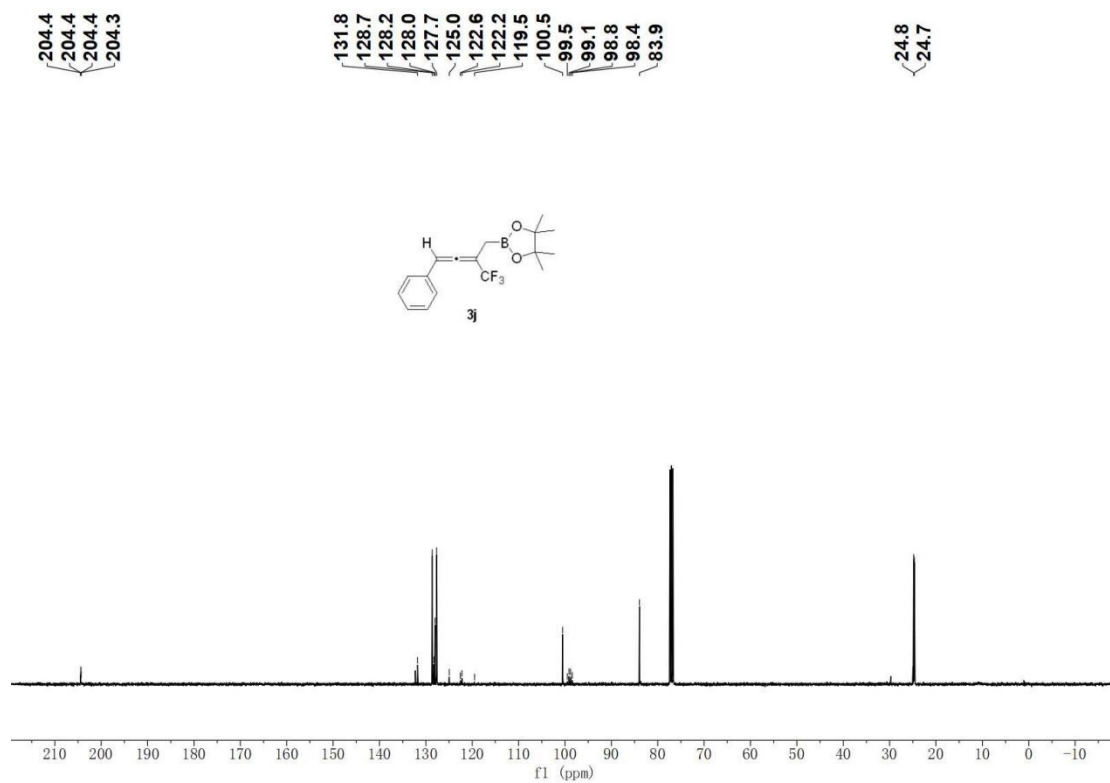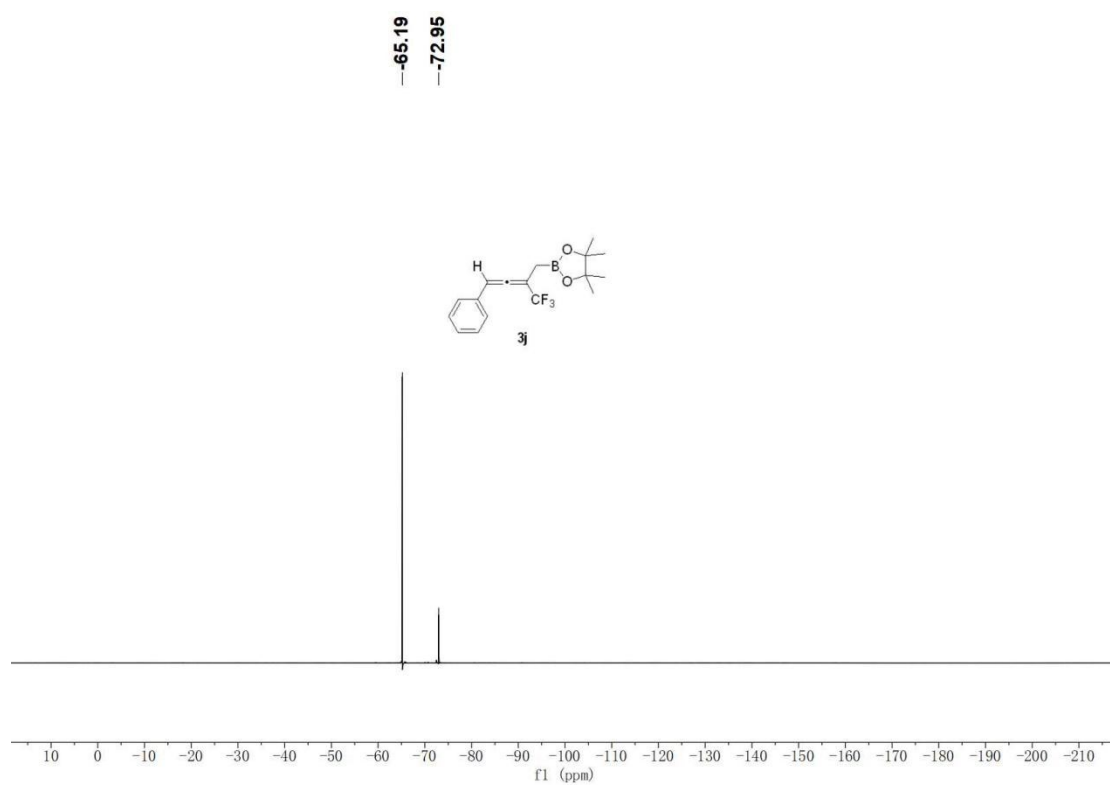



-32.07

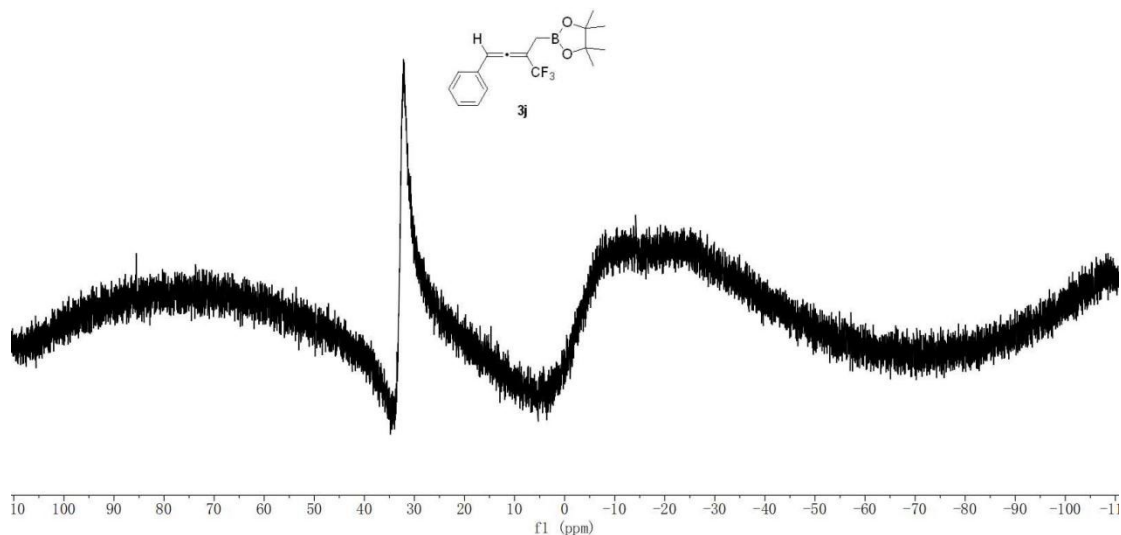

1,4-bis(4,4,4-trifluoro-3-((4,4,6,6-tetramethyl-1,3,2-dioxaborinan-2-yl)methyl)buta-1,2-dien-1-yl)benzene(3k)

7.34 7.33 6.47 6.46 6.45 1.78 1.77 1.74 1.74 1.73 1.72 1.69 1.68 1.31 1.30 1.26 1.26

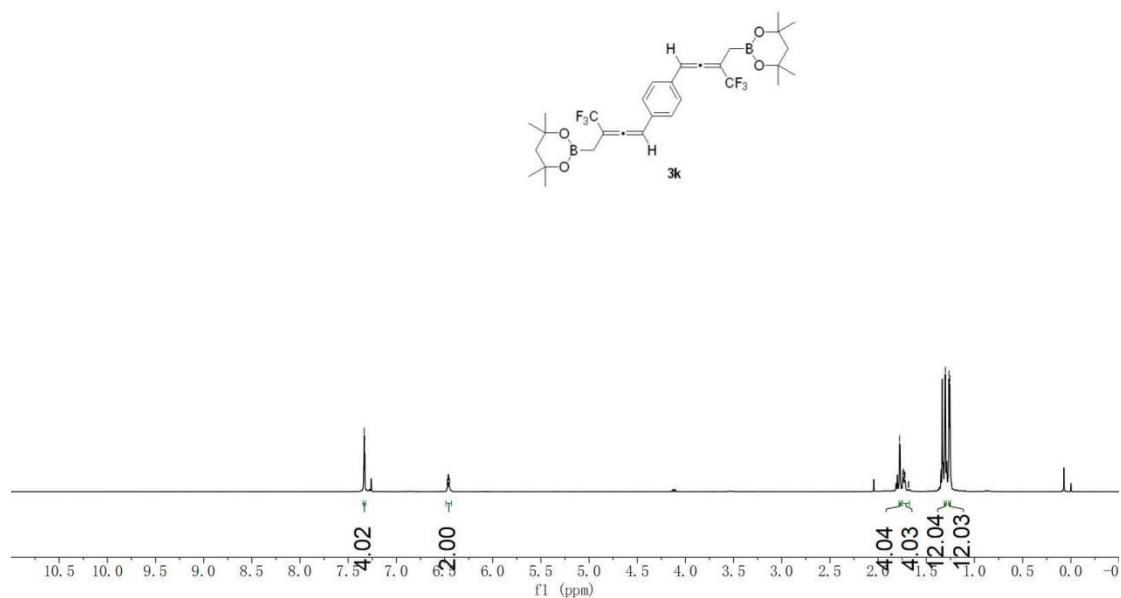

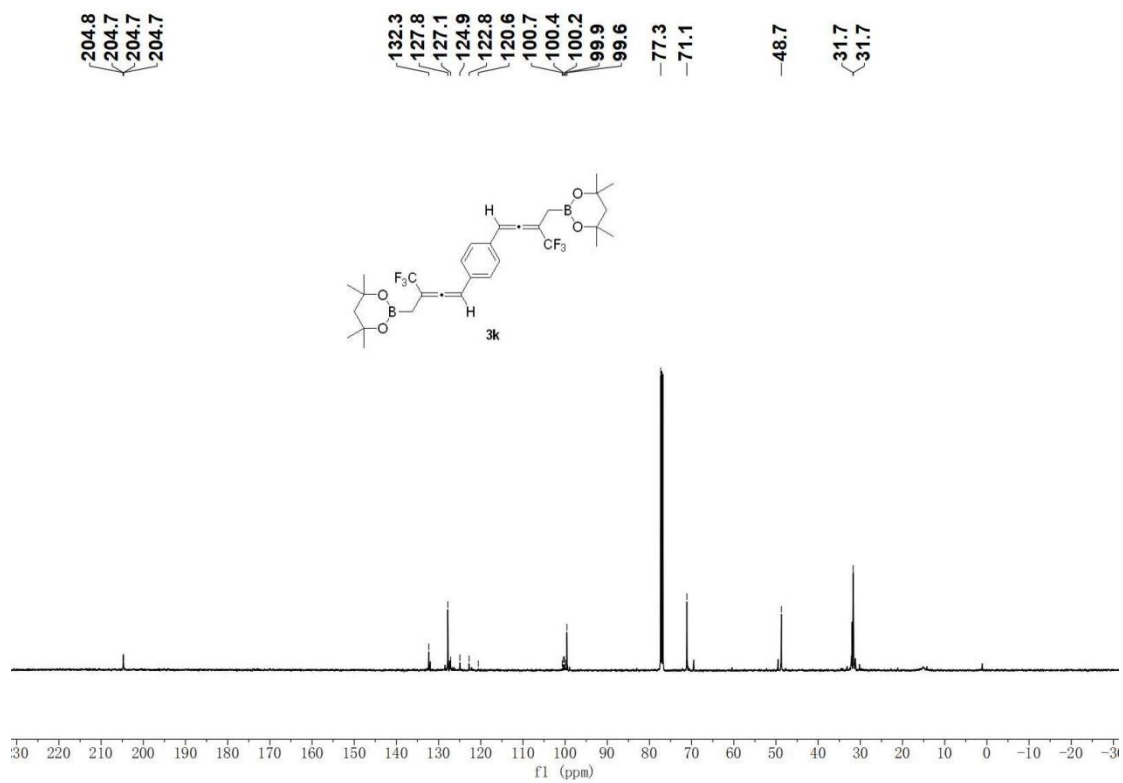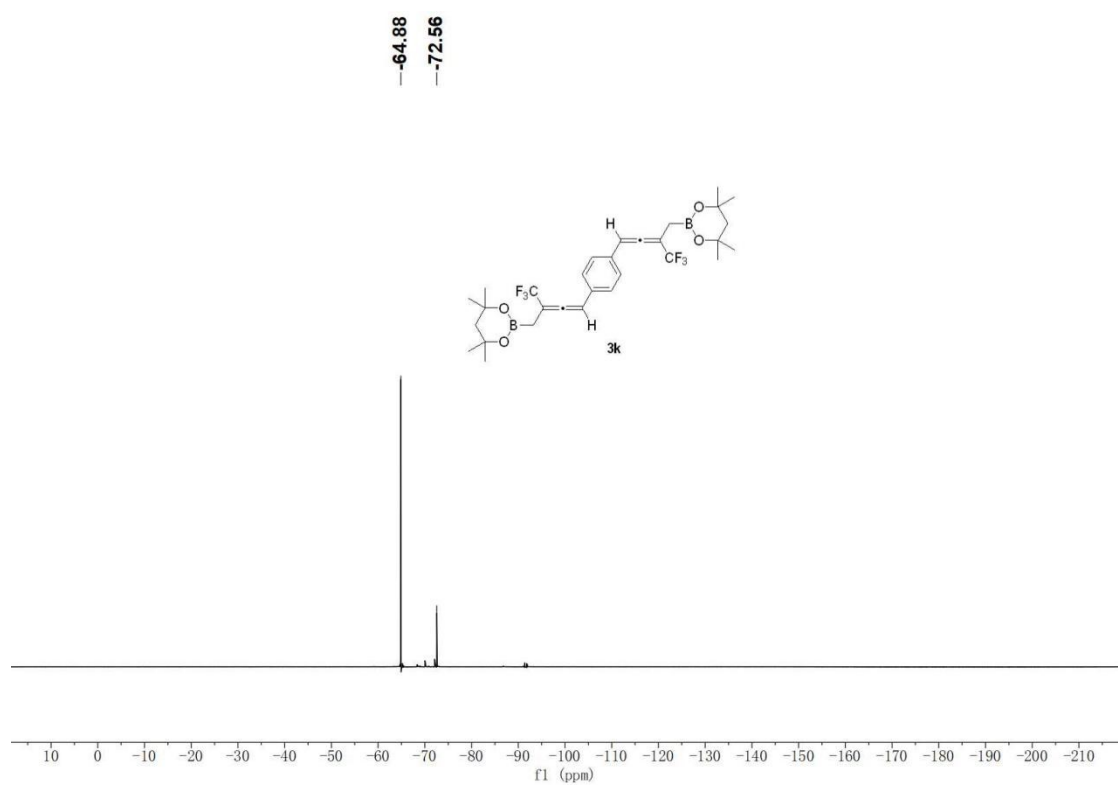

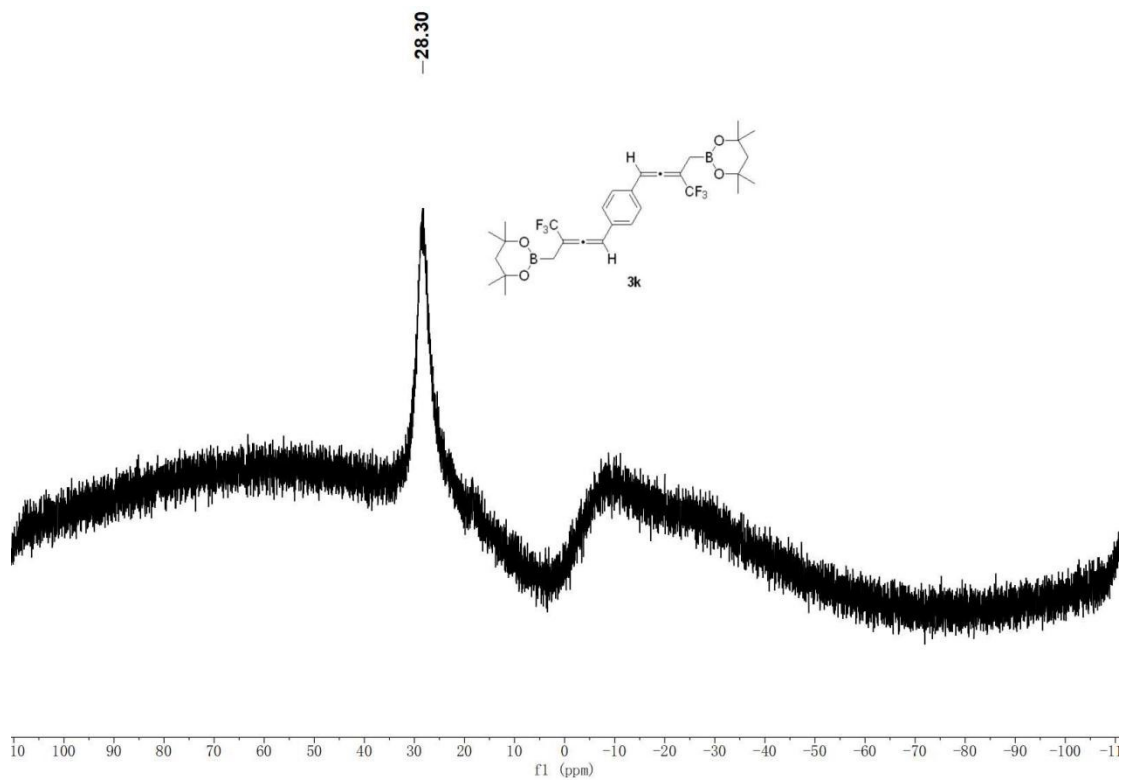

**6,6,6-trifluoro-5-((4,4,6,6-tetramethyl-1,3,2-dioxaborinan-2-yl)methyl)hexa-3,4-dien-1-yl 4-(3-(trifluoromethyl)but-3-en-1-yn-1-yl)benzoate(3l)**

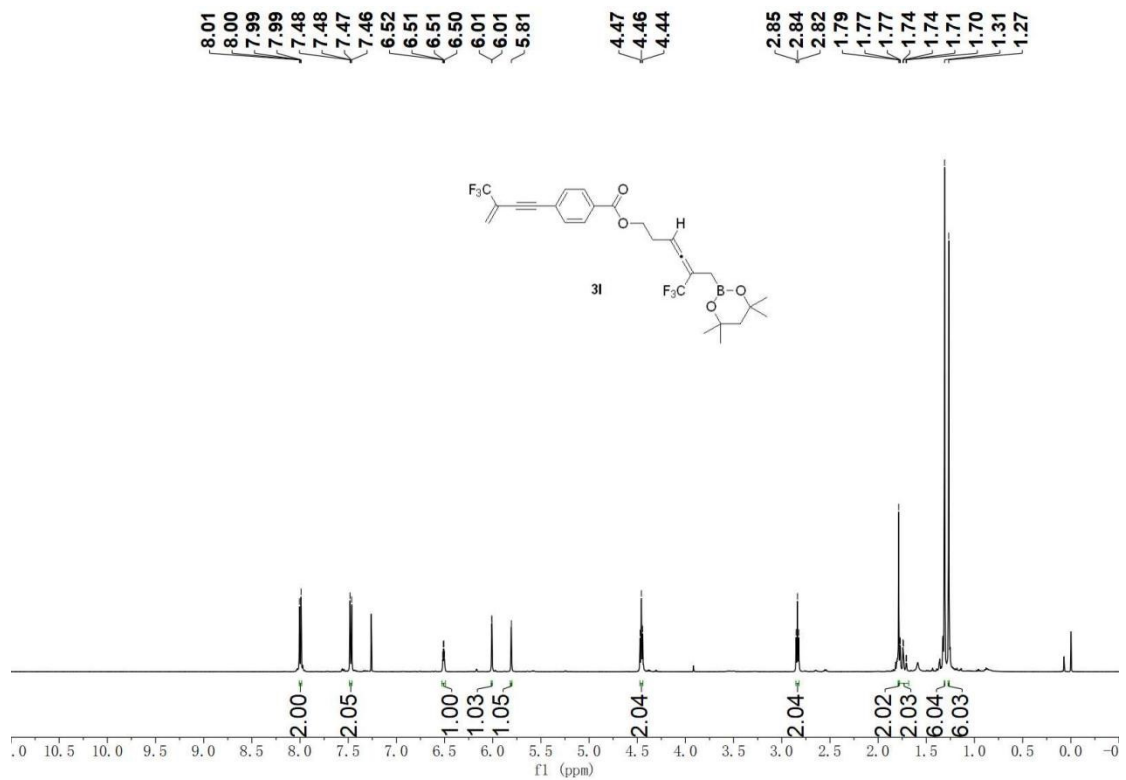

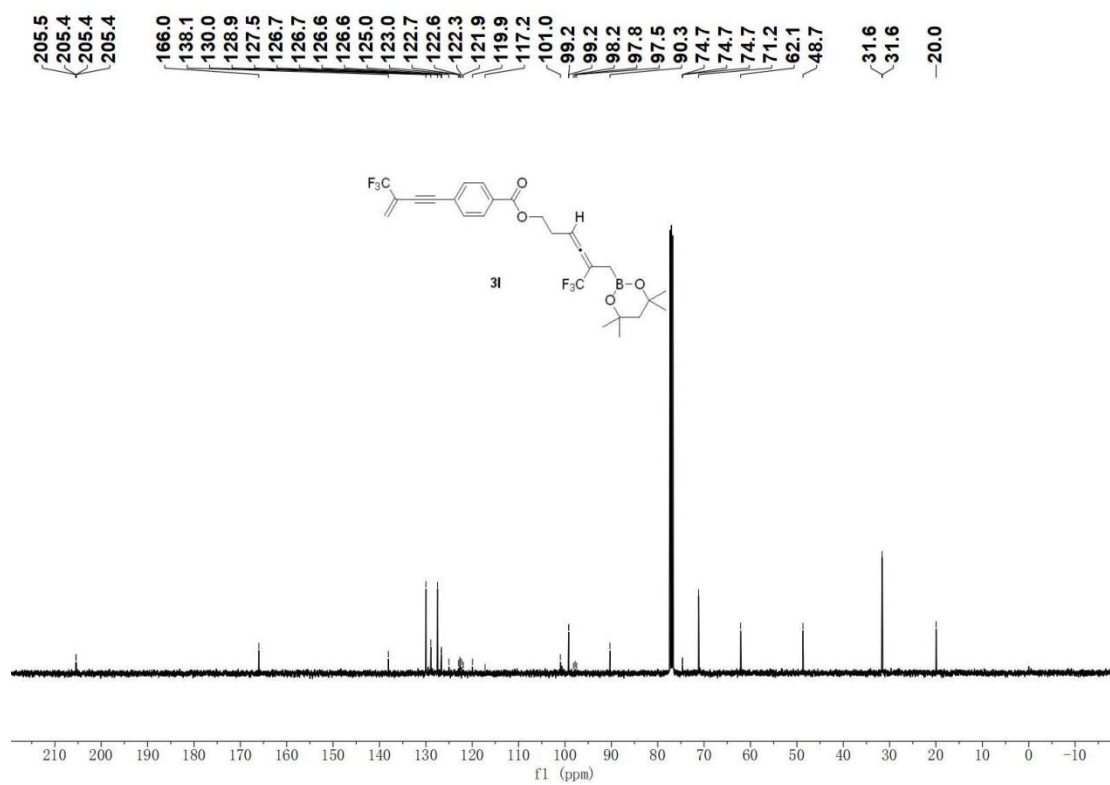

-64.83  
-68.30  
-72.45  
-72.96

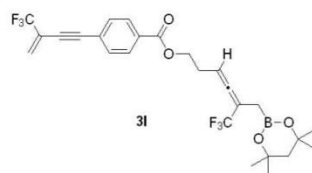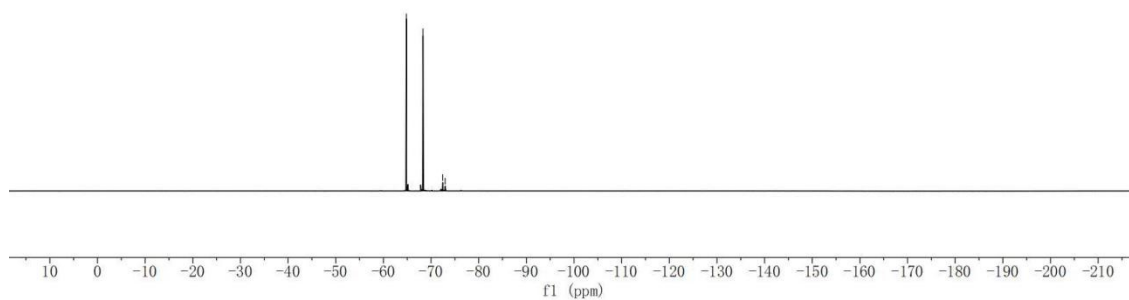

-28.48

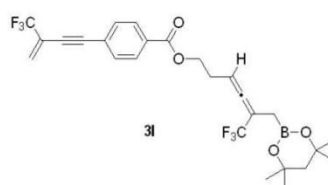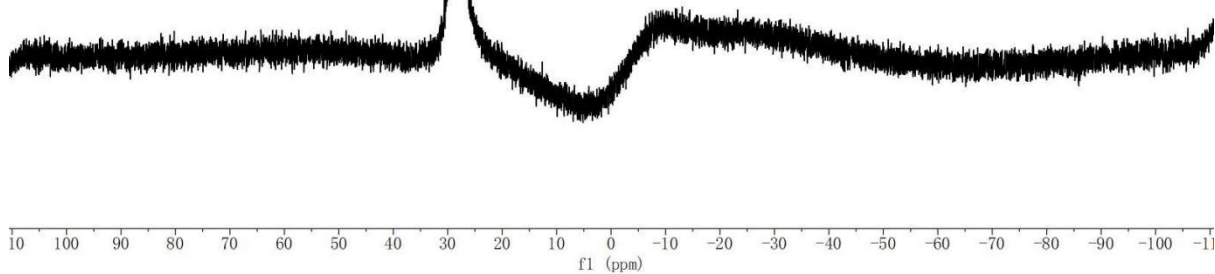

4,4,6,6-tetramethyl-2-(6-phenyl-2-(trifluoromethyl)hexa-2,3-dien-1-yl)-1,3,2-dioxaborinane(3m)

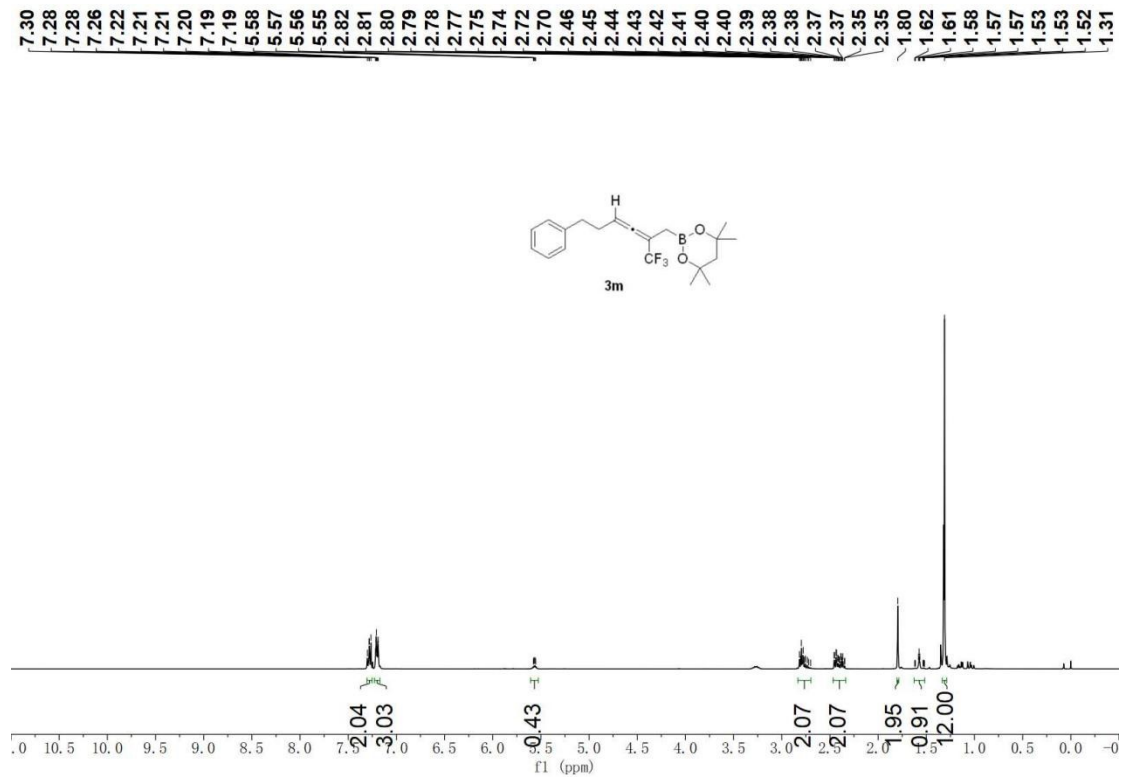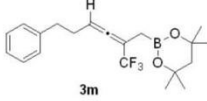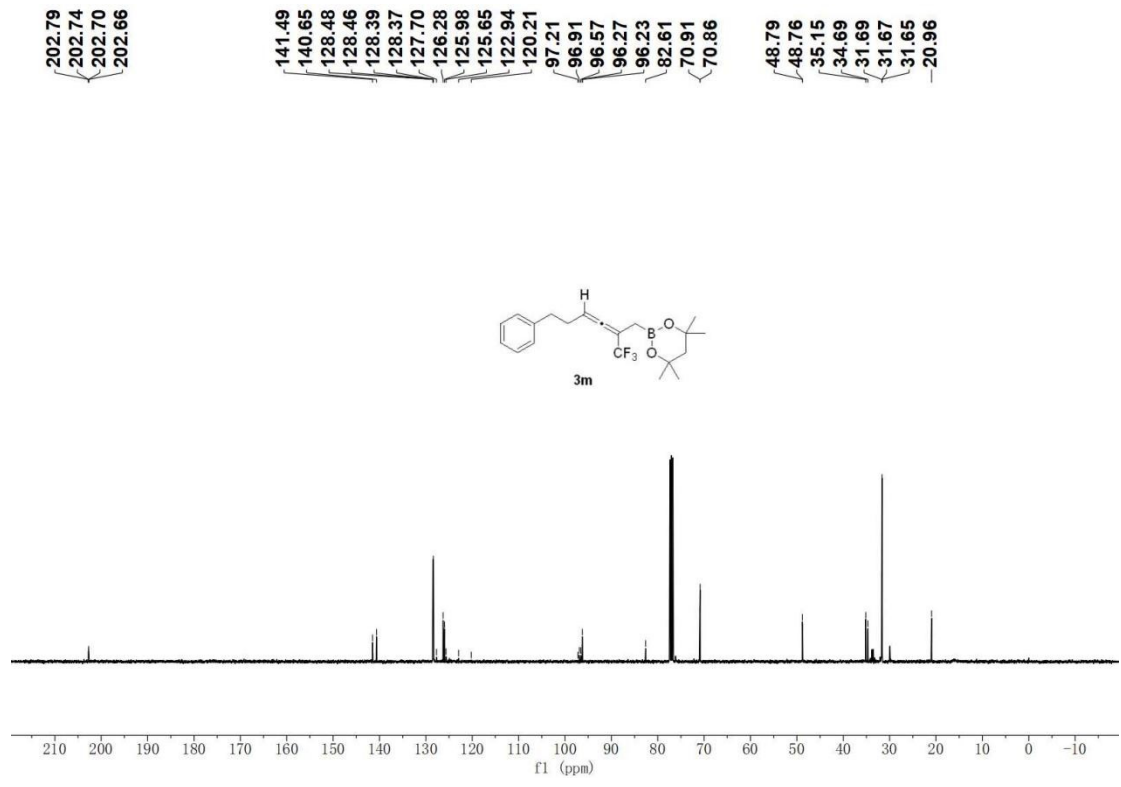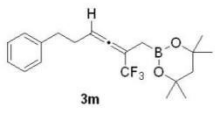



7.47  
7.47  
7.46  
7.45  
7.31  
7.30  
7.29  
7.29  
7.28  
7.27  
7.27  
7.26  
7.24  
7.15  
7.14  
7.12  
6.37  
6.36  
6.35  
6.34

1.87  
1.84  
1.83  
1.82  
1.79  
0.34  
0.33

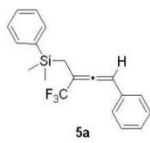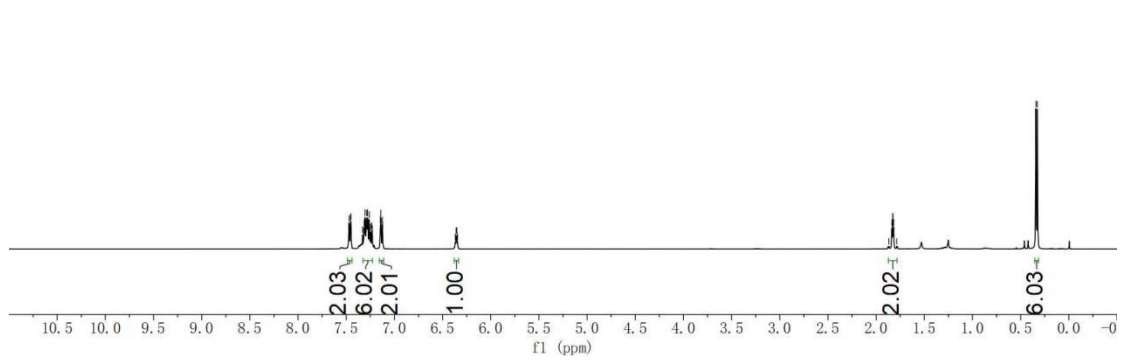

204.6  
204.6  
204.5  
204.5

137.6  
133.6  
132.1  
129.3  
128.8  
128.0  
127.8  
127.4  
125.1  
122.3  
101.0  
100.2  
99.8  
99.5

-14.5

-2.9

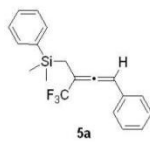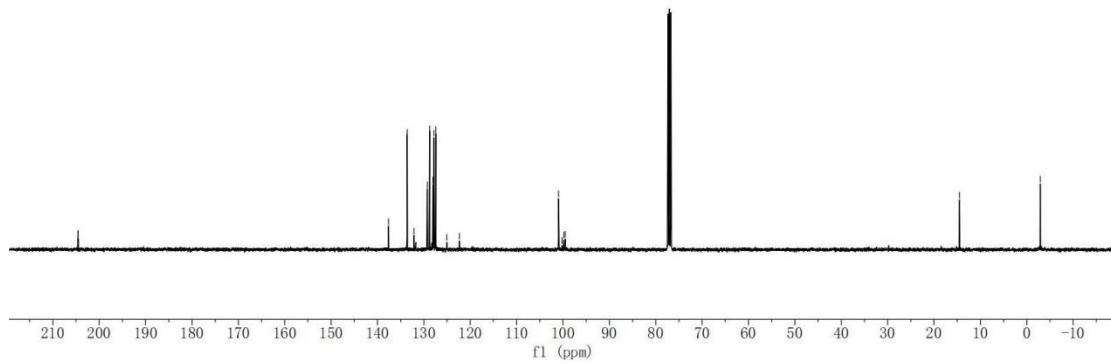



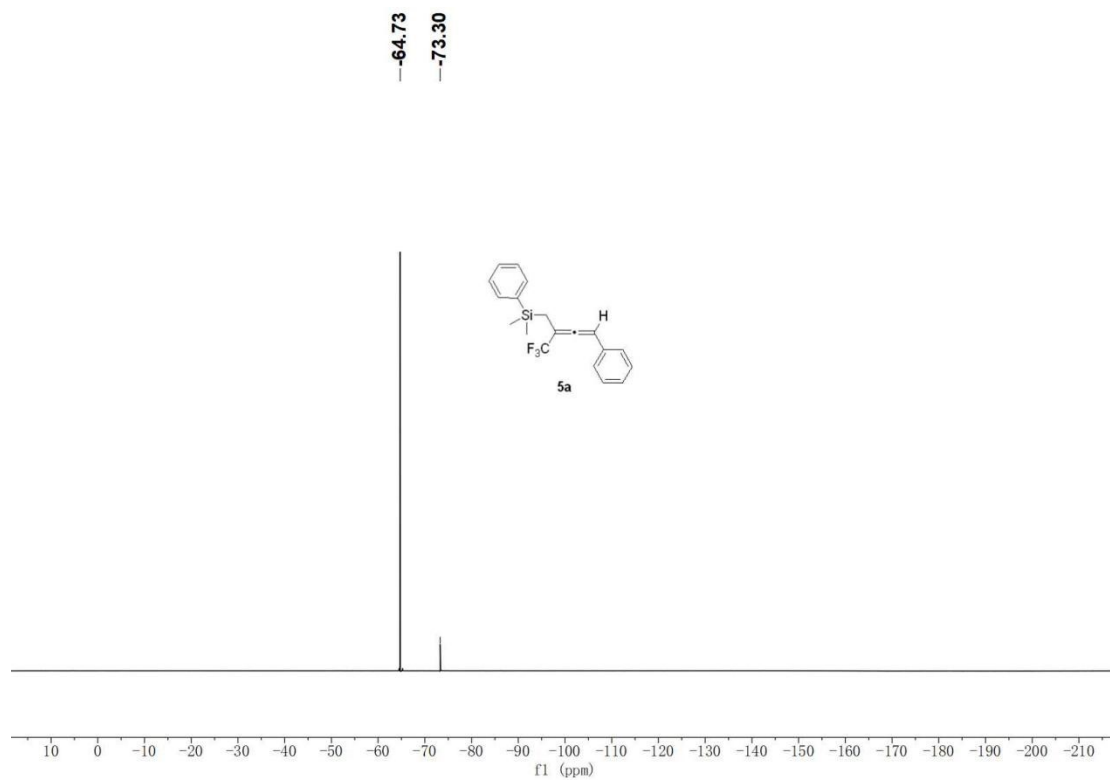

**Methyl 4-(3-((dimethyl(phenyl)silyl)methyl)-4,4,4-trifluorobuta-1,2-dien-1-yl)benzoate(5b)**

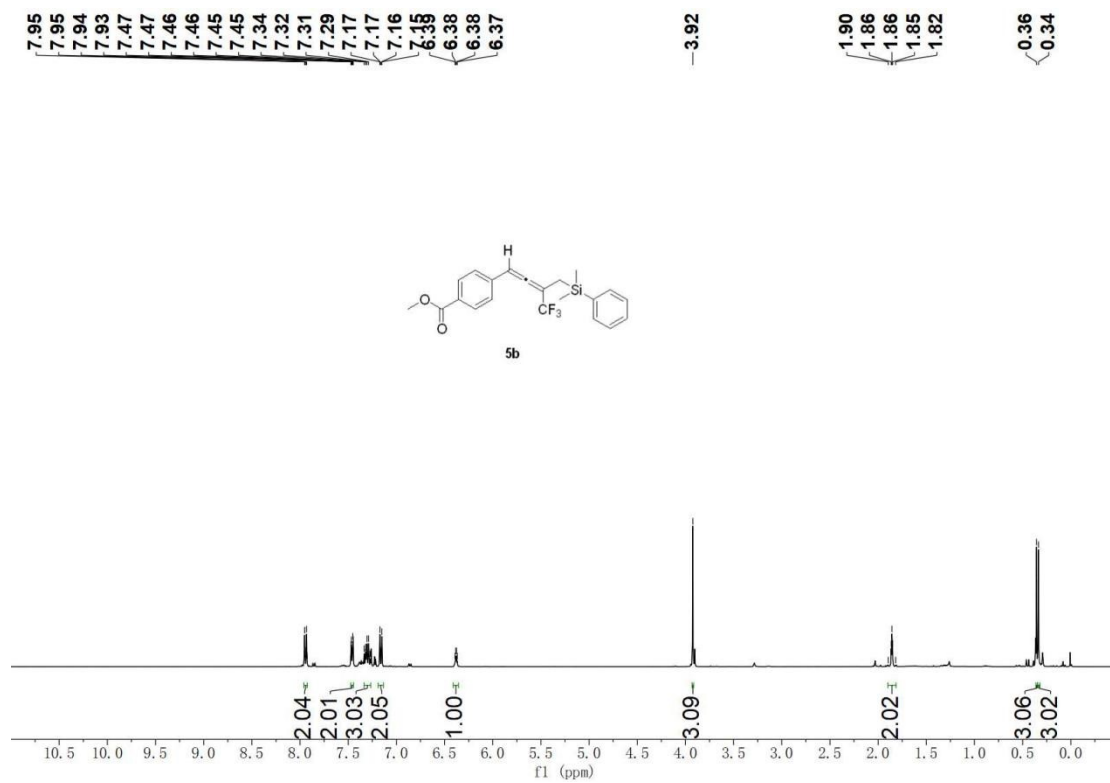

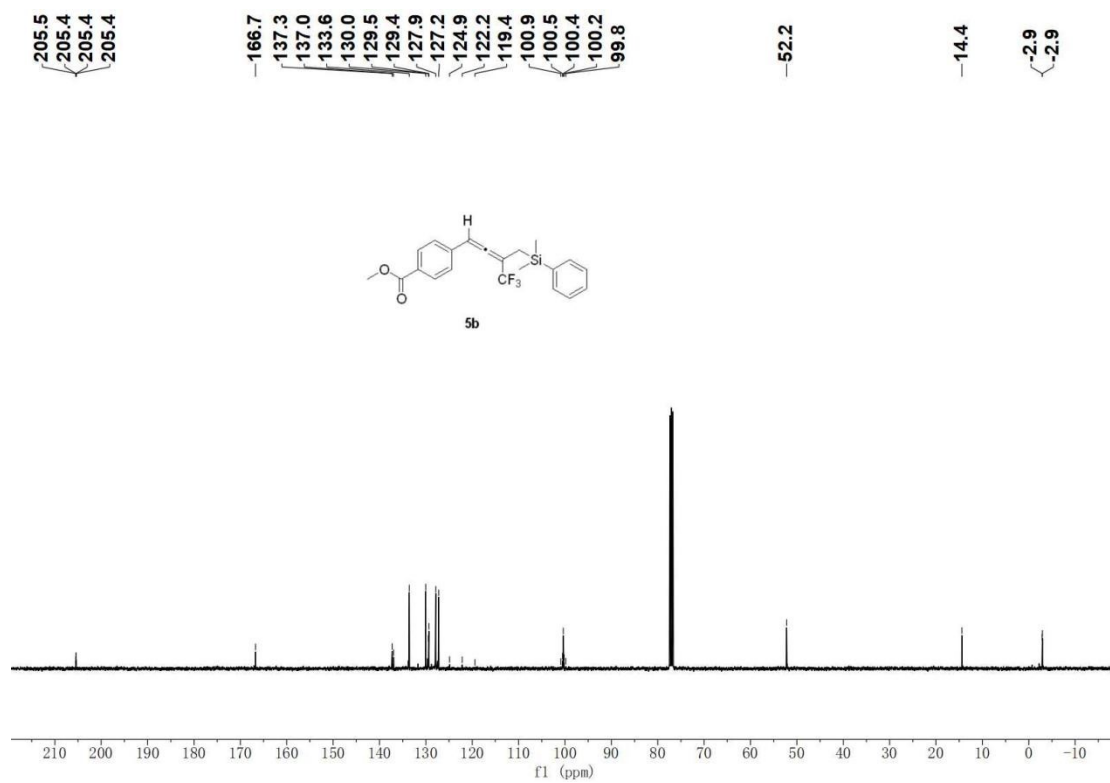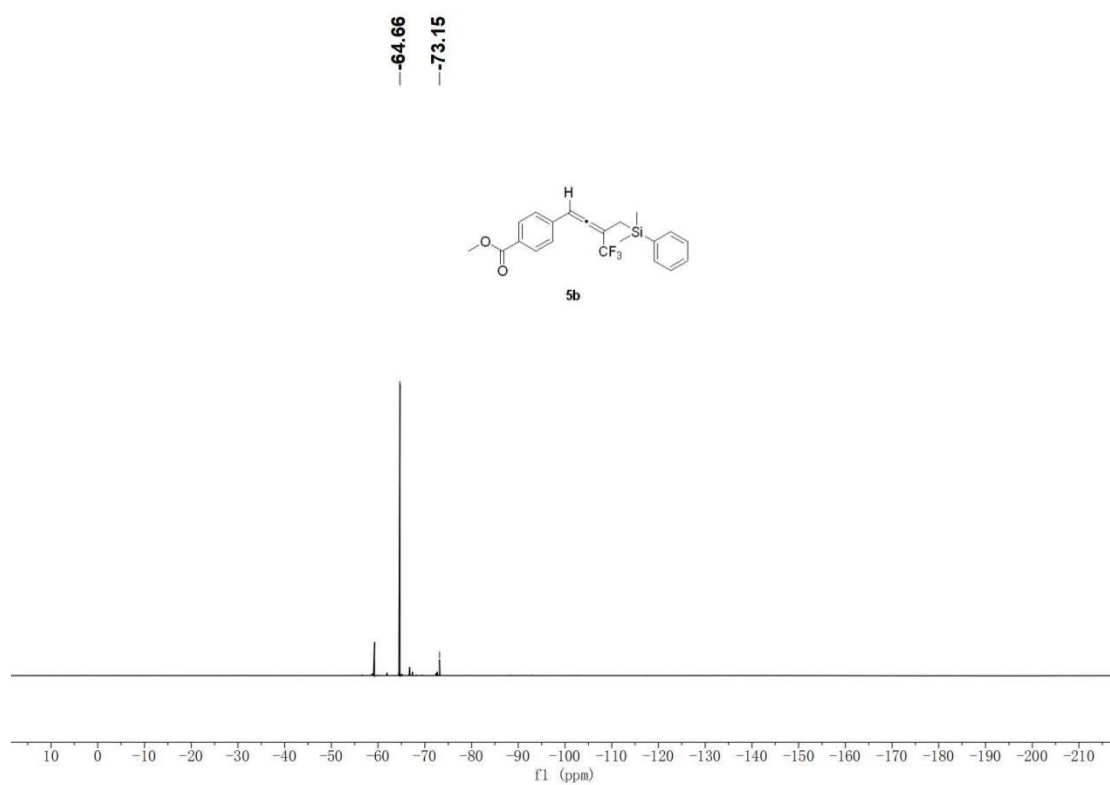

**Dimethyl(4-(4-nitrophenyl)-2-(trifluoromethyl)buta-2,3-dien-1-yl)(phenyl)silane (5c)**

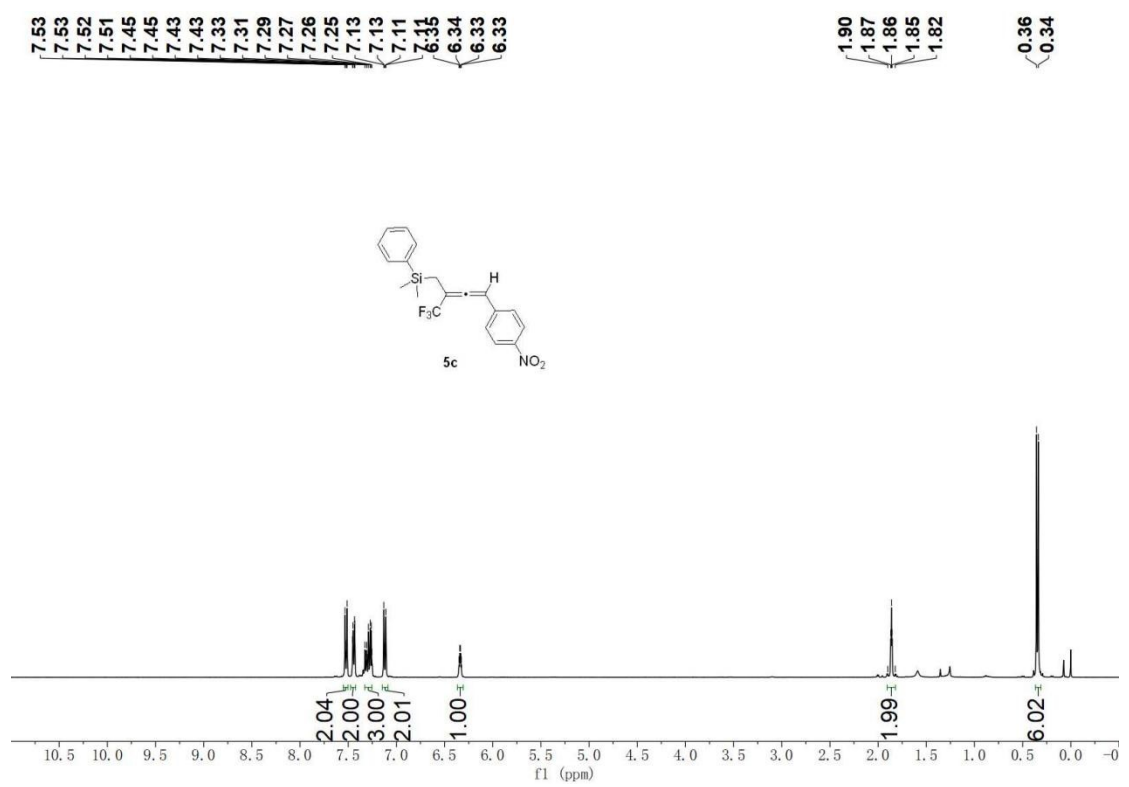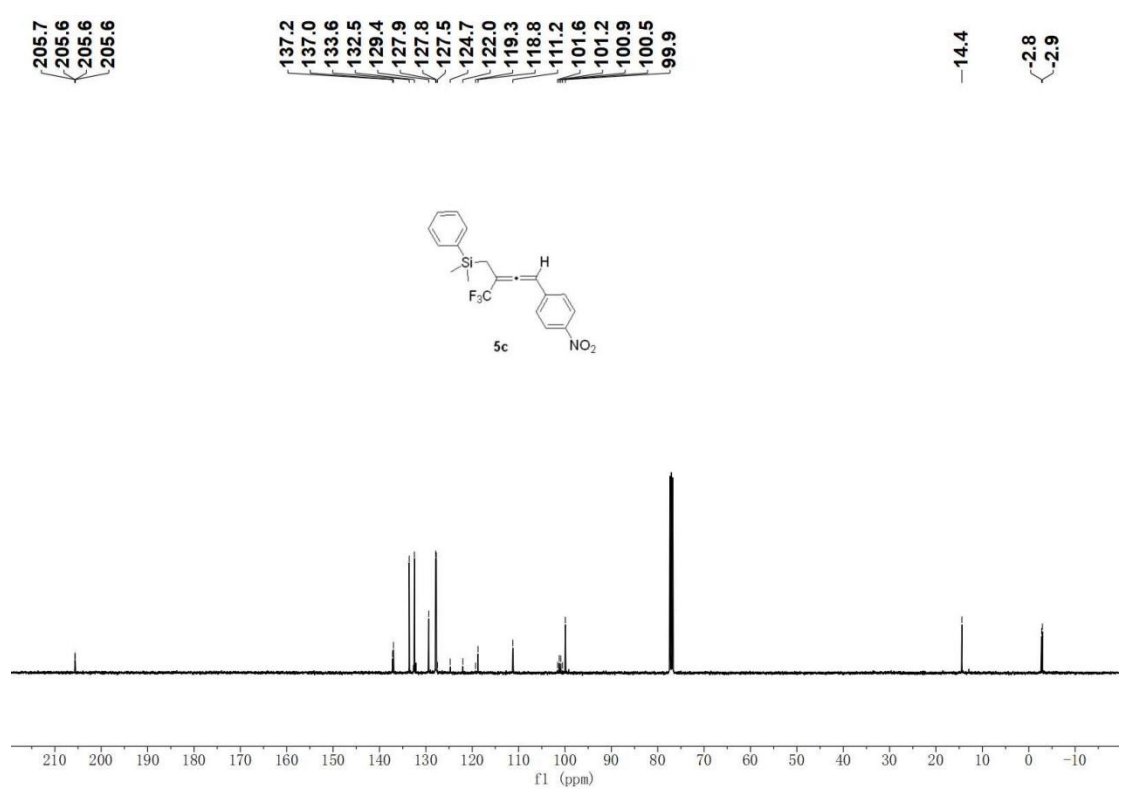

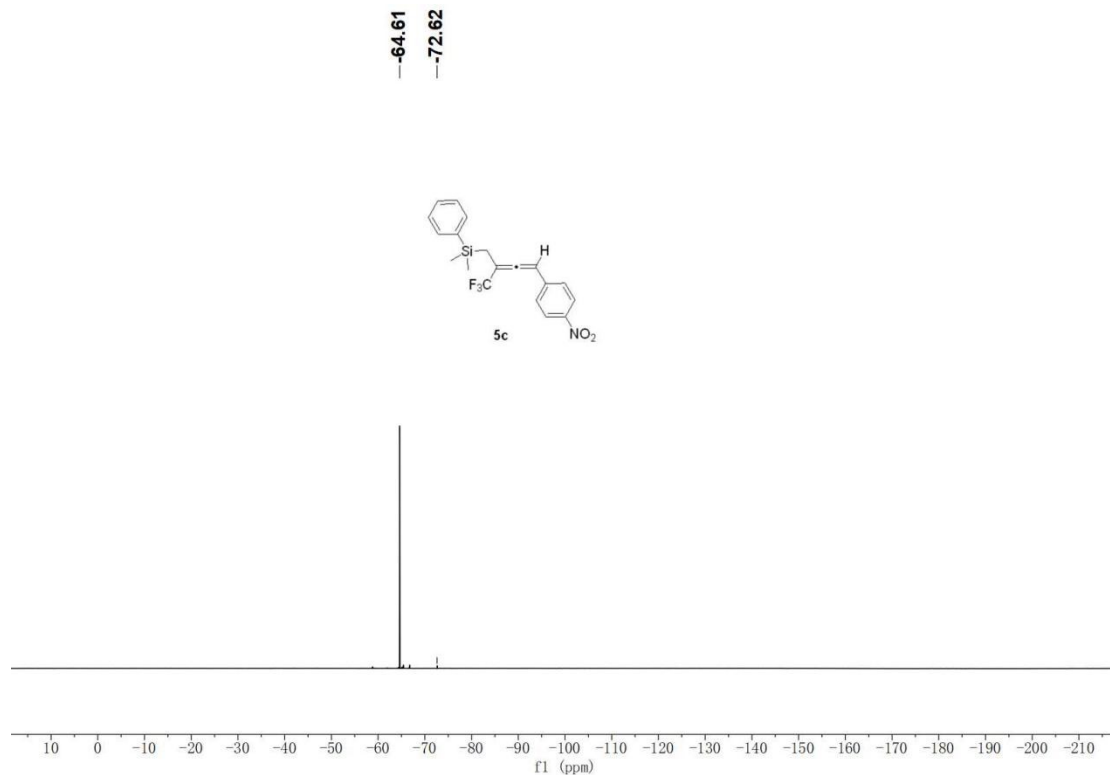

**(4-(4-fluorophenyl)-2-(trifluoromethyl)buta-2,3-dien-1-yl)dimethyl(phenyl)silane(5d)**

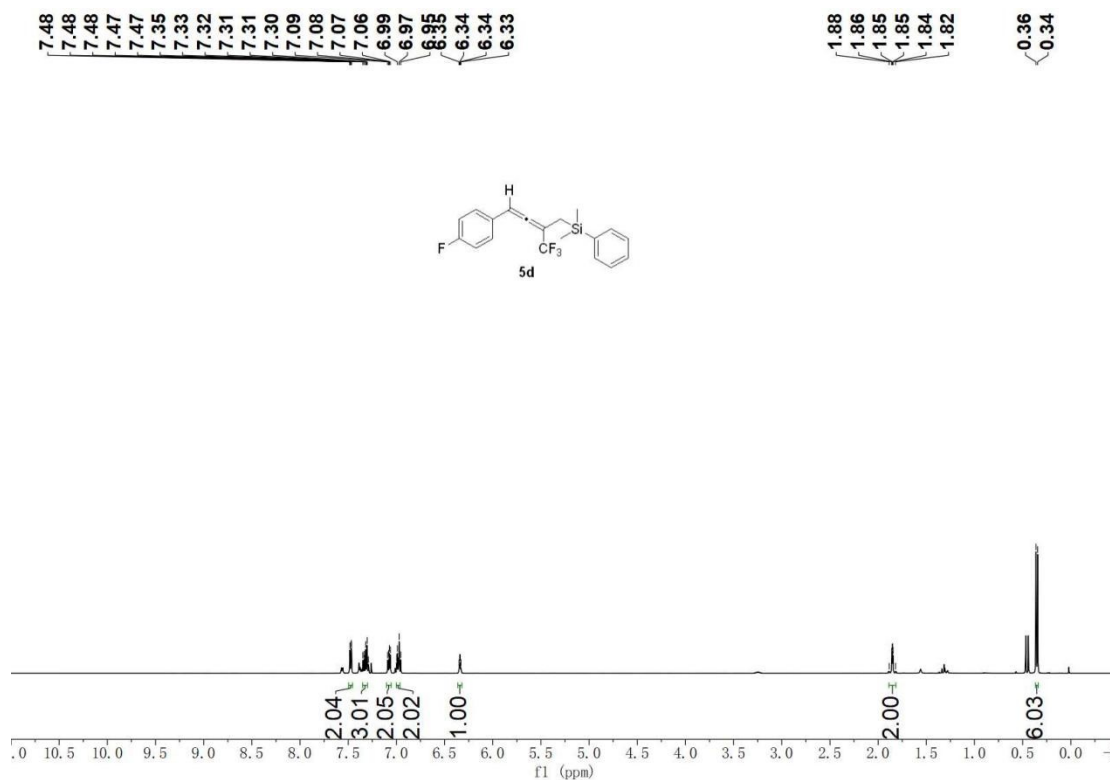

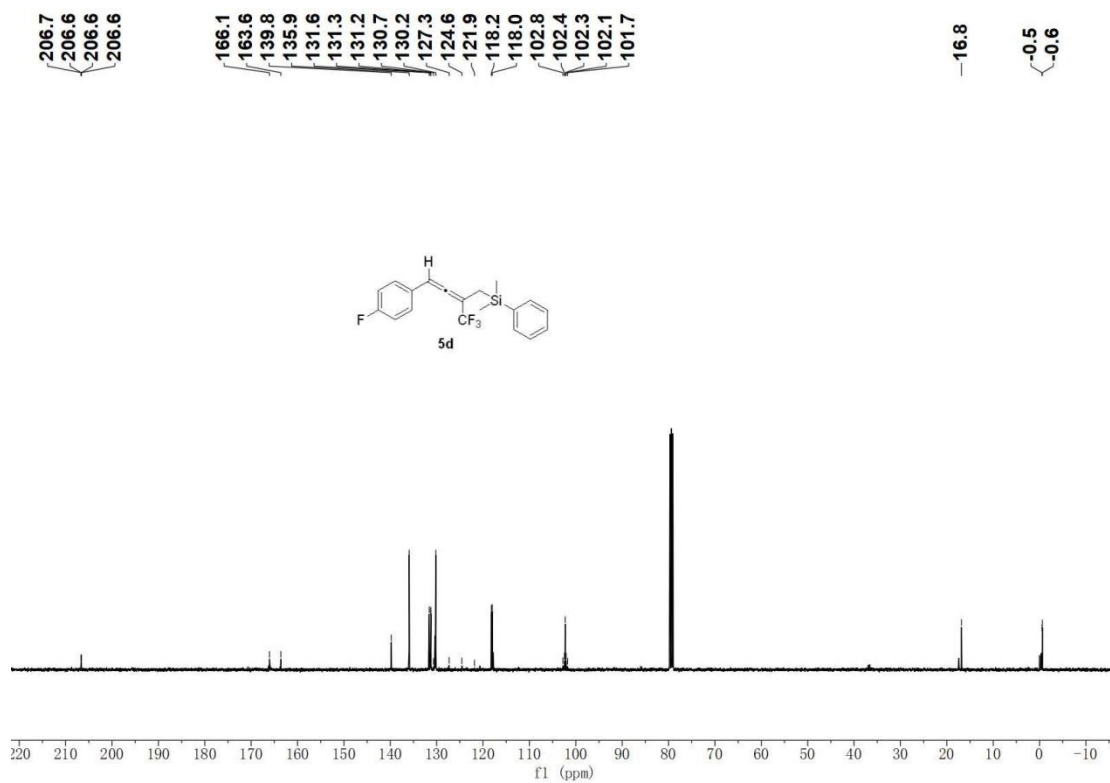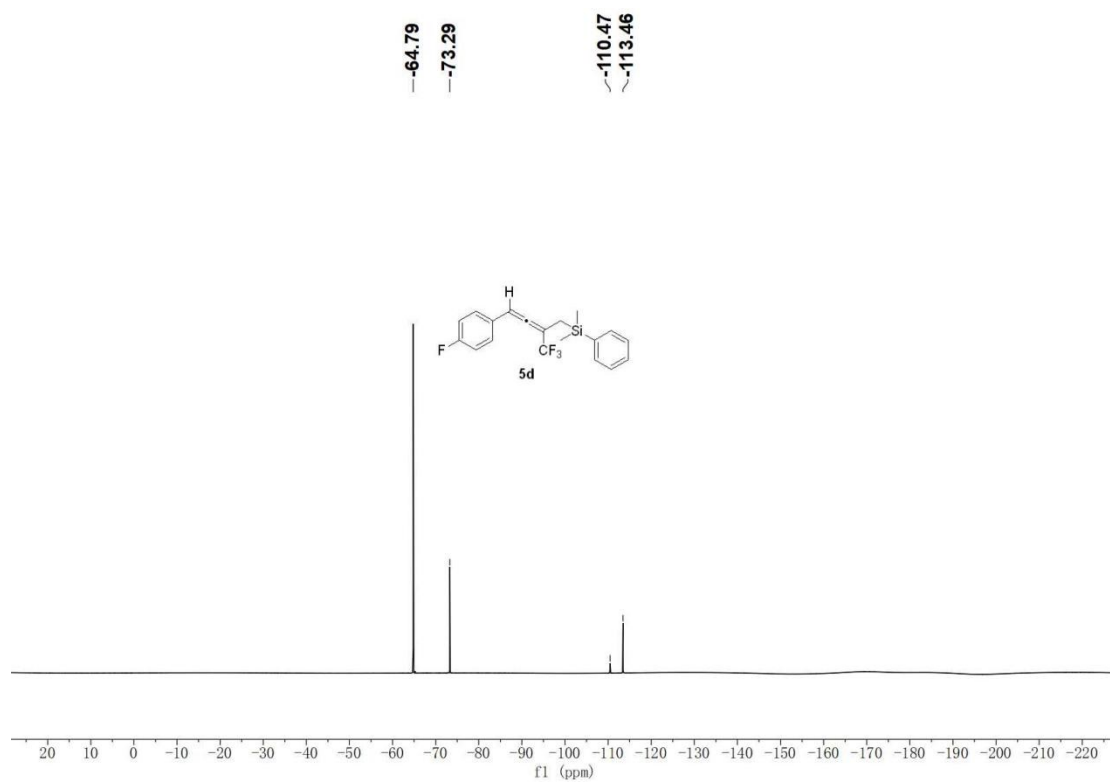

**(4-(4-chlorophenyl)-2-(trifluoromethyl)buta-2,3-dien-1-yl)dimethyl(phenyl)silane(5e)**

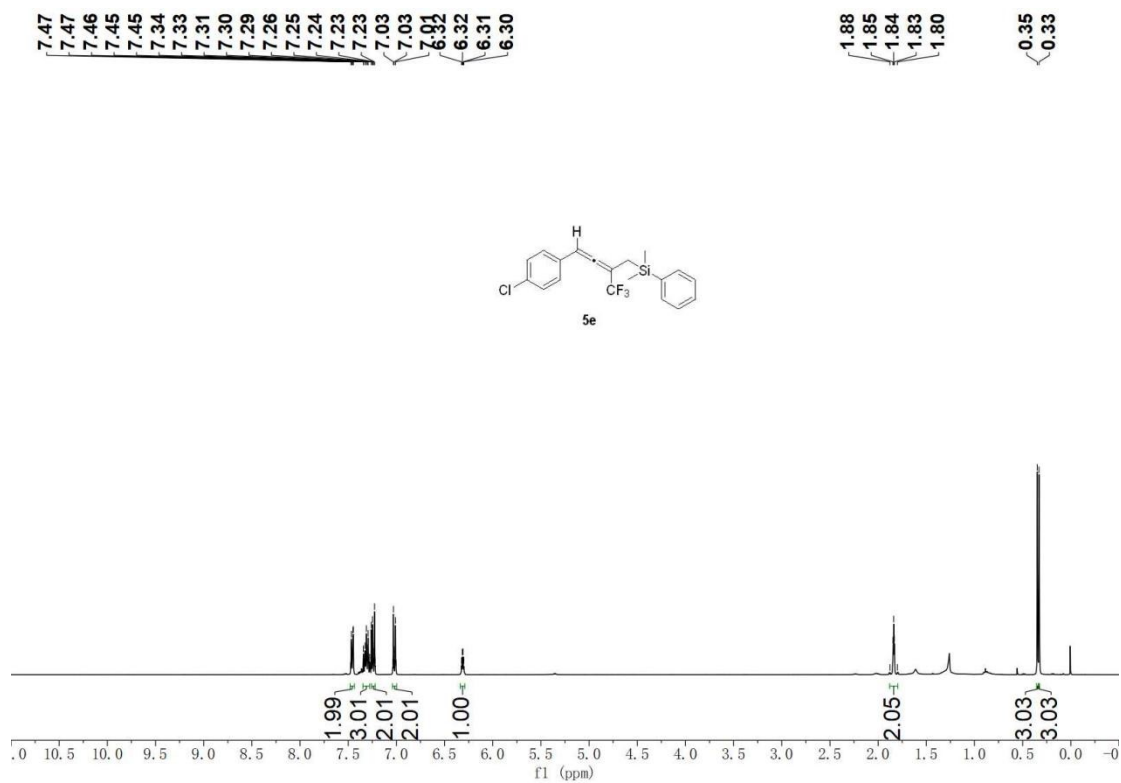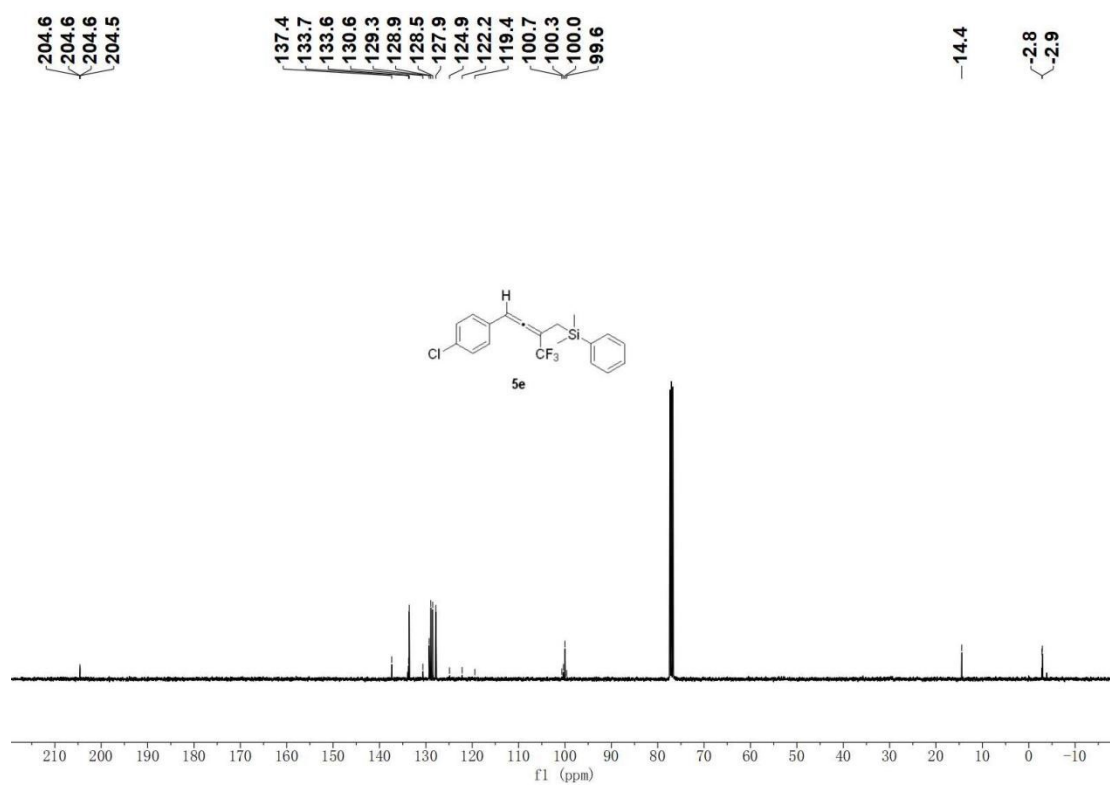

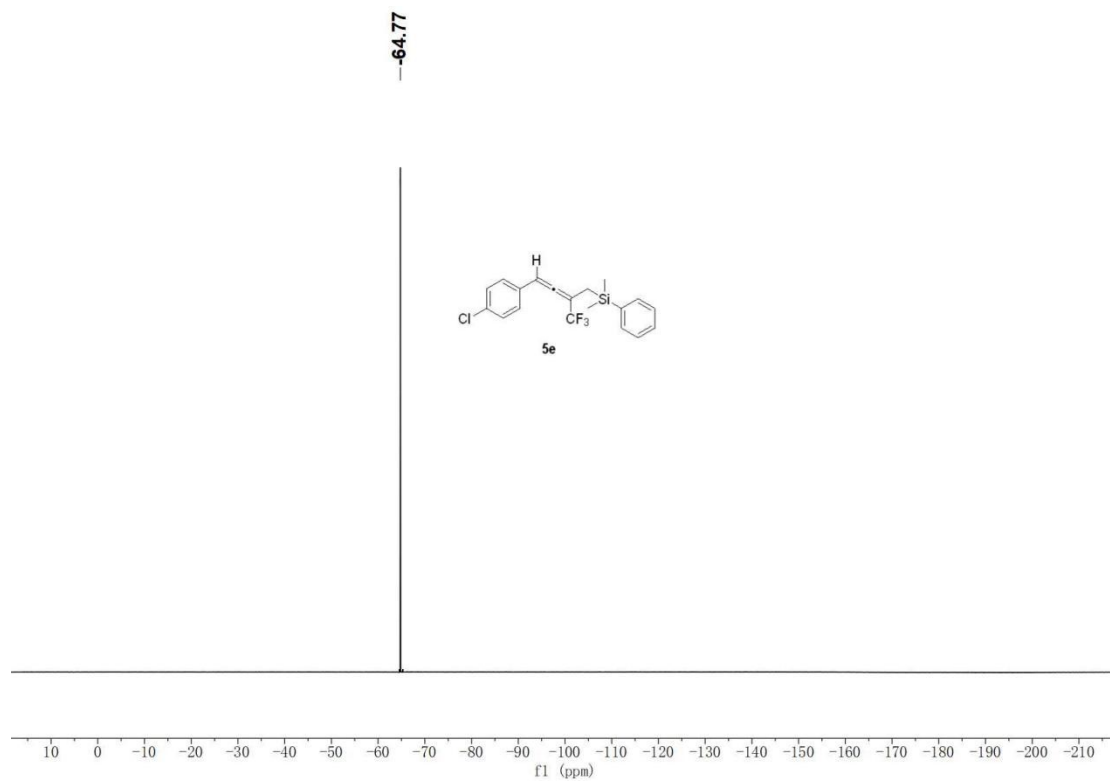

**(4-(3-chlorophenyl)-2-(trifluoromethyl)buta-2,3-dien-1-yl)dimethyl(phenyl)silane(5f)**

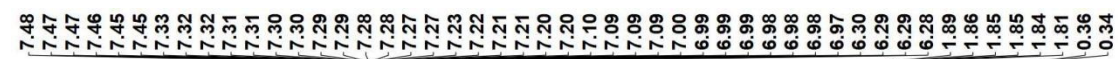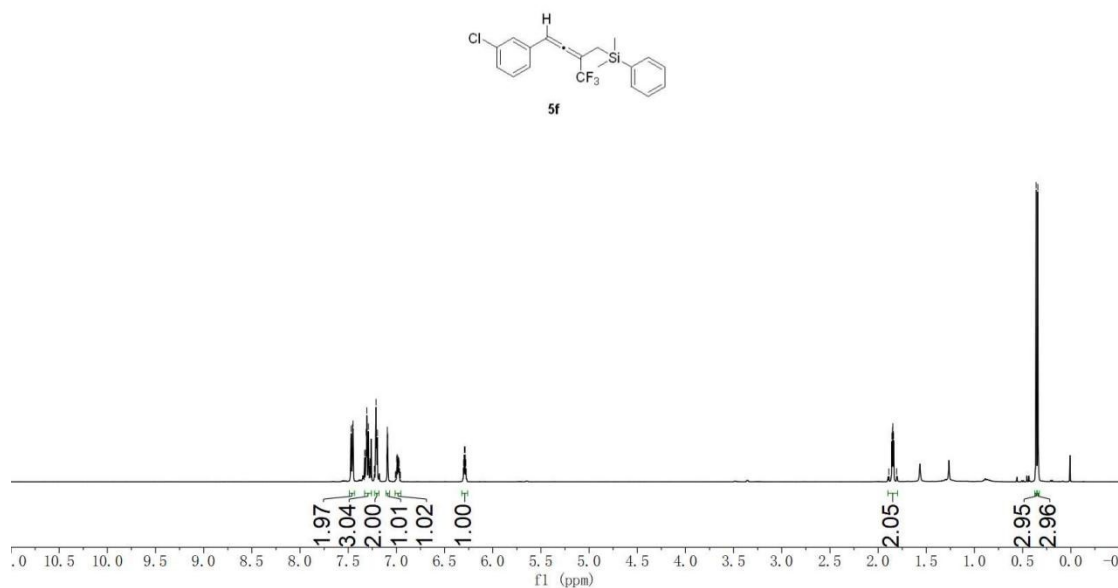

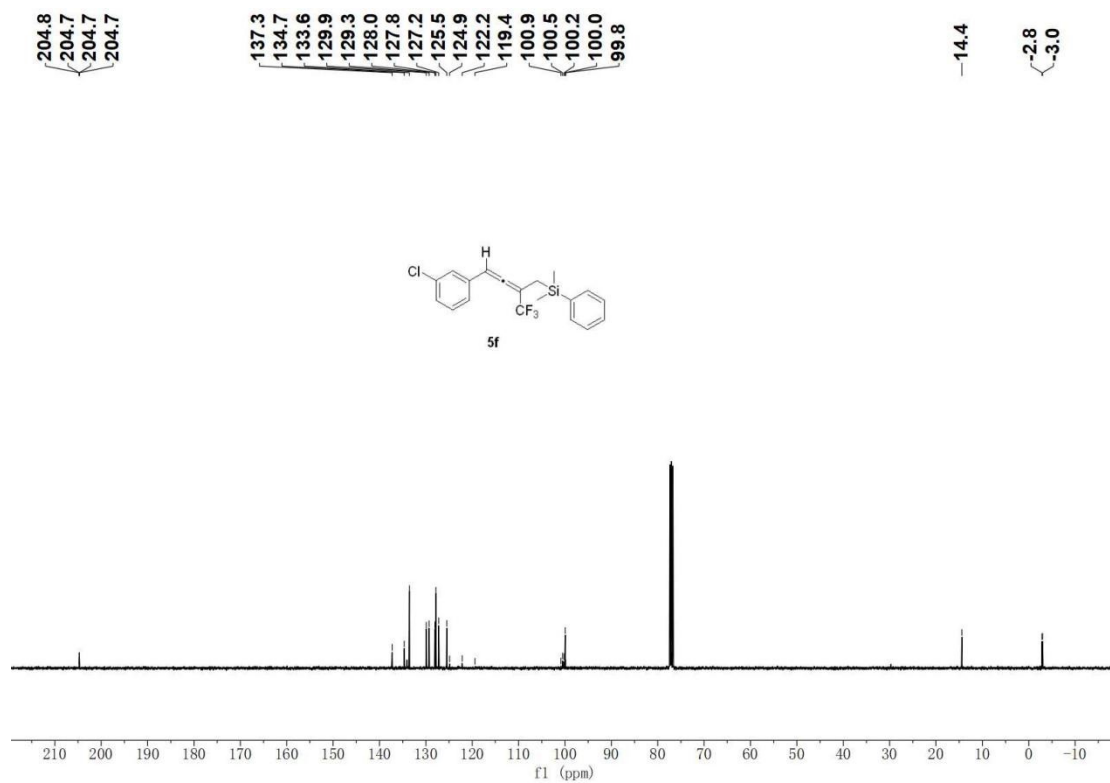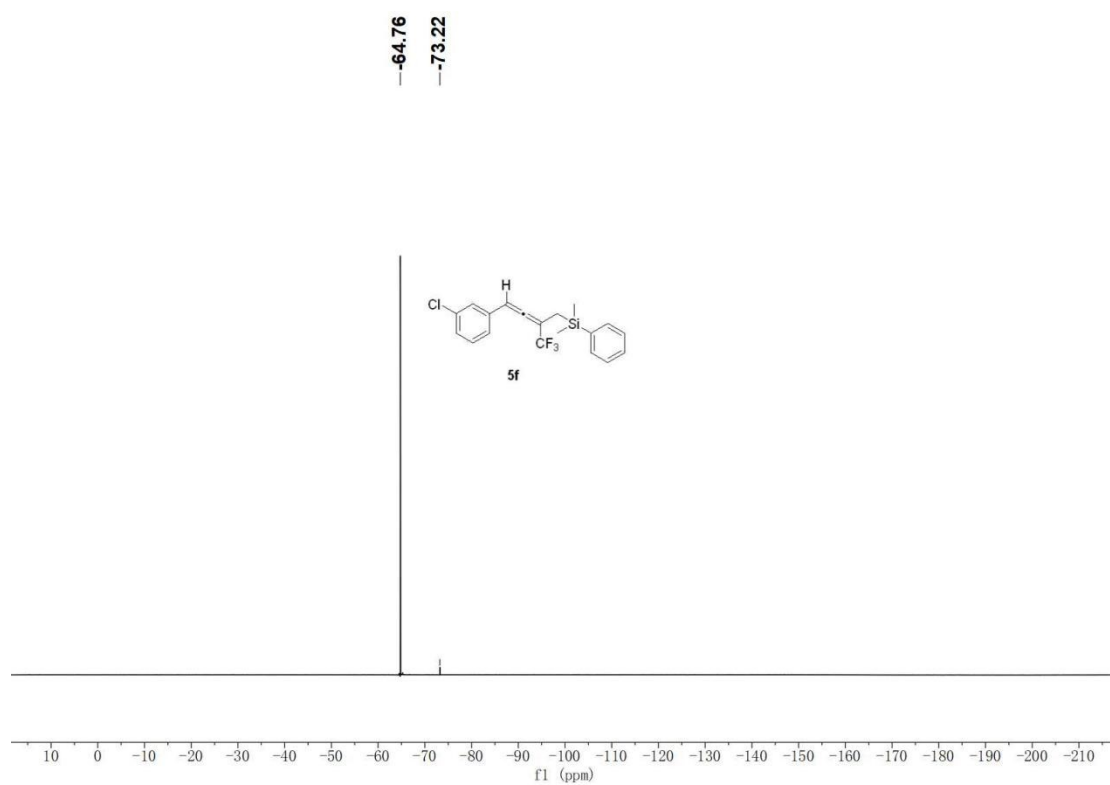

**(4-(2-chlorophenyl)-2-(trifluoromethyl)buta-2,3-dien-1-yl)dimethyl(phenyl)silane(5g)**



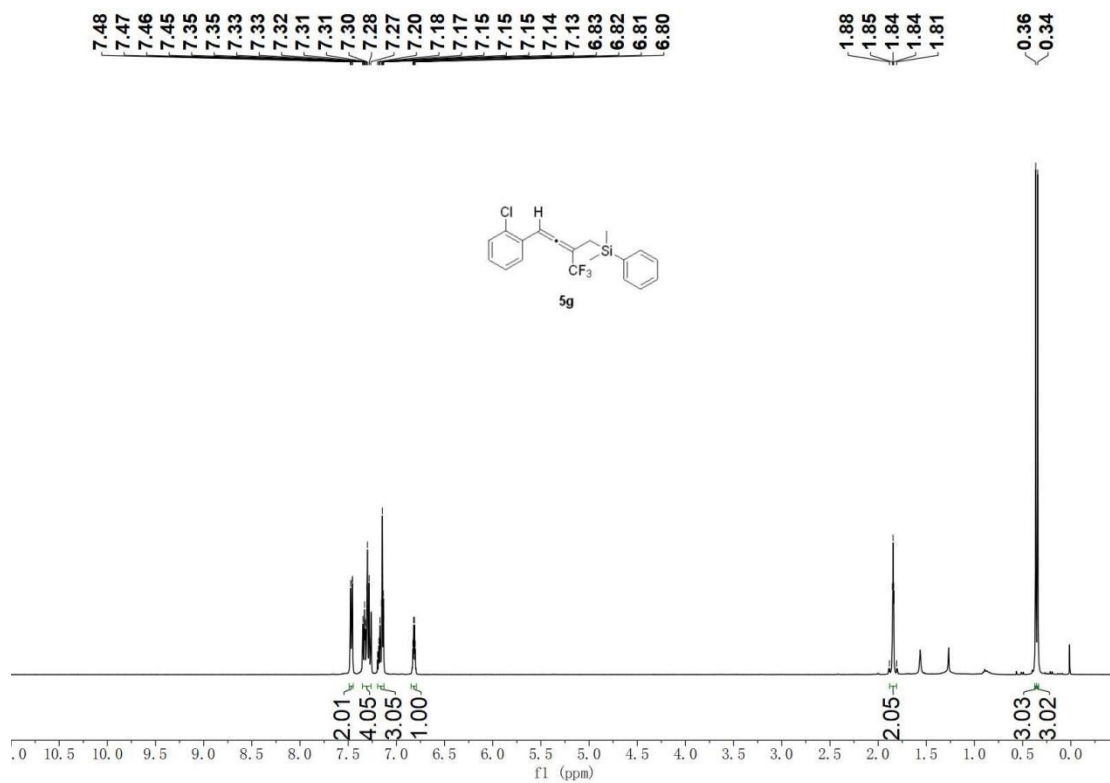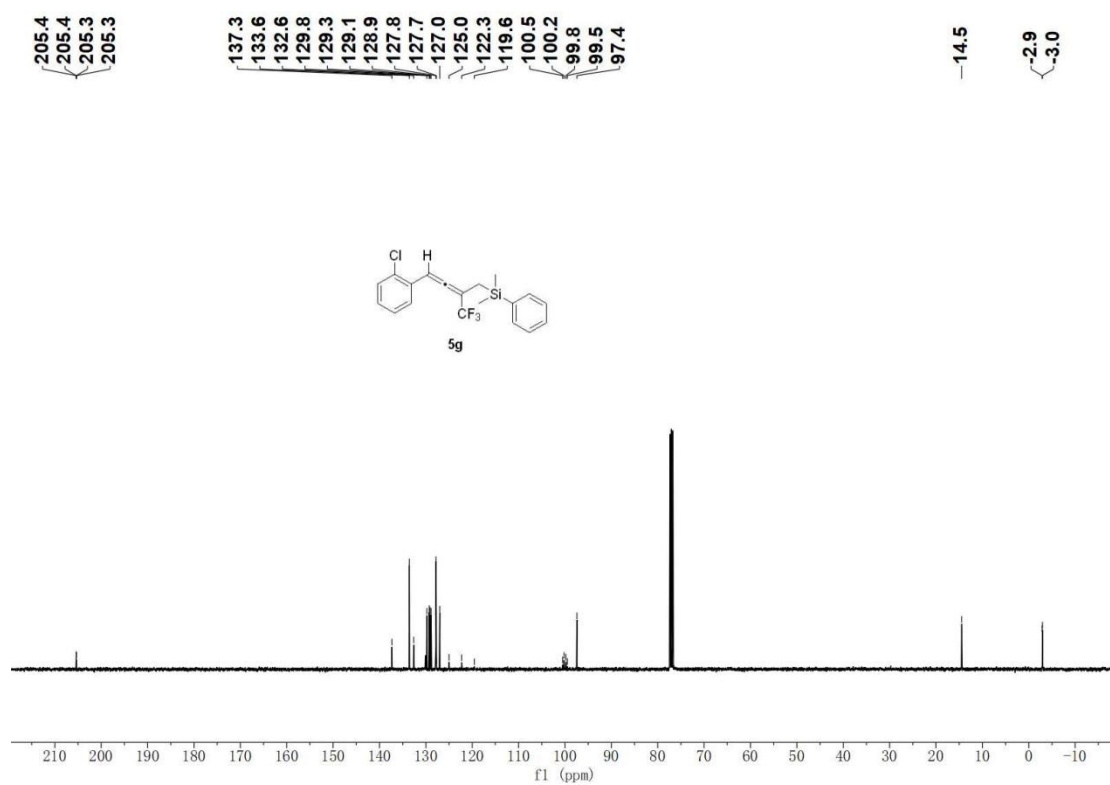

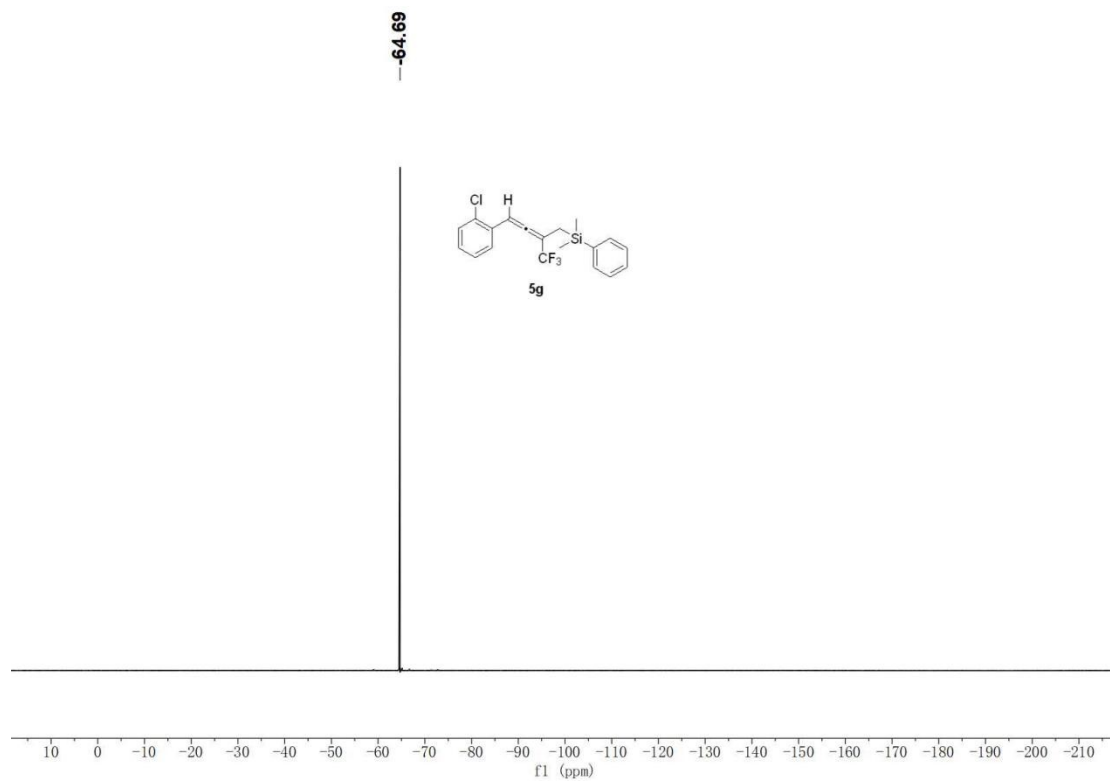

**(4-(4-bromophenyl)-2-(trifluoromethyl)buta-2,3-dien-1-yl)dimethyl(phenyl)silane(5h)**

7.48 7.47 7.46 7.45 7.41 7.40 7.39 7.38 7.35 7.33 7.32 7.31 7.30 7.30 6.97 6.97 6.96 6.95 6.30 6.30 6.29 1.88 1.85 1.85 1.84 1.81 0.35 0.34

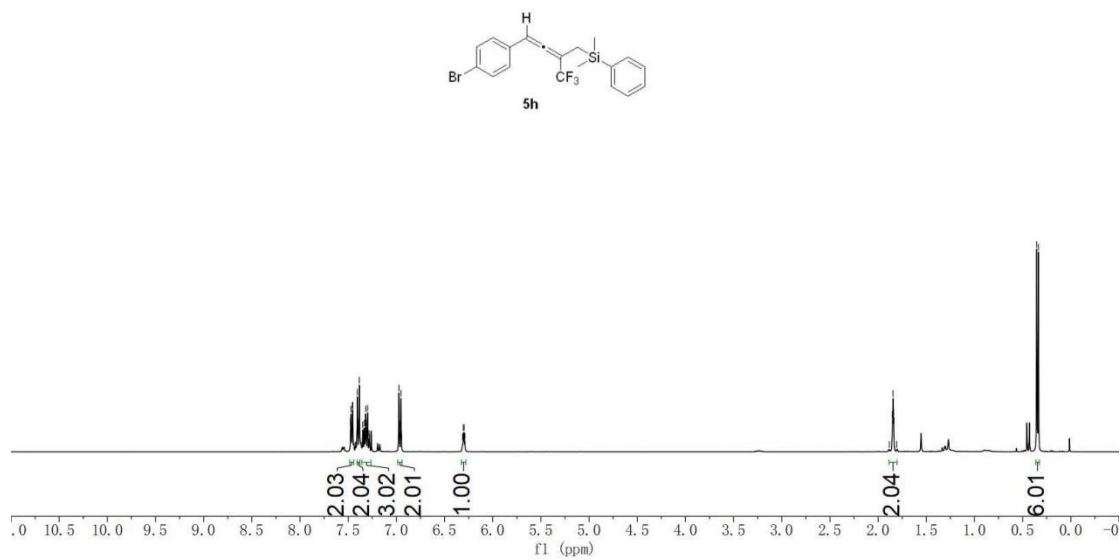

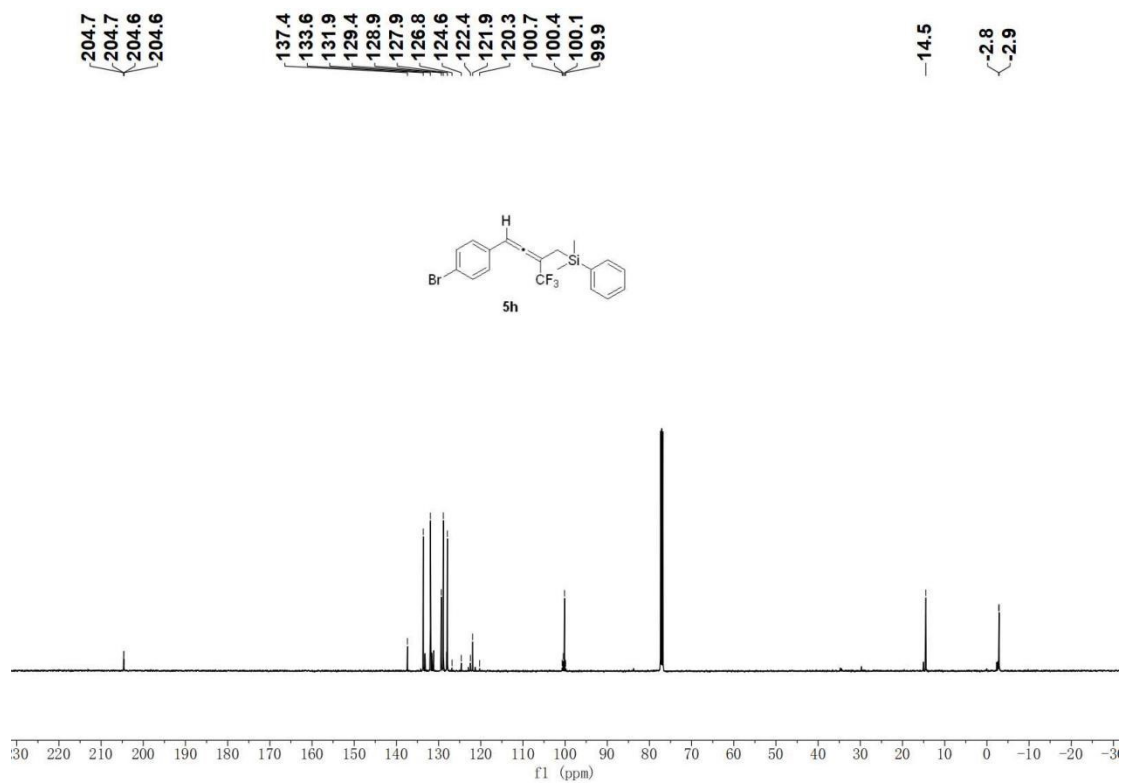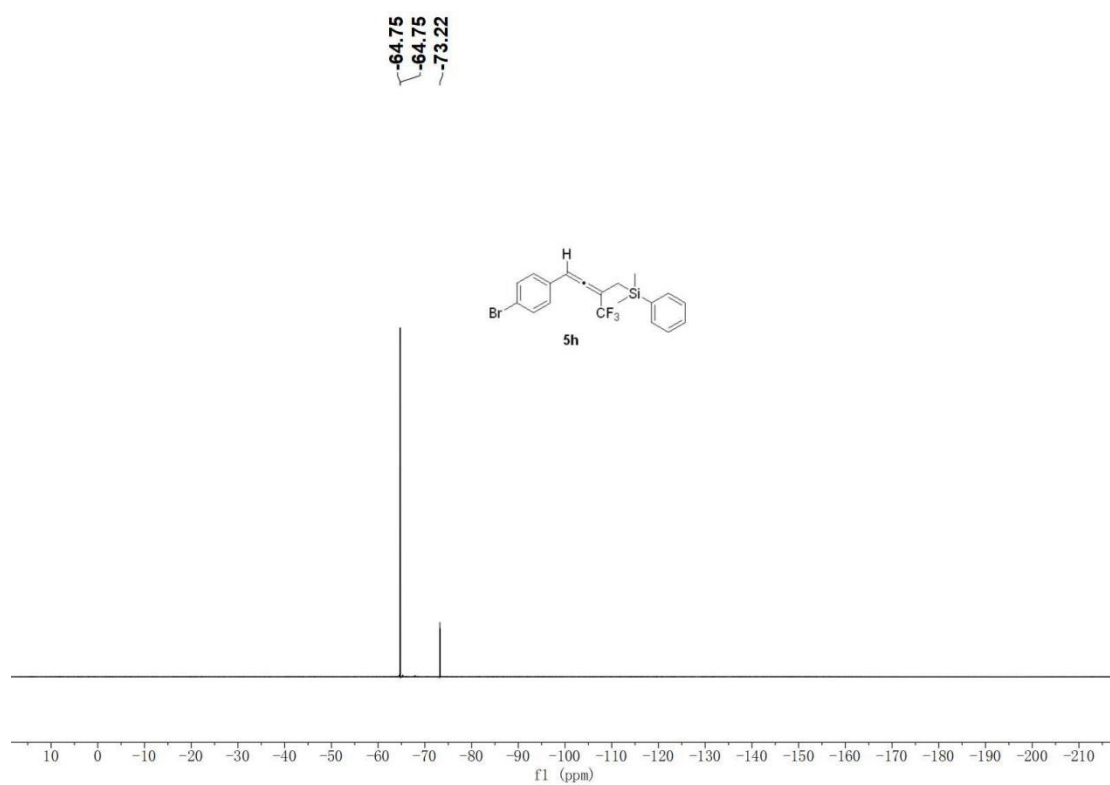

**dimethyl(phenyl)(4-(thiophen-2-yl)-2-(trifluoromethyl)buta-2,3-dien-1-yl)silane(5i)**

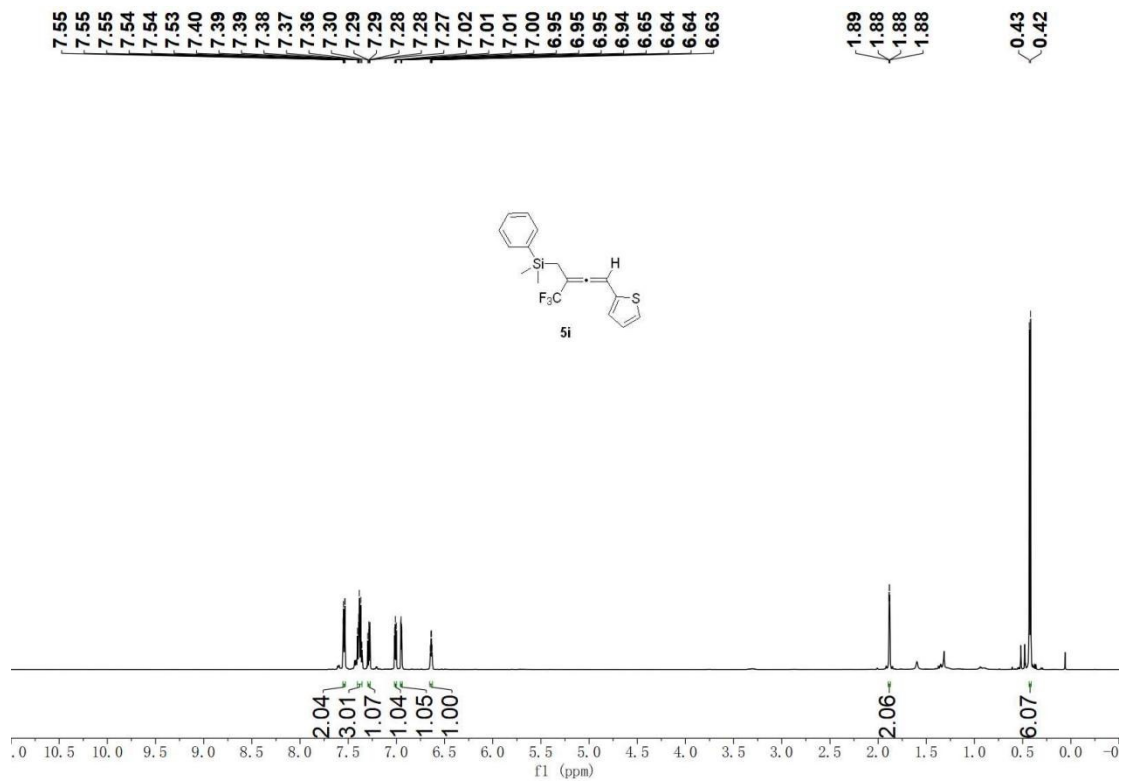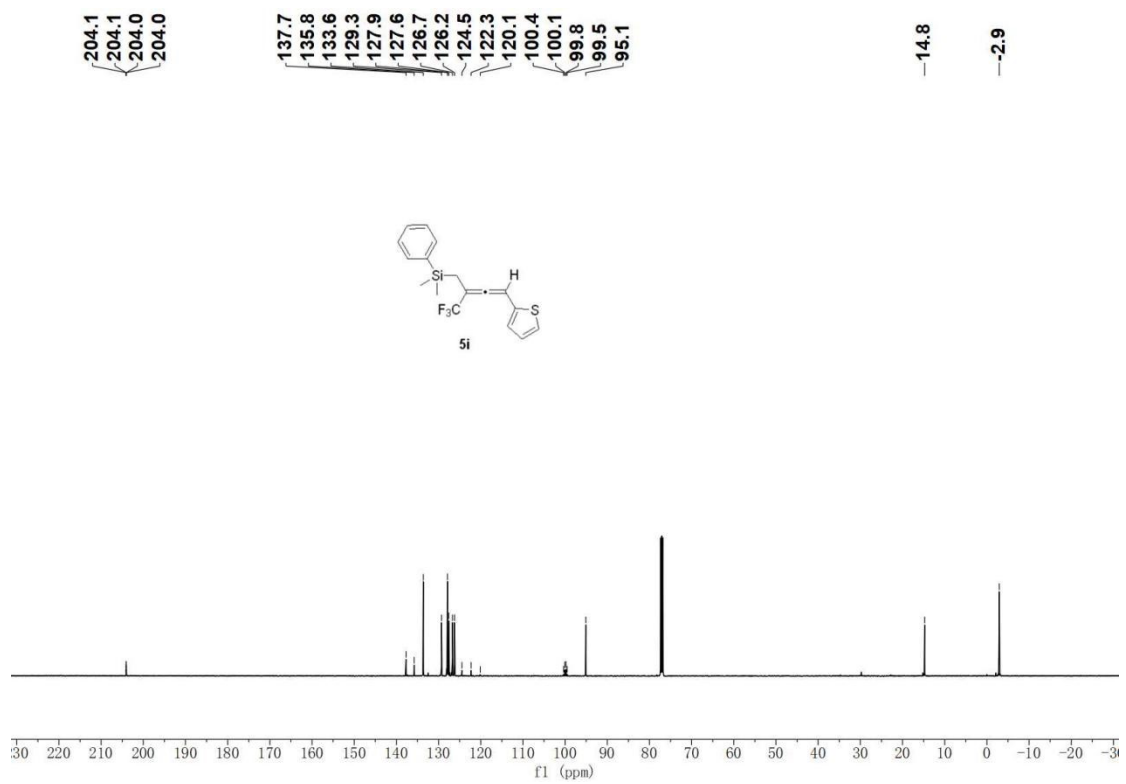

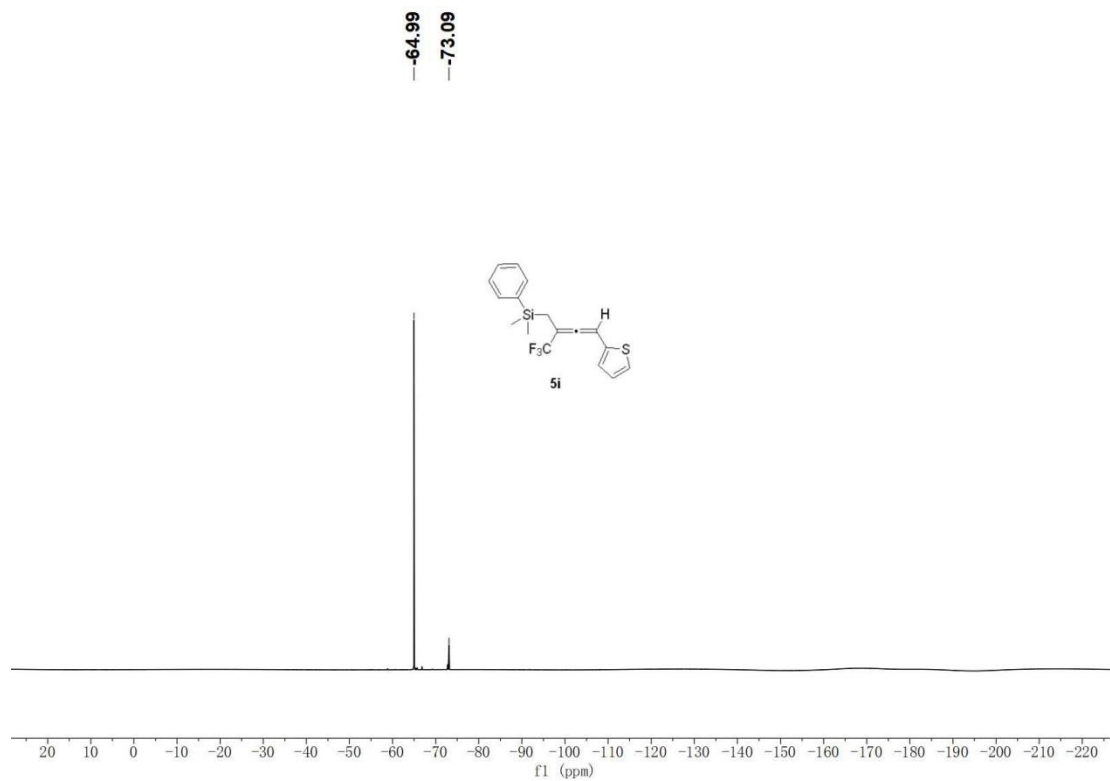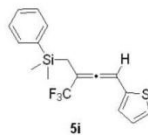

**(4-([1,1'-biphenyl]-4-yl)-2-(trifluoromethyl)buta-2,3-dien-1-yl)dimethyl(phenyl)silane(5j)**

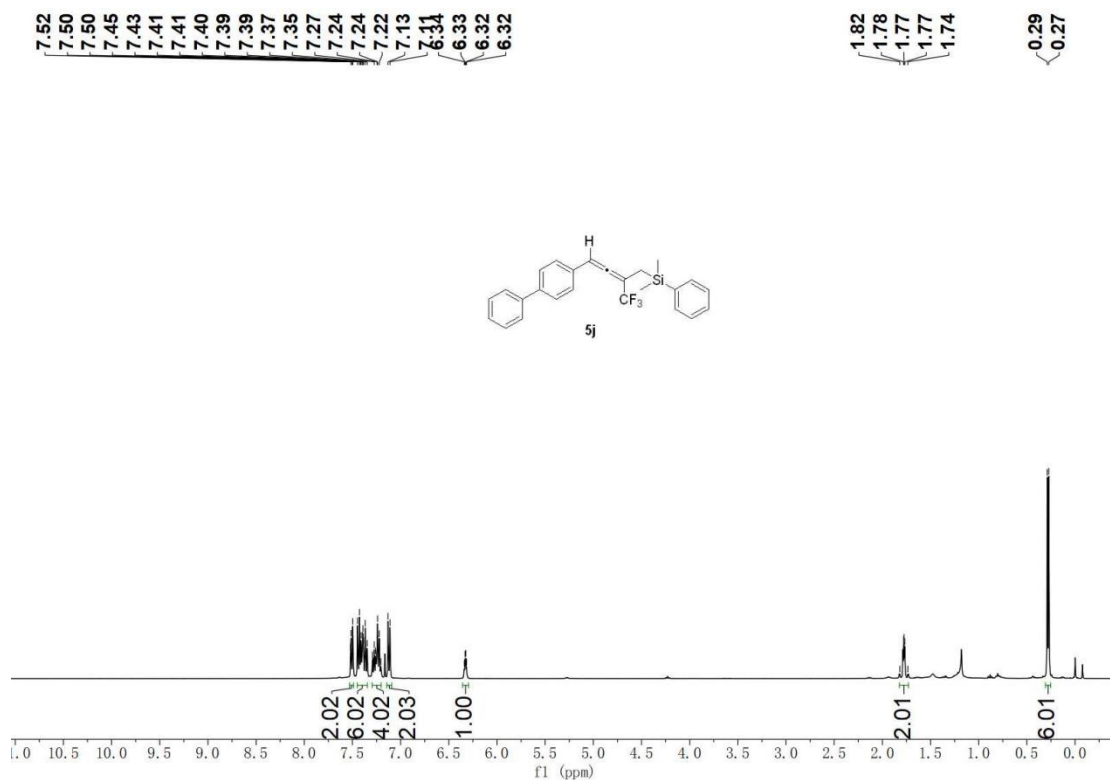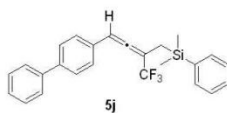

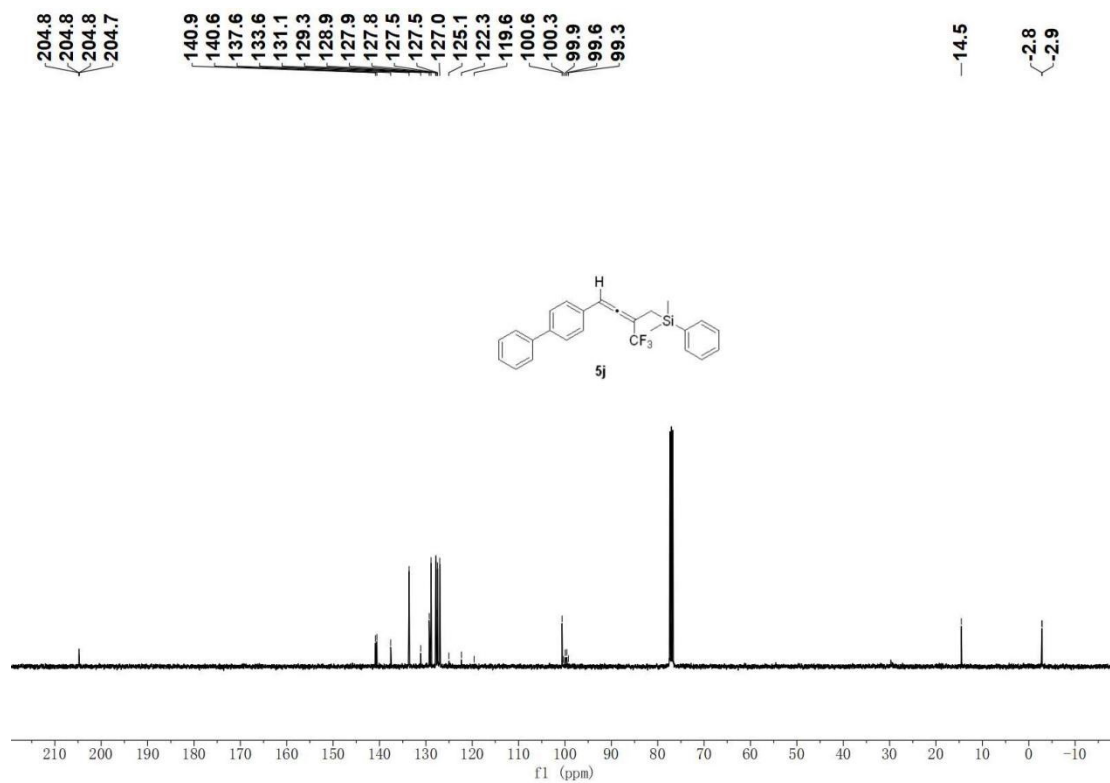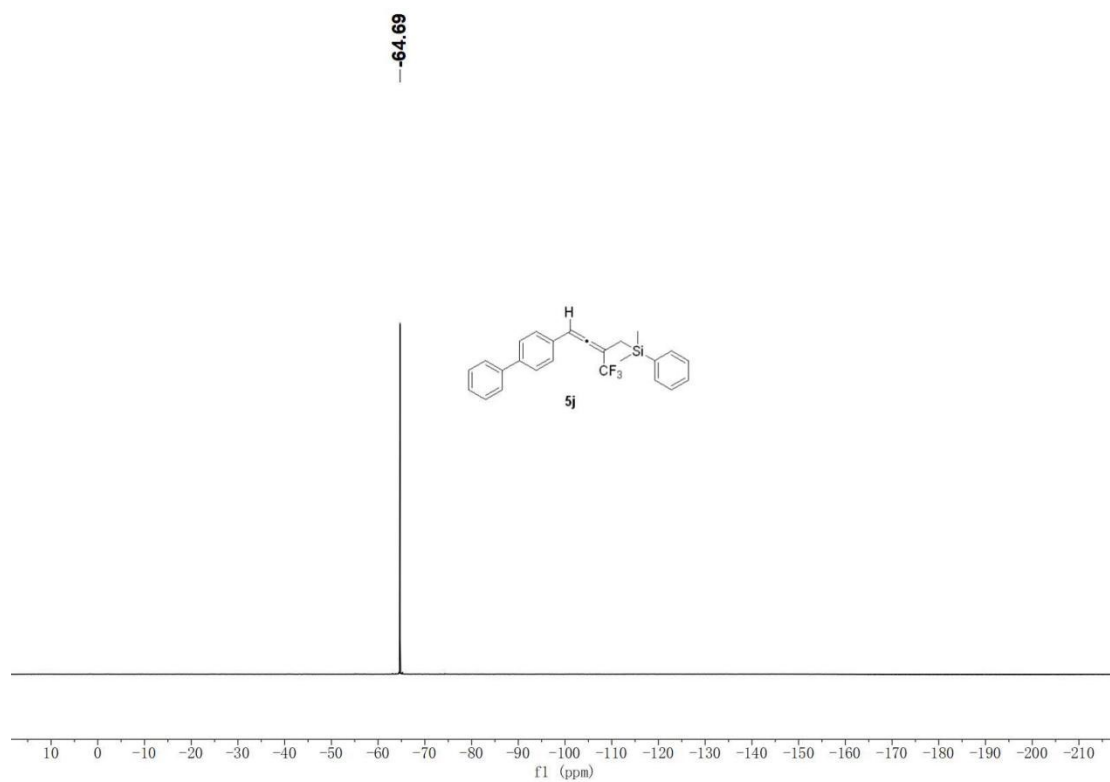

**Methyldiphenyl(4-phenyl-2-(trifluoromethyl)buta-2,3-dien-1-yl)silane(5k)**

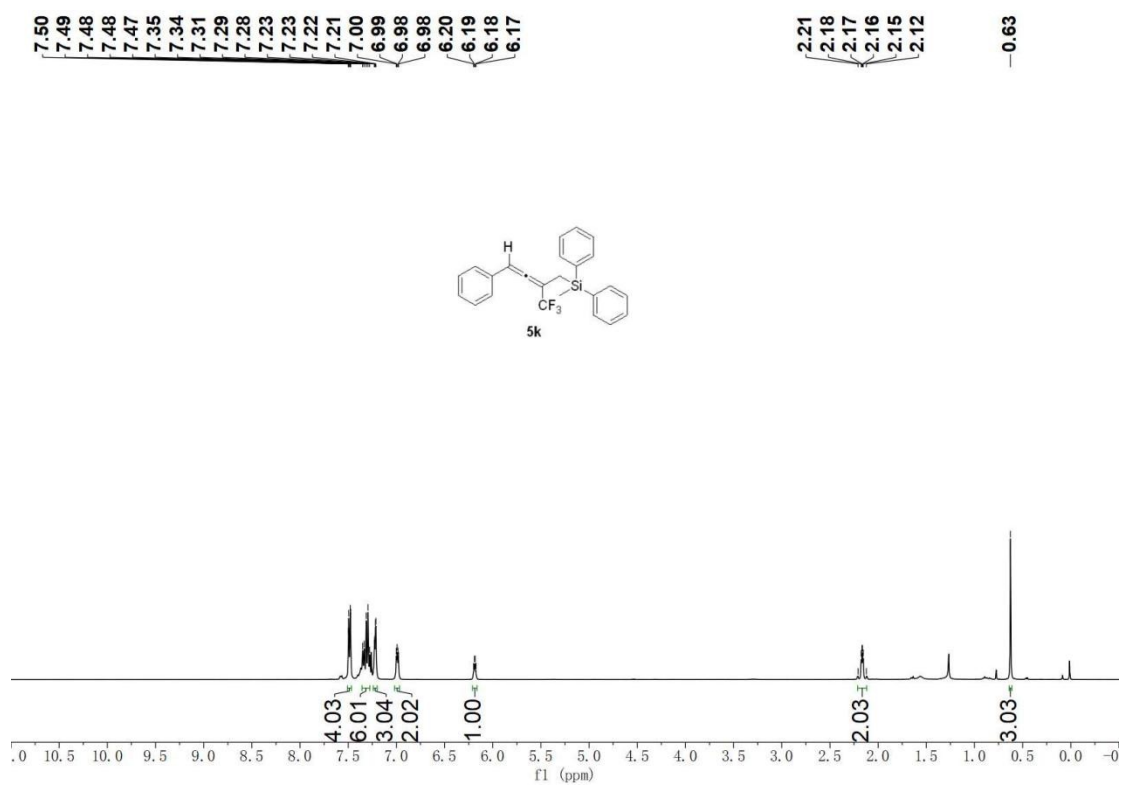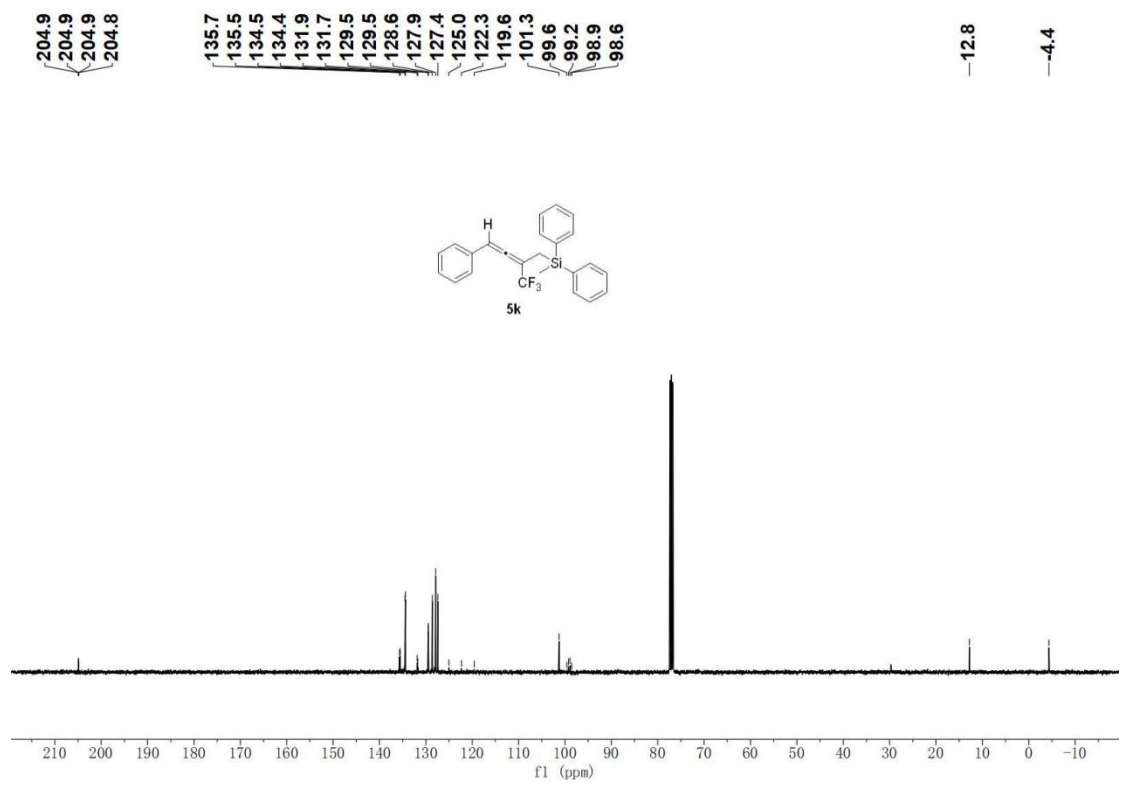

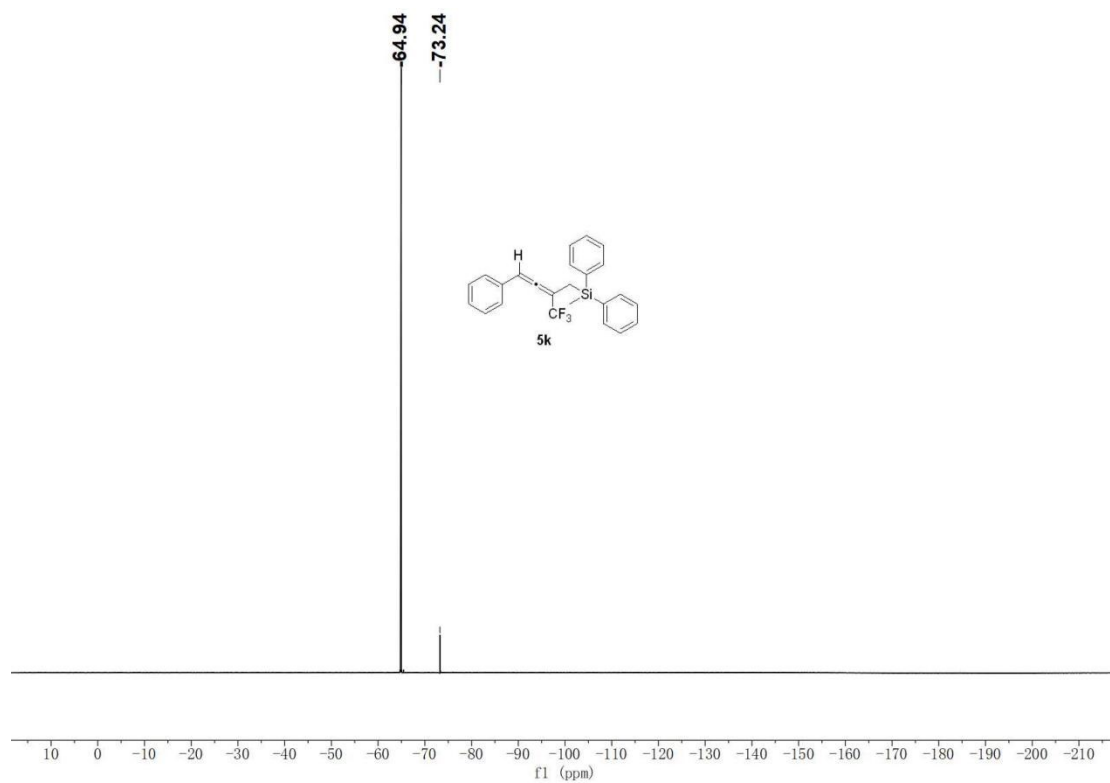

**1,4-bis(3-((dimethyl(phenyl)silyl)methyl)-4,4,4-trifluorobuta-1,2-dien-1-yl)benzene(5l)**

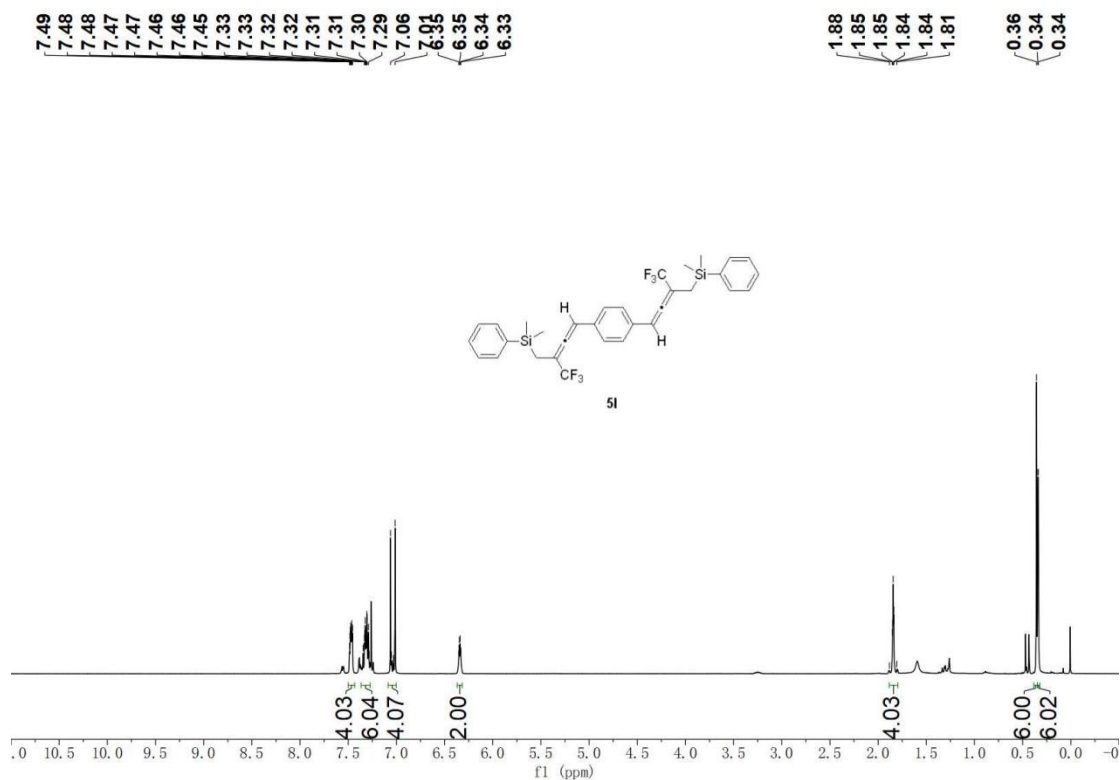



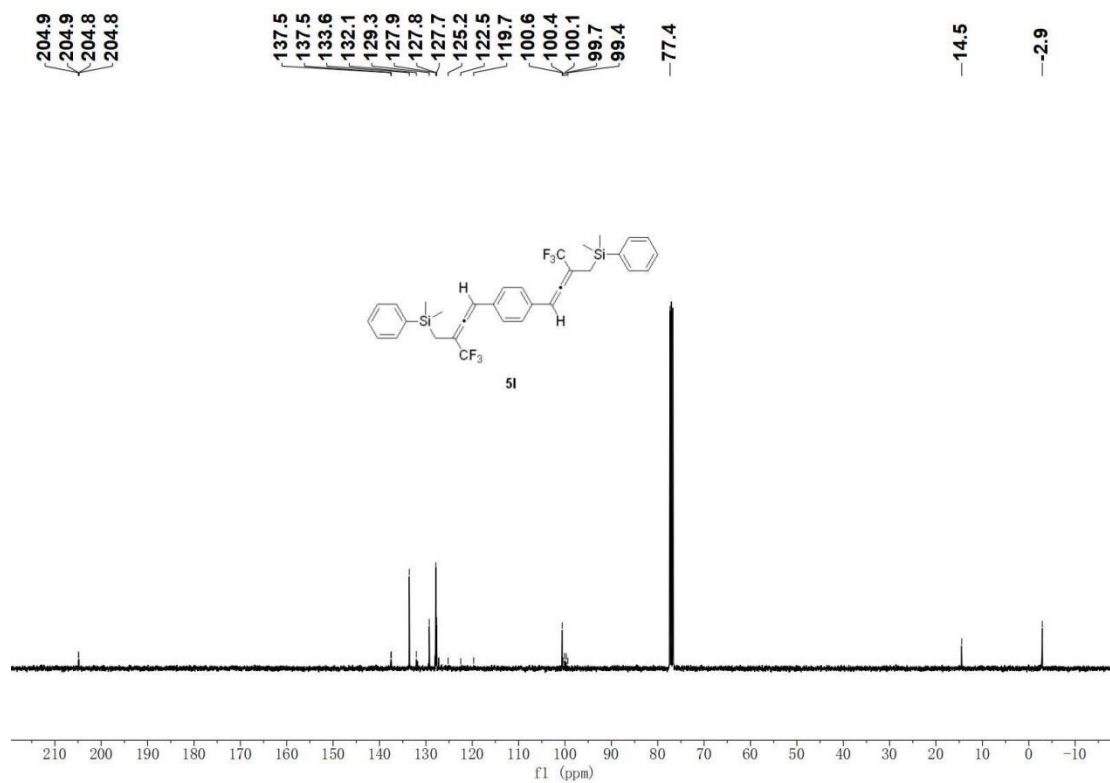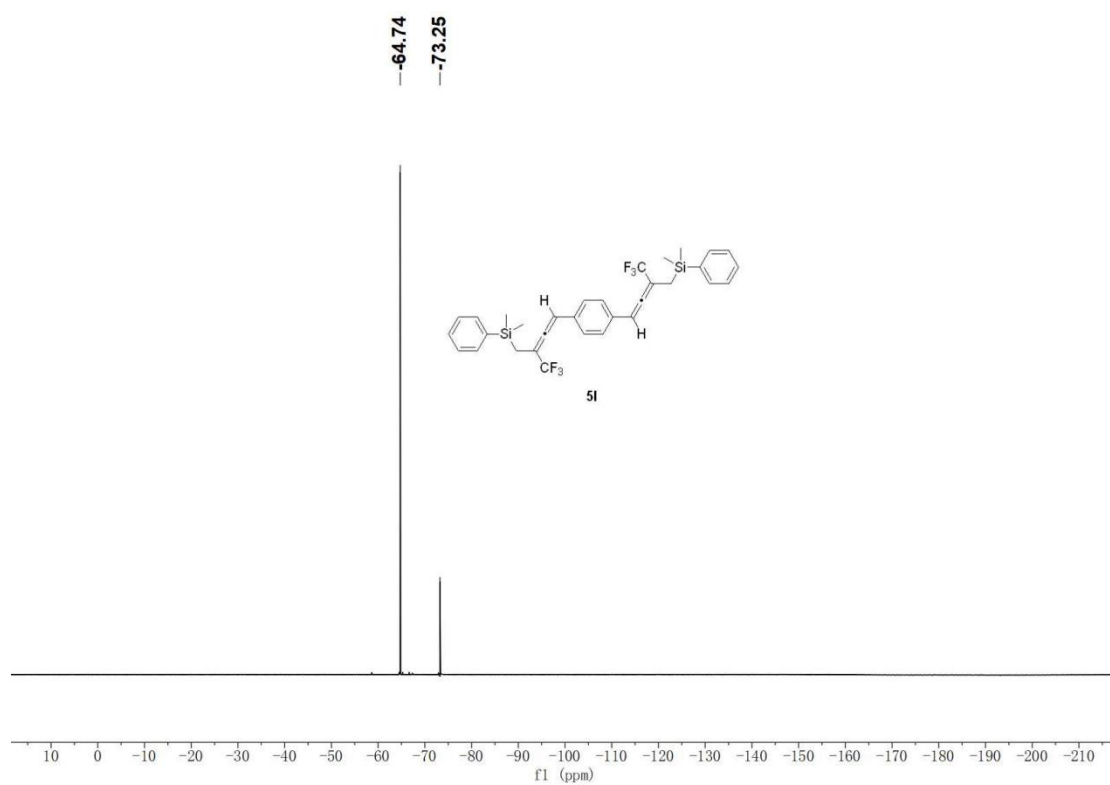

**2-isopropyl-5-methylcyclohexyl 4-(3-((dimethyl(phenyl)silyl)methyl)-4,4,4-trifluorobuta-1,2-dien-1-yl)benzoate(5m)**

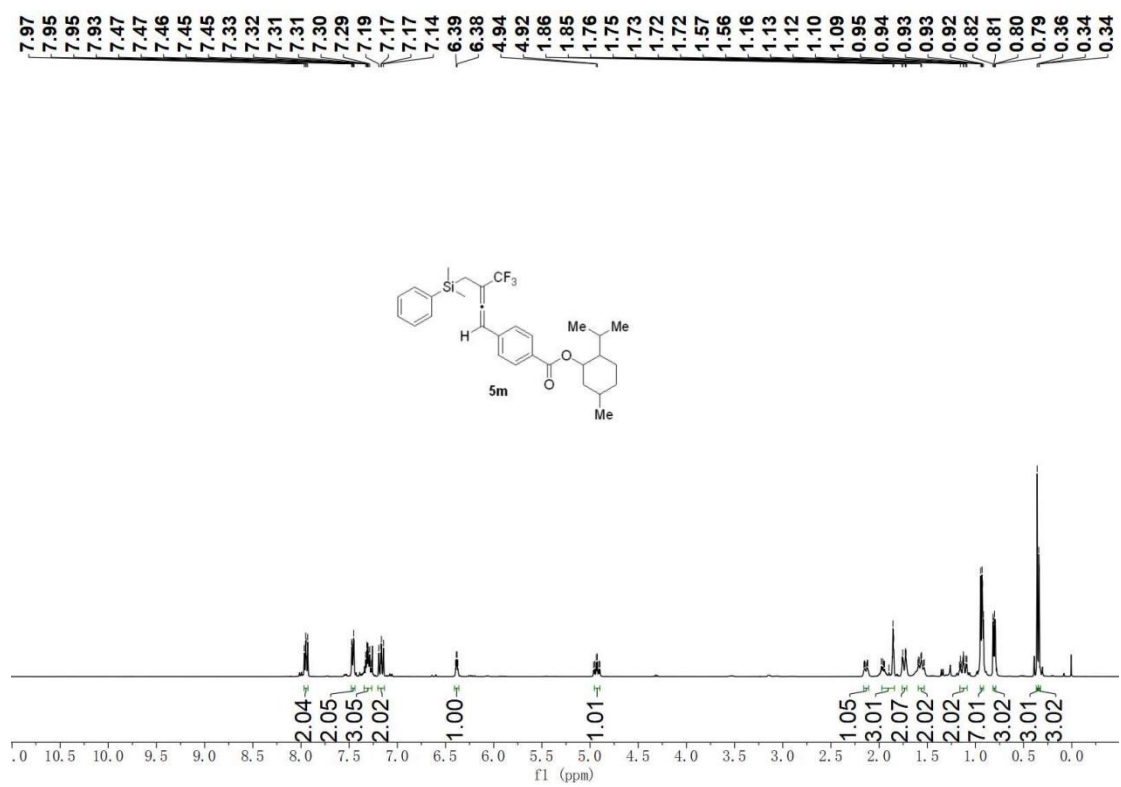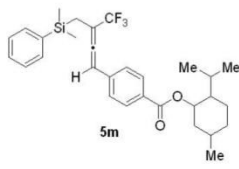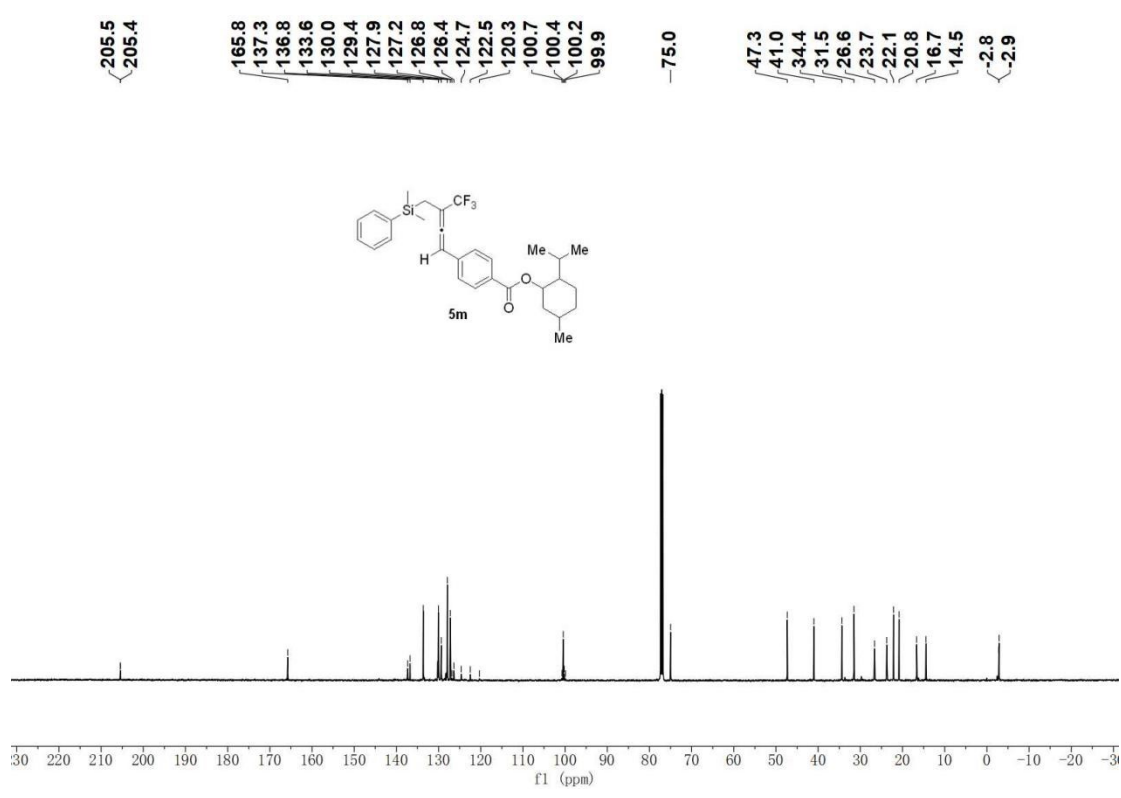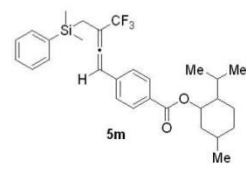

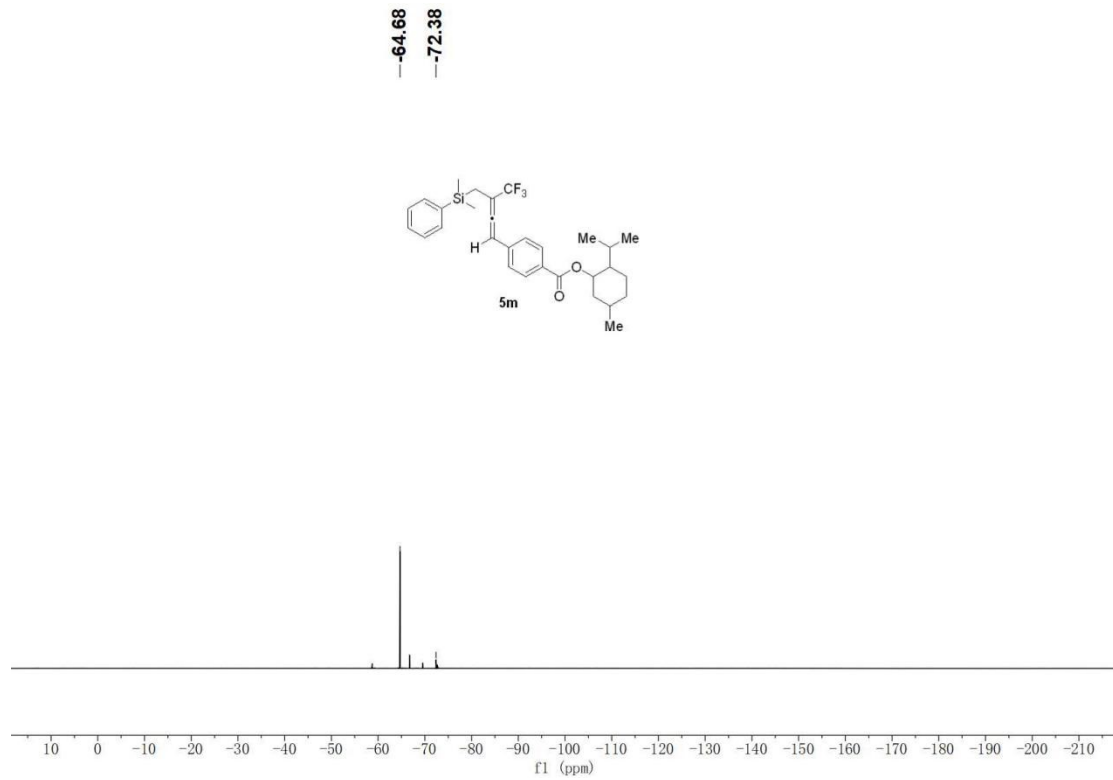

1,7,7-trimethylbicyclo[2.2.1]heptan-2-yl 4-(3-((dimethyl(phenyl)silyl)methyl)-4,4,4-trifluorobuta-1,2-dien-1-yl)benzoate(5n)

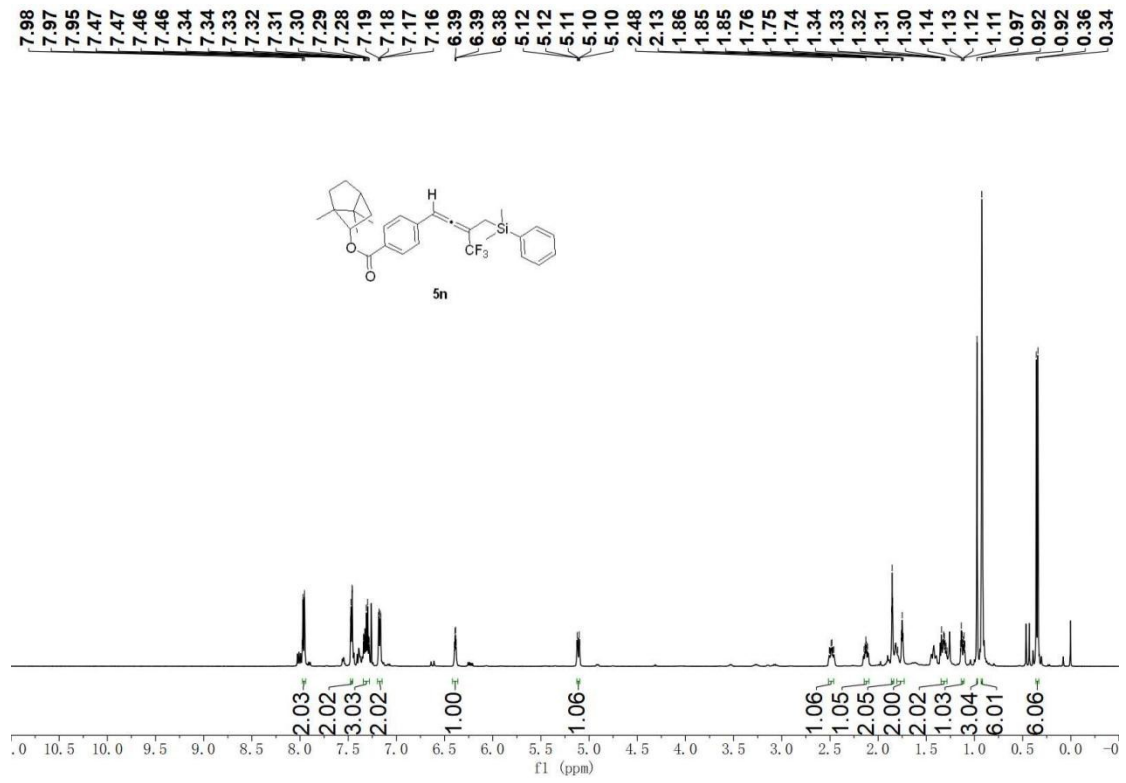

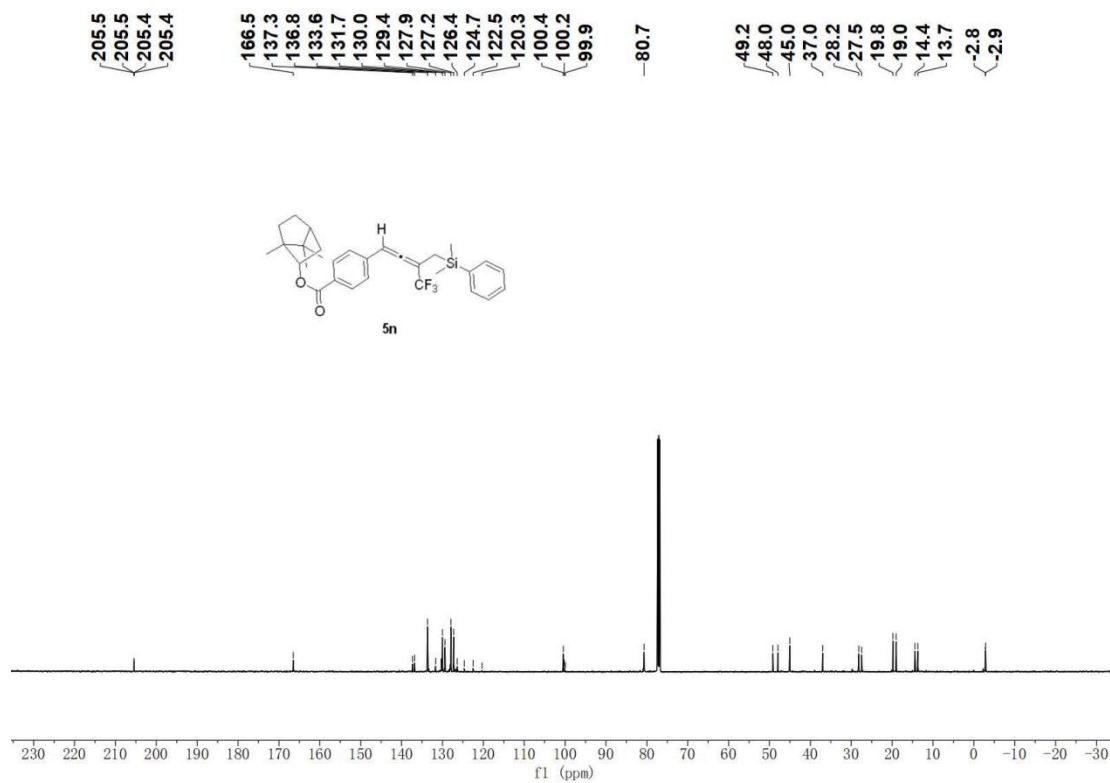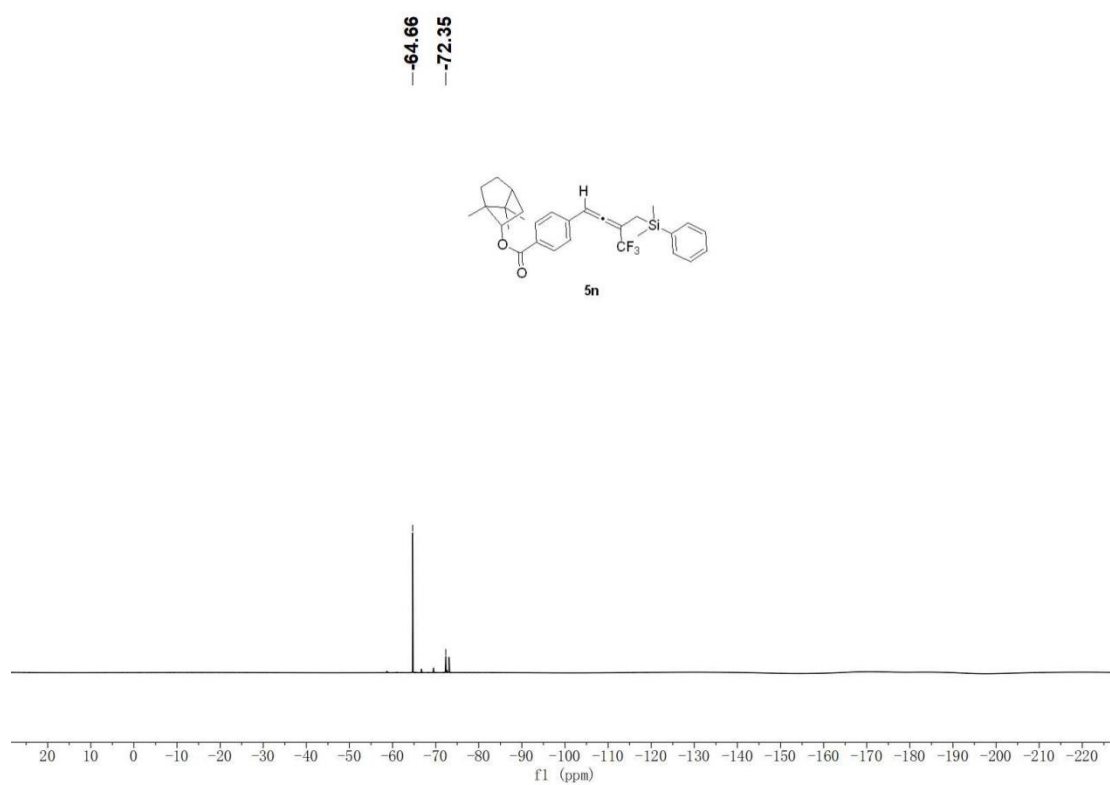

**((1s,3s)-adamantan-1-yl)methyl 4-(3-((dimethyl(phenyl)silyl)methyl)-4,4,4-trifluorobuta-1,2-dien-1-yl)benzoate(5o)**

7.90  
7.88  
7.88  
7.47  
7.47  
7.45  
7.34  
7.33  
7.32  
7.31  
7.30  
7.16  
7.15  
7.14  
7.14  
6.39  
6.38  
6.37  
6.36

2.26  
1.85  
1.85  
1.84  
1.84  
1.76  
1.75  
1.73  
1.72  
1.71  
1.68  
1.35  
1.34  
1.33  
1.31  
1.30  
1.29  
1.28  
1.27  
1.26  
0.35  
0.33

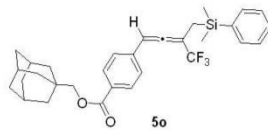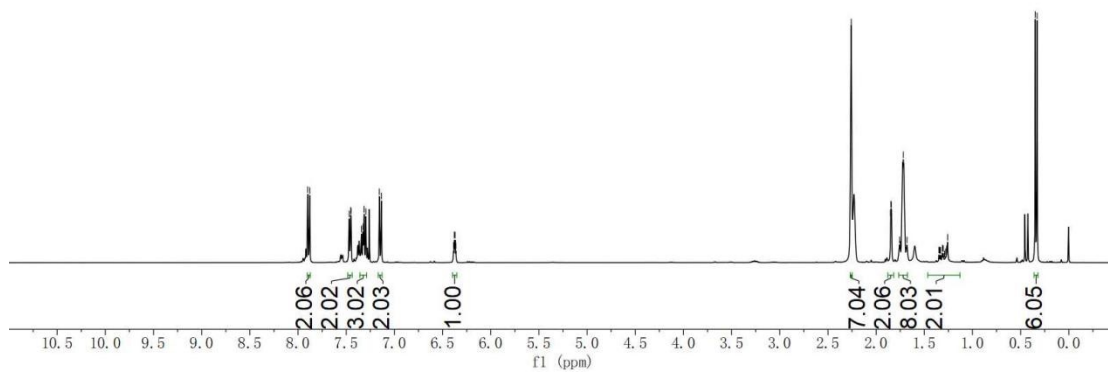

205.4  
205.4  
205.3  
205.3

165.1  
137.4  
136.3  
133.6  
131.5  
129.9  
129.3  
127.9  
127.1  
124.9  
122.2  
119.4

100.5  
100.4  
100.0  
99.7

-81.2

41.4  
41.4  
36.3  
36.2  
30.9

-14.4

-2.9

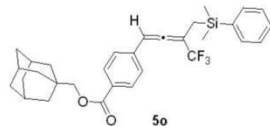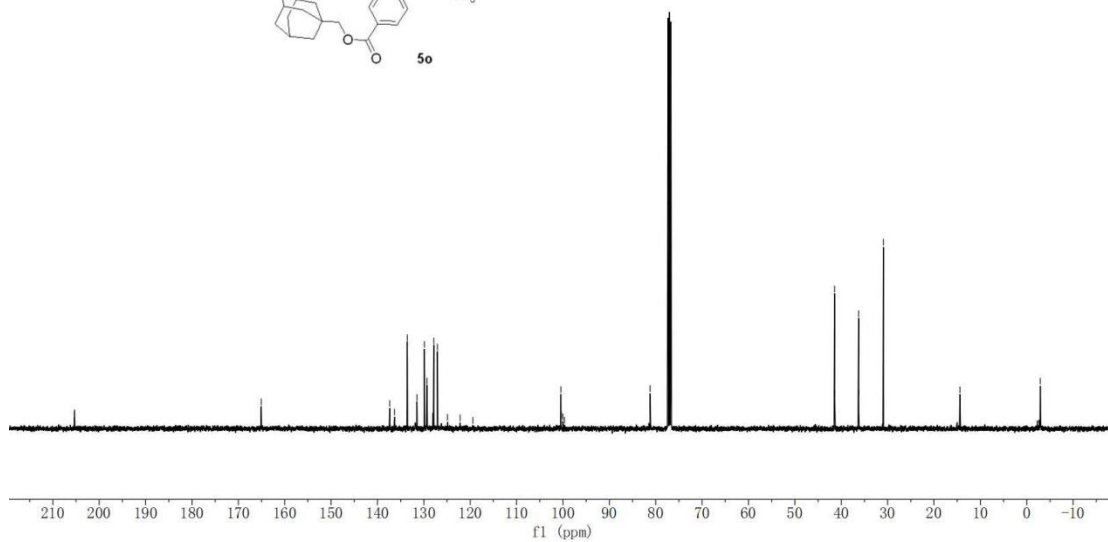

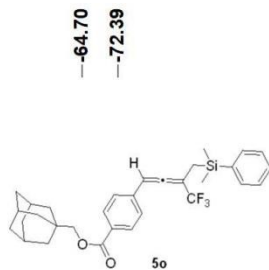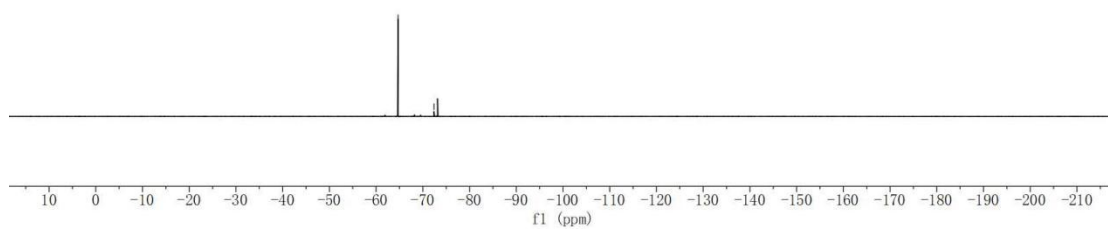

**4-phenyl-2-(trifluoromethyl)buta-2,3-dien-1-ol(8a)**

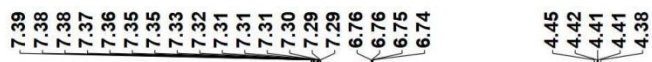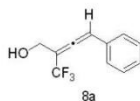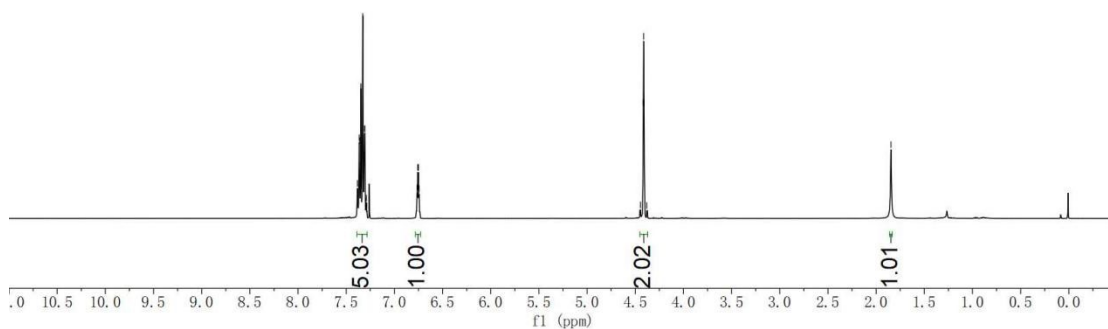

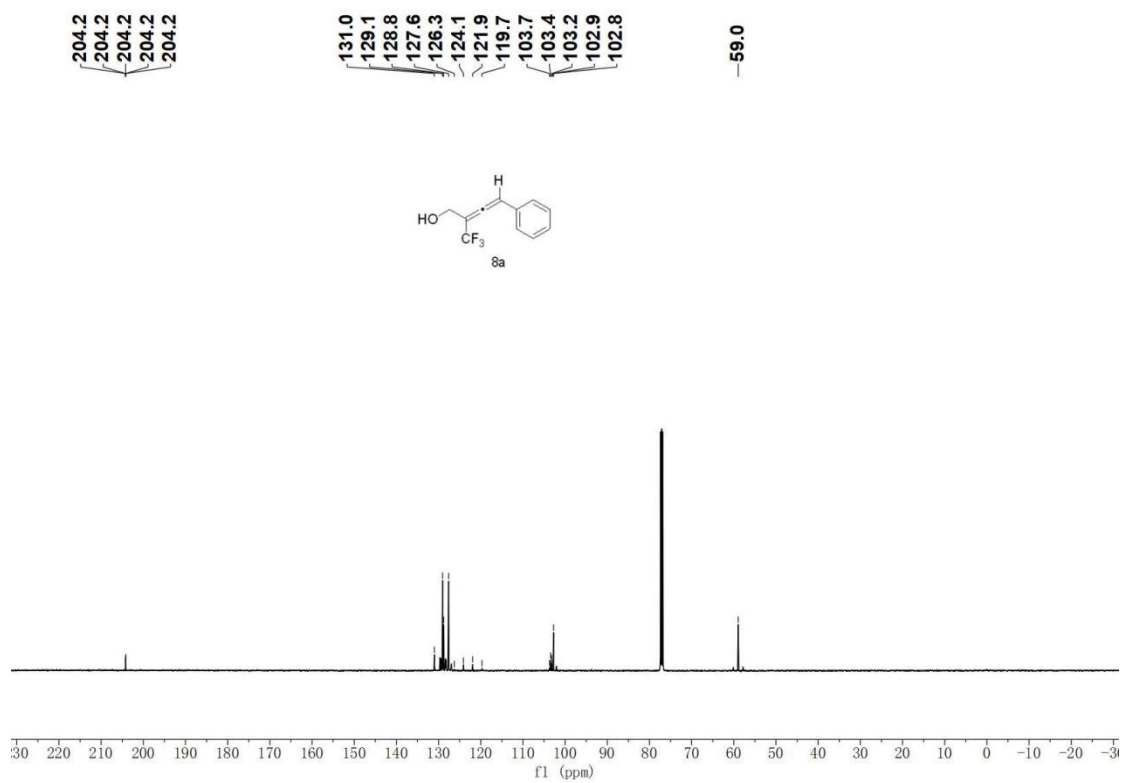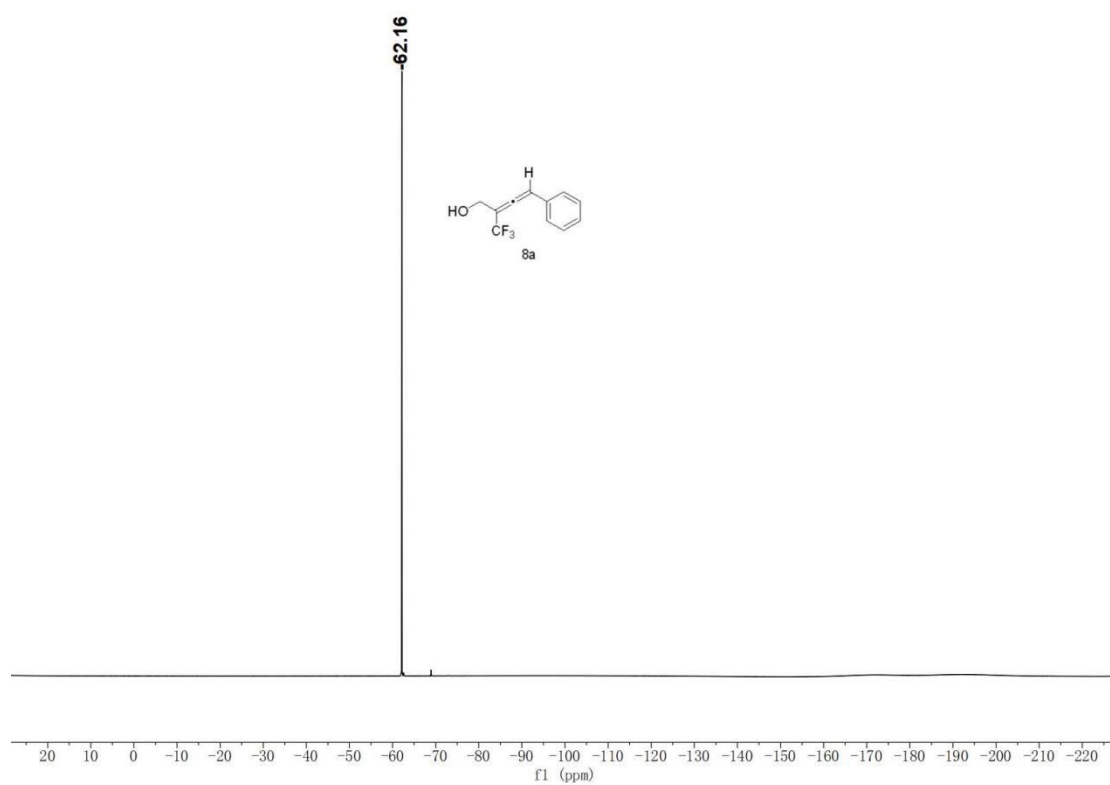

**(E)-2-benzylidene-1-phenyl-3-(trifluoromethyl)but-3-en-1-ol(9a)**

7.41  
7.40  
7.38  
7.36  
7.36  
7.35  
7.34  
7.32  
7.31  
7.30  
7.28  
7.28  
7.27  
7.27  
7.24  
7.24  
7.24  
7.23  
7.23  
7.22  
7.21  
7.06  
5.78  
5.77  
5.44  
4.99

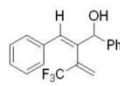

9a

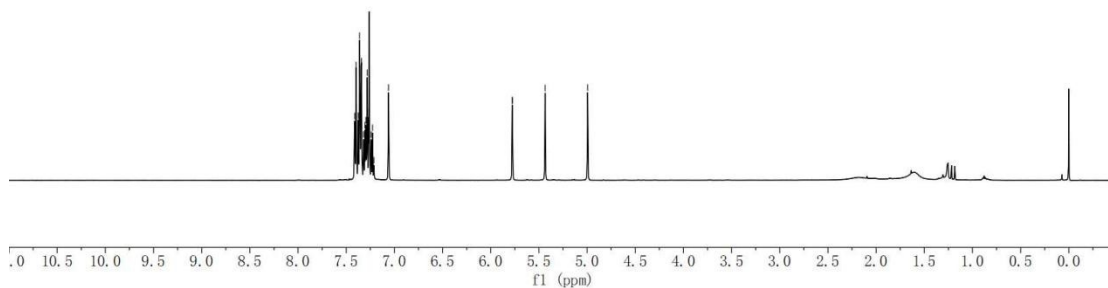

140.8  
136.8  
135.7  
135.4  
135.1  
134.9  
131.0  
129.1  
128.6  
128.2  
128.2  
127.7  
127.2  
126.0  
126.0  
125.9  
125.9  
124.1  
121.9  
119.7  
76.5

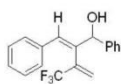

9a

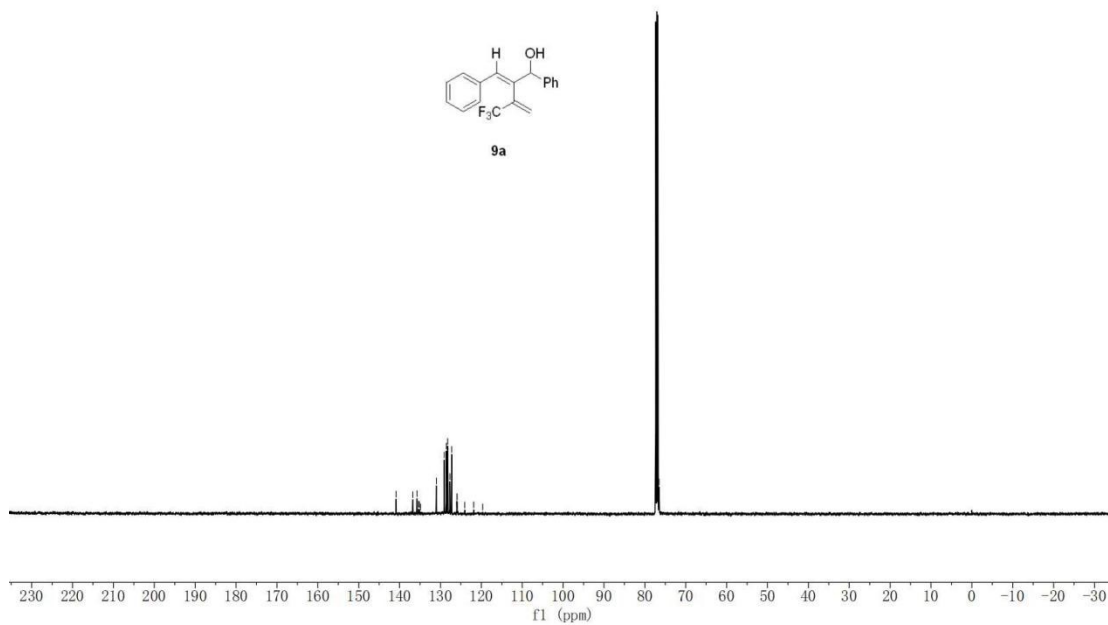



-64.35

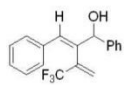

9a

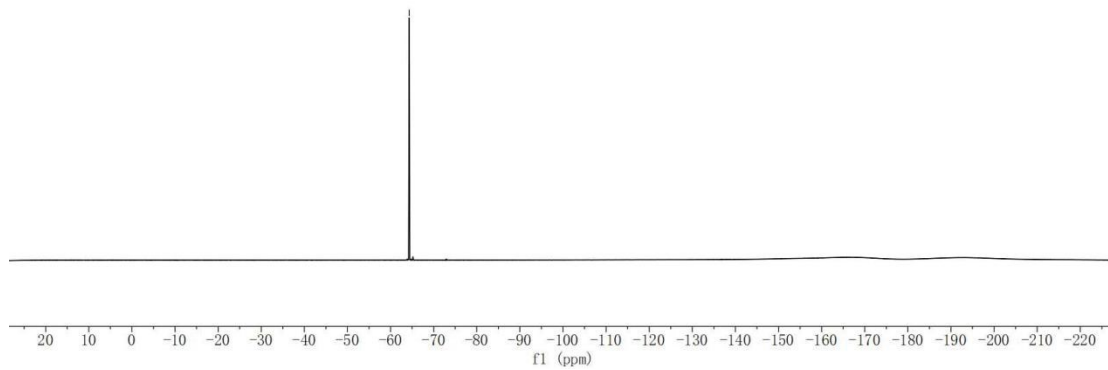

Supplement: d4qo00332b1.pdf [file d4qo00332b1.pdf]
